# Supplementary material for: Visible light-induced selective hydrobromodifluoromethylation of alkenes with dibromodifluoromethane
Source: Royal Society of Chemistry journal article supplement (doi:10.1039/c5ob01302j), 2015-01-01

## Supporting Information

### Visible light-induced selective hydrobromodifluoromethylation of alkenes with dibromodifluoromethane

Qing-Yu Lin,<sup>†</sup> Xiu-Hua Xu<sup>†</sup> and Feng-Ling Qing<sup>\*,†,‡</sup>

*<sup>†</sup>Key Laboratory of Organofluorine Chemistry, Shanghai Institute of Organic  
Chemistry, Chinese Academy of Sciences, 345 Lingling Lu, Shanghai 200032, China*

*<sup>‡</sup>College of Chemistry, Chemical Engineering and Biotechnology, Donghua  
University, 2999 North Renmin Lu, Shanghai 201620, China*

E-mail: flq@mail.sioc.ac.cn

**Stern-Volmer Studies: Luminescence Quenching of Eosin Y\* by CF<sub>2</sub>Br<sub>2</sub>.....S2**

**Copies of <sup>1</sup>H NMR, <sup>19</sup>F NMR and <sup>13</sup>C NMR Spectra of Products.....S3-  
S59**

### Stern-Volmer Studies: Luminescence Quenching of Eosin Y\* by CF<sub>2</sub>Br<sub>2</sub>.

Emission intensities were recorded using a HITACHI F-4600 Luminescence spectrometer. All Eosin Y solutions were excited at 470 nm and the emission intensity at 580 nm was observed.

General experimental procedure: A solution of Eosin Y in THF was prepared and degassed three times via freeze-pump-thaw cycle in a 1 cm quartz cell equipped with a sphere moiety for freeze. The solution of CF<sub>2</sub>Br<sub>2</sub> in THF was added to the solution of the Eosin Y before measurement of emission intensities.

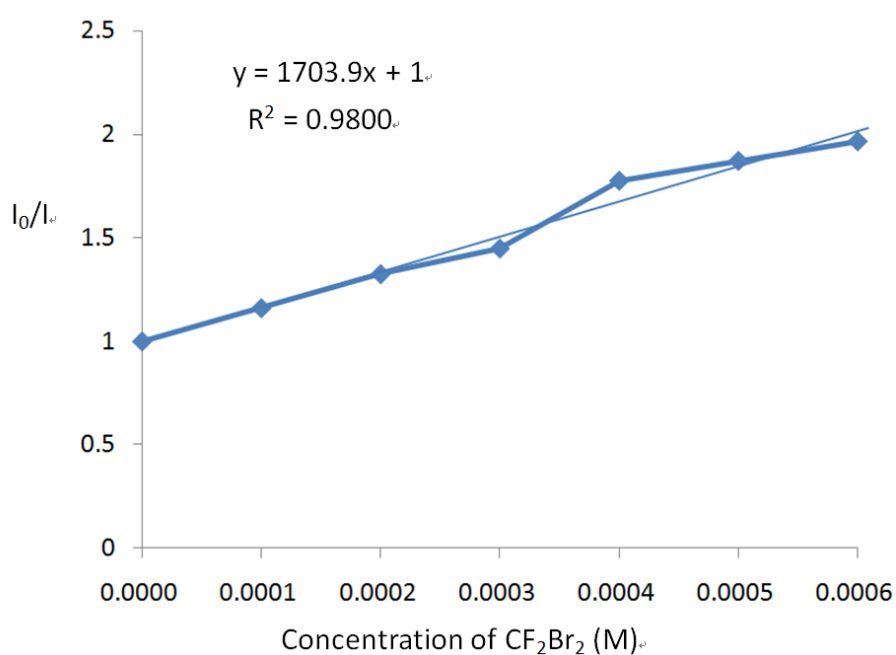

3a

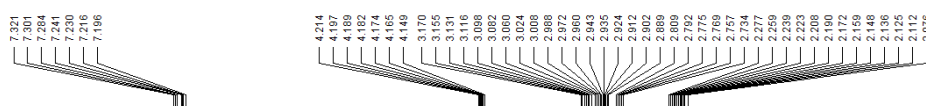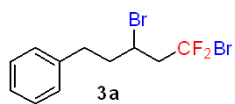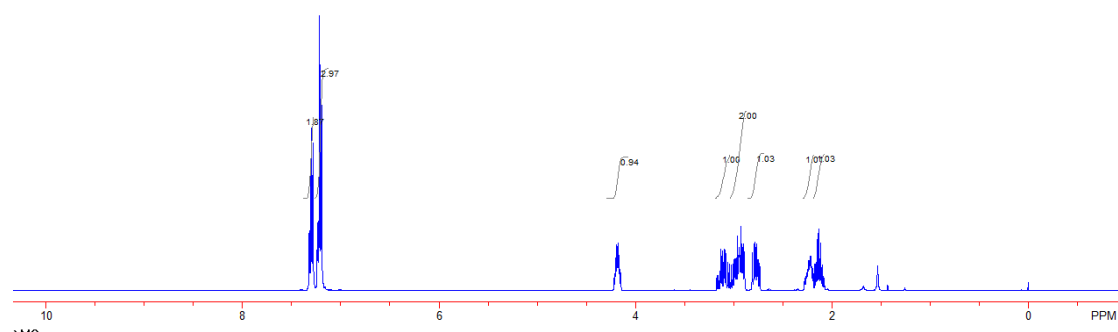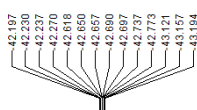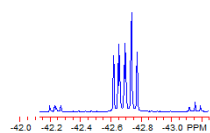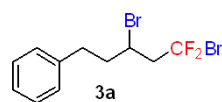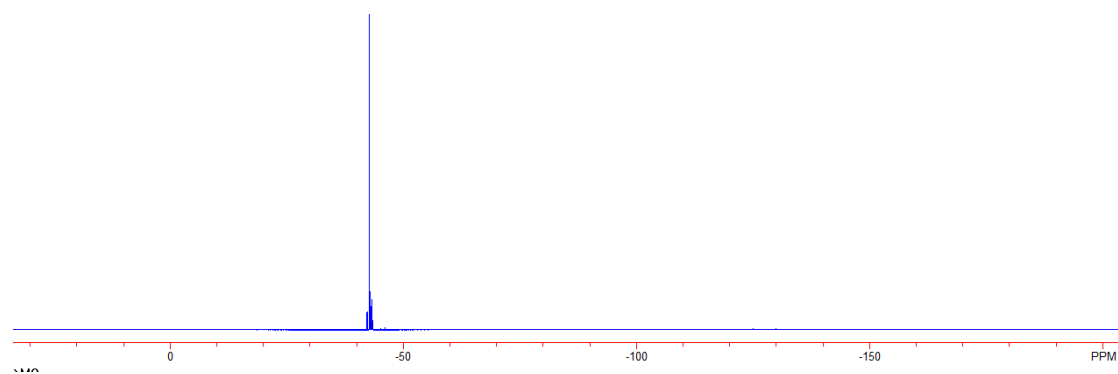

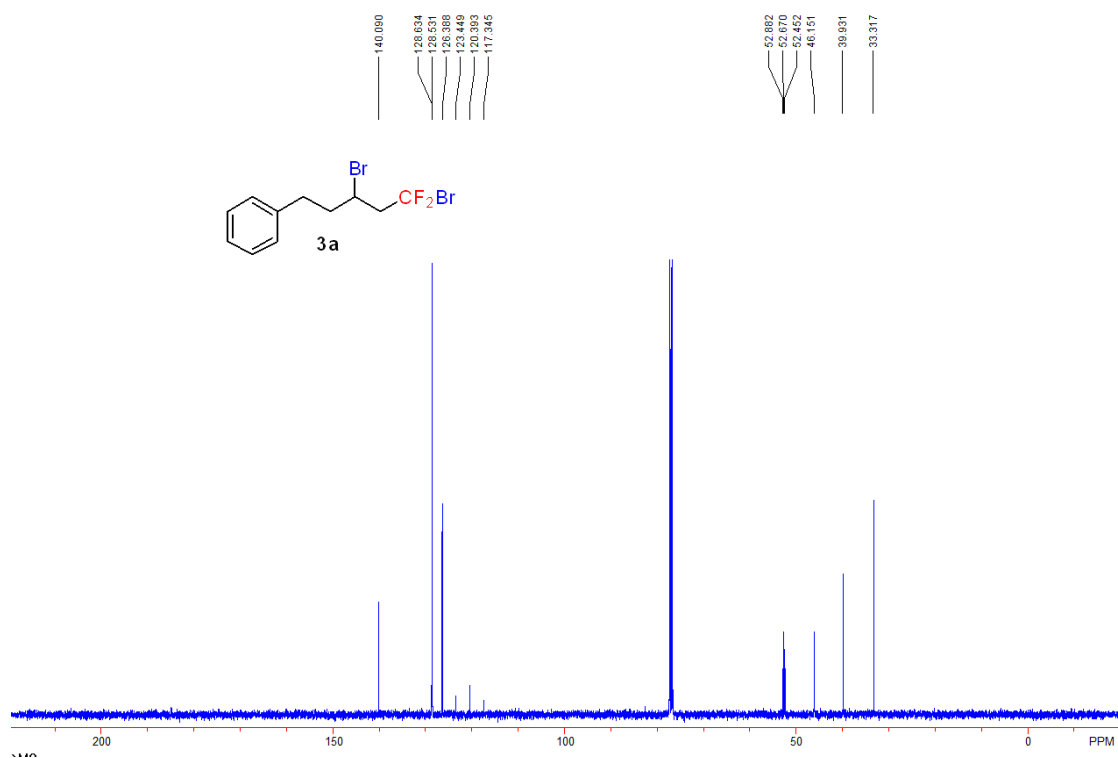

4a

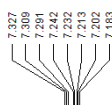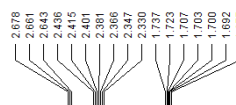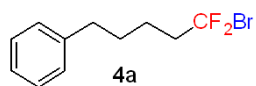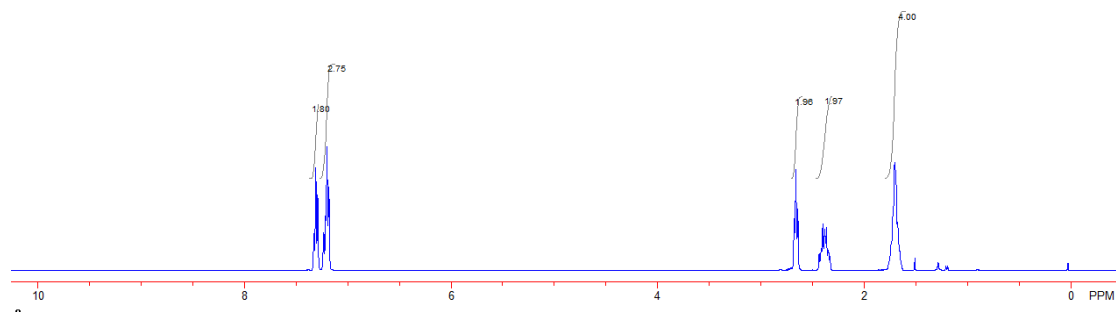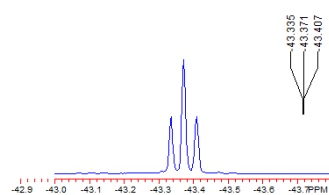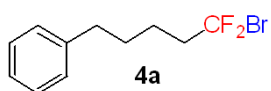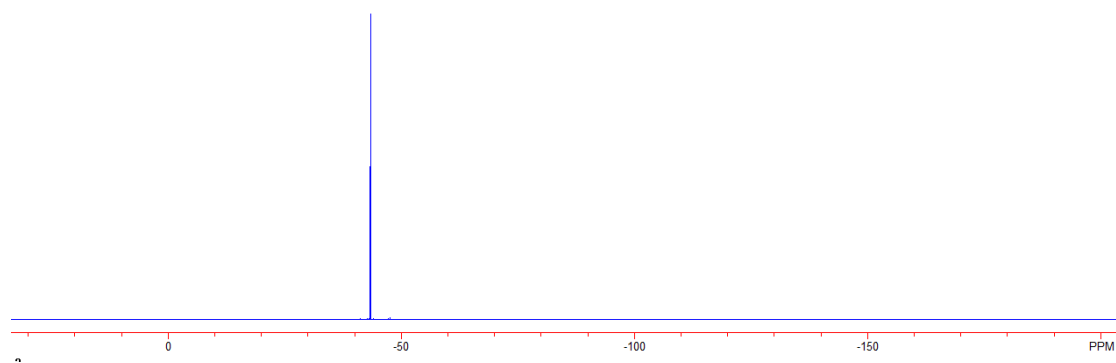

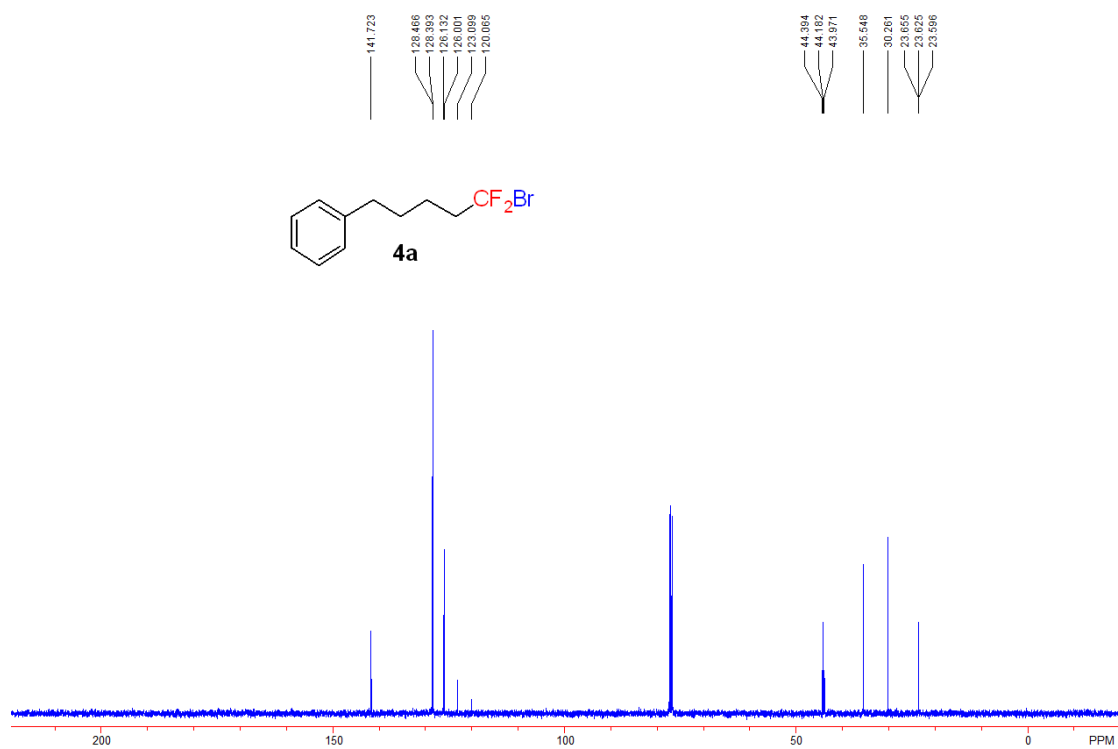

**4b**

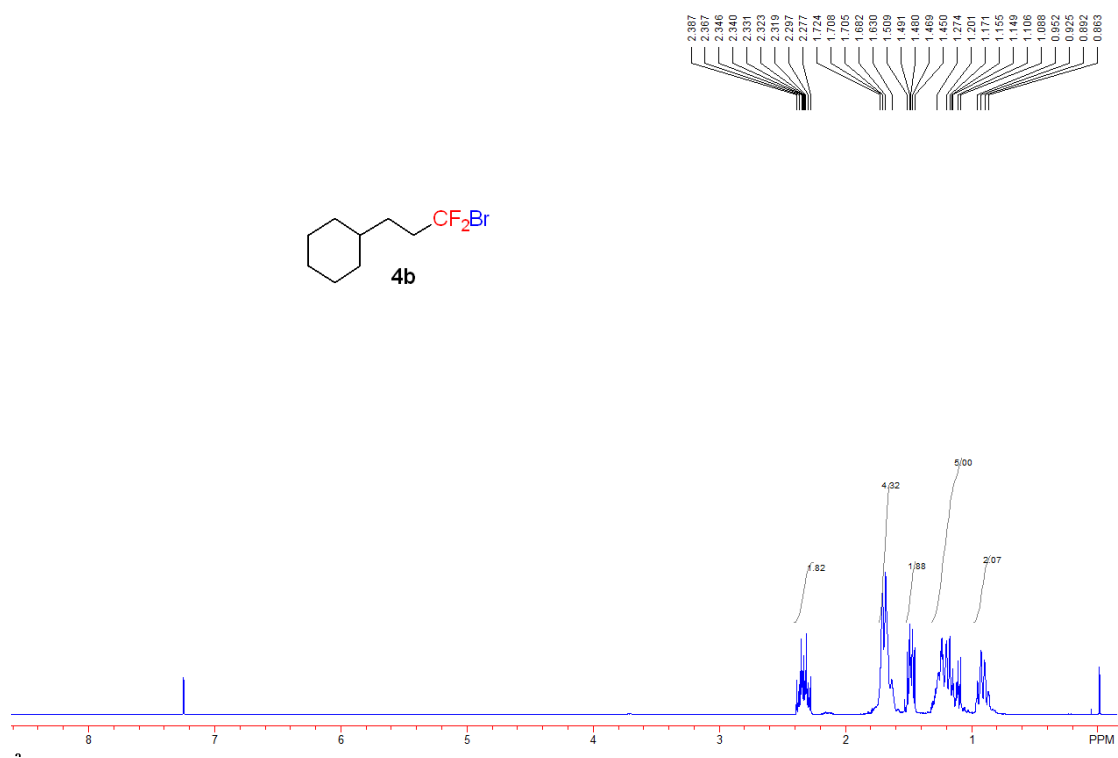

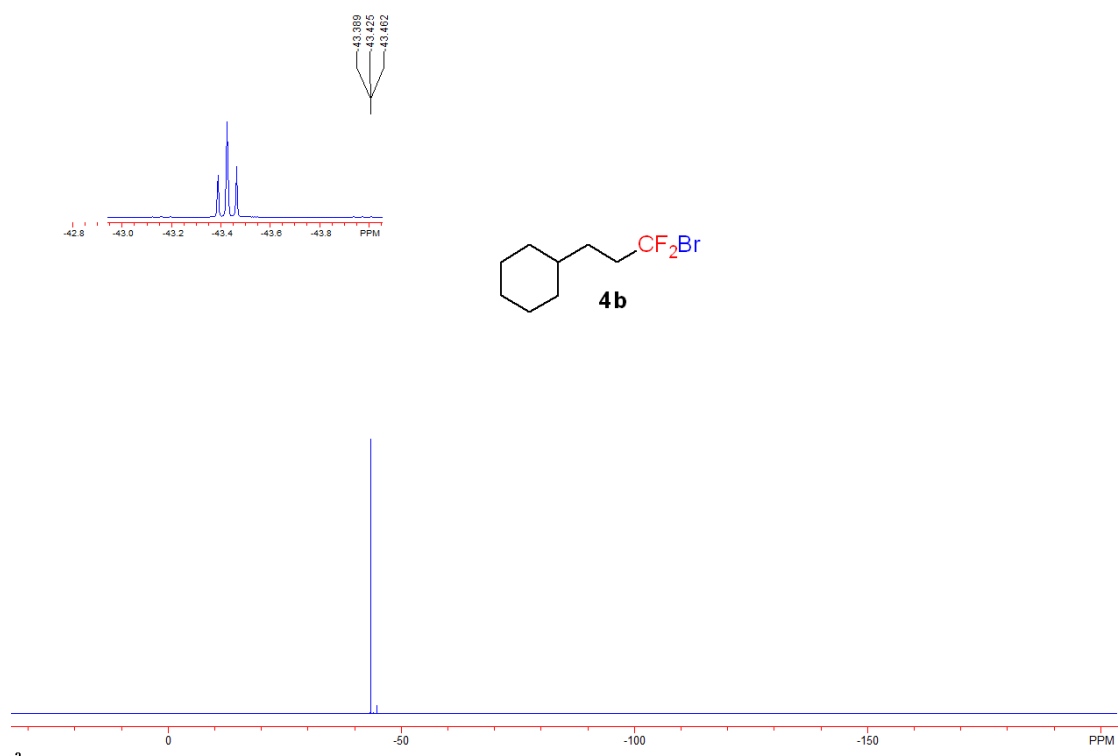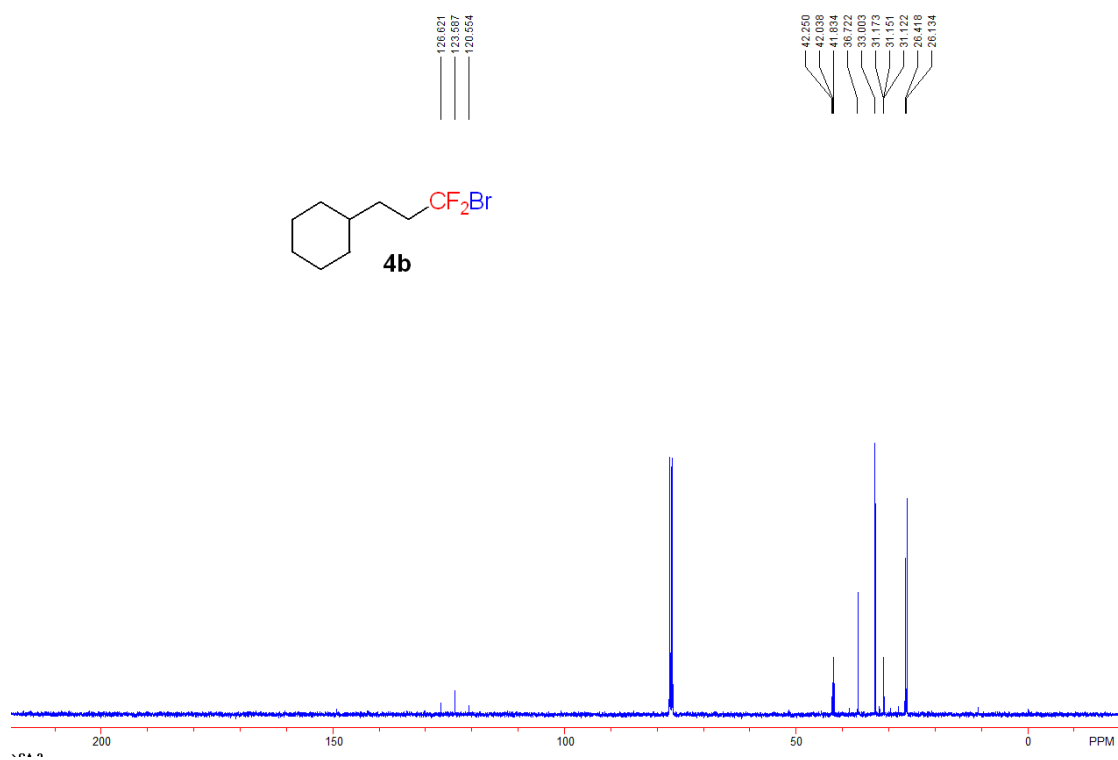

4c

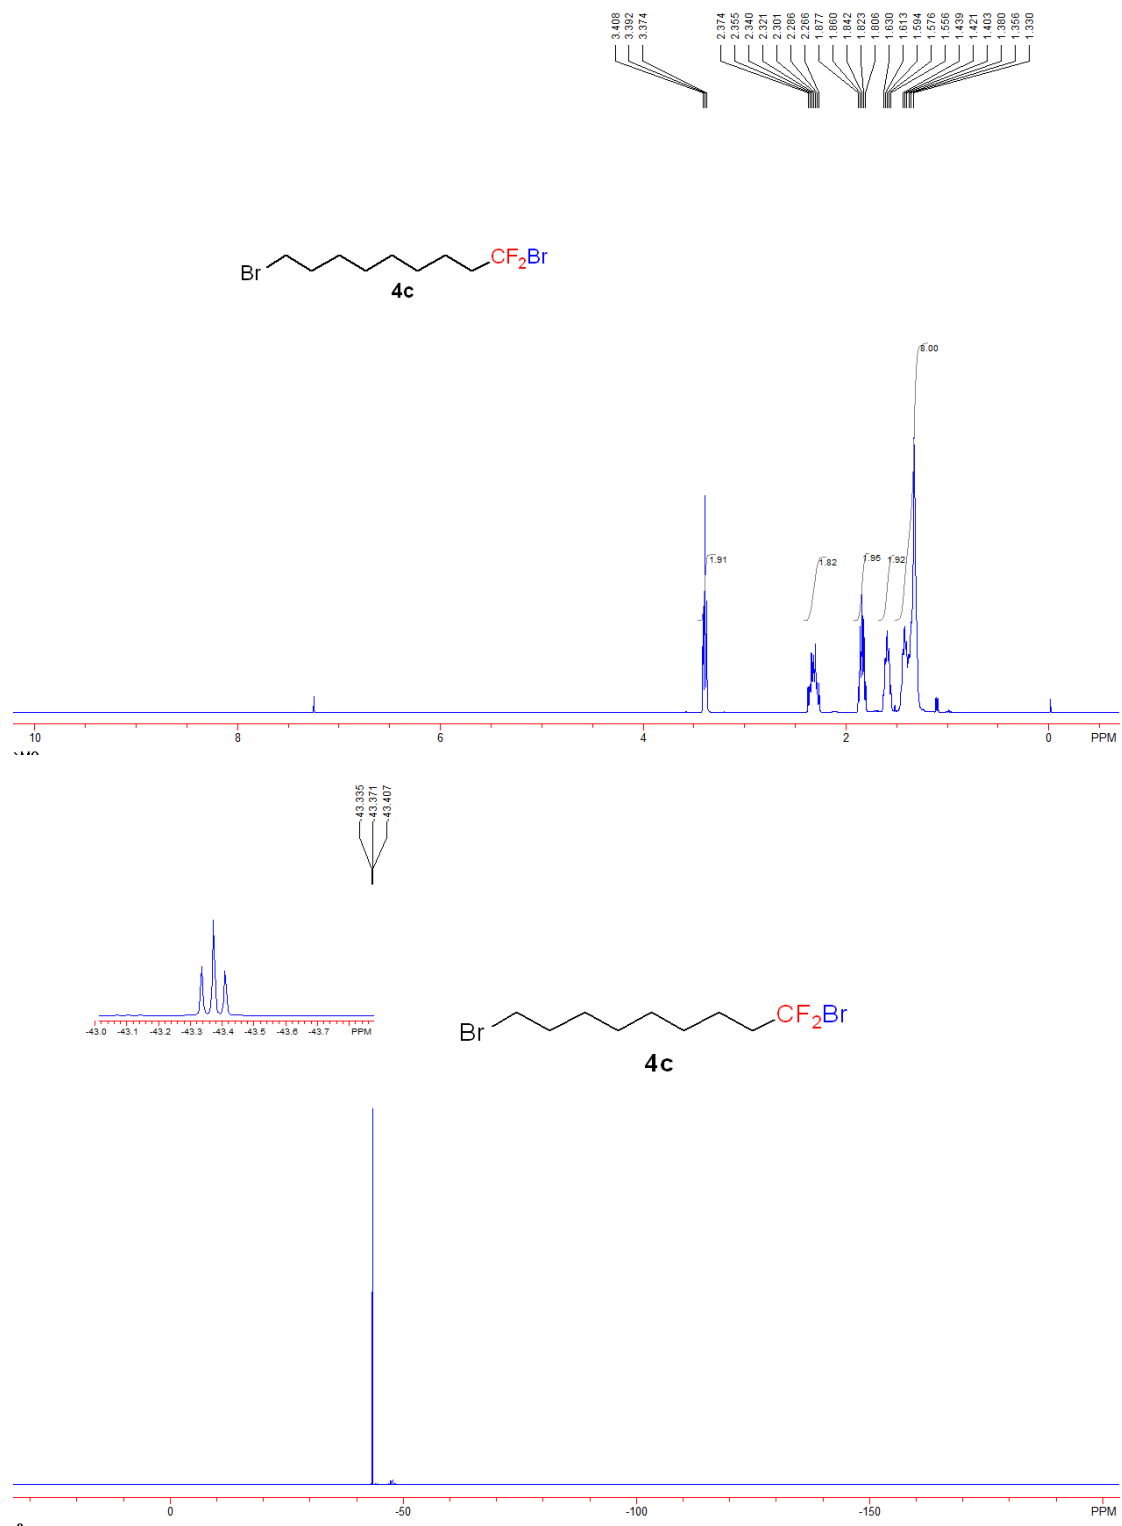



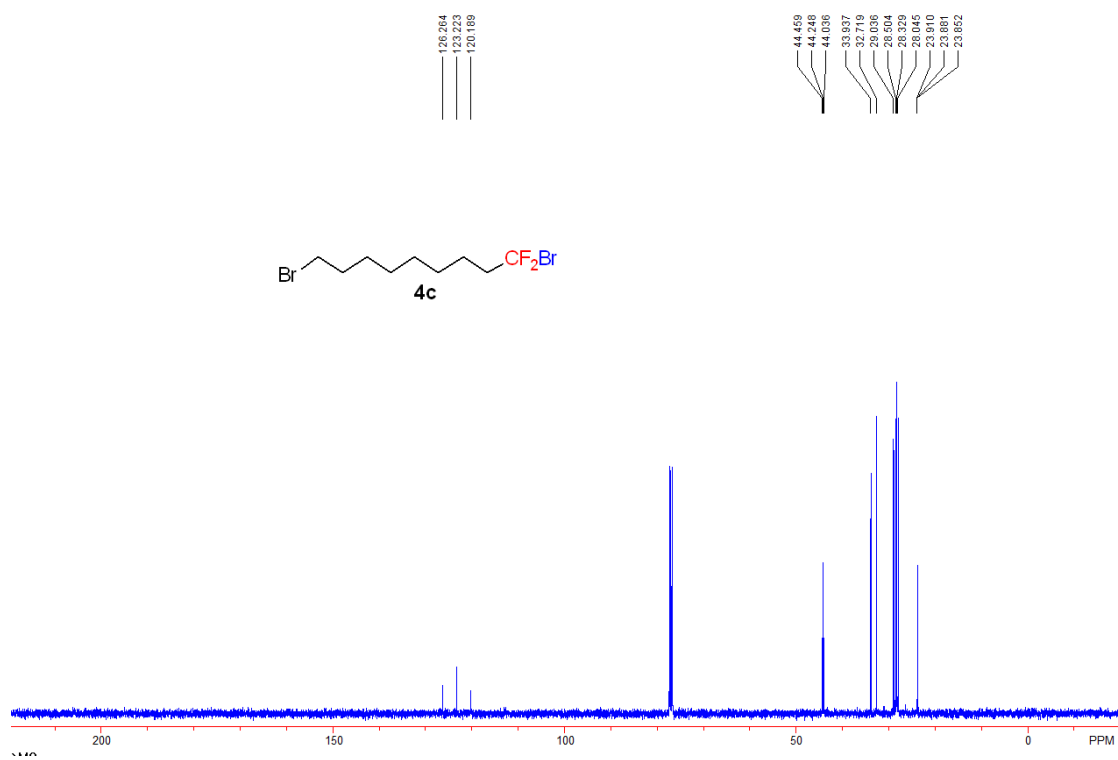

4d

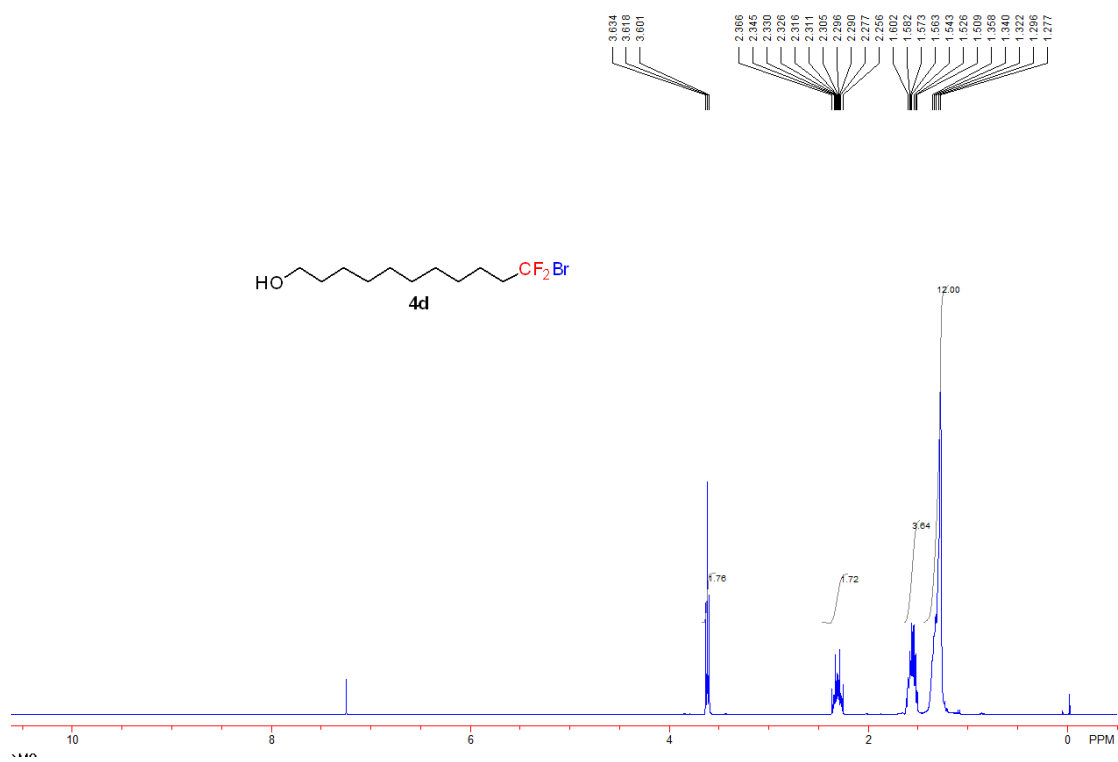

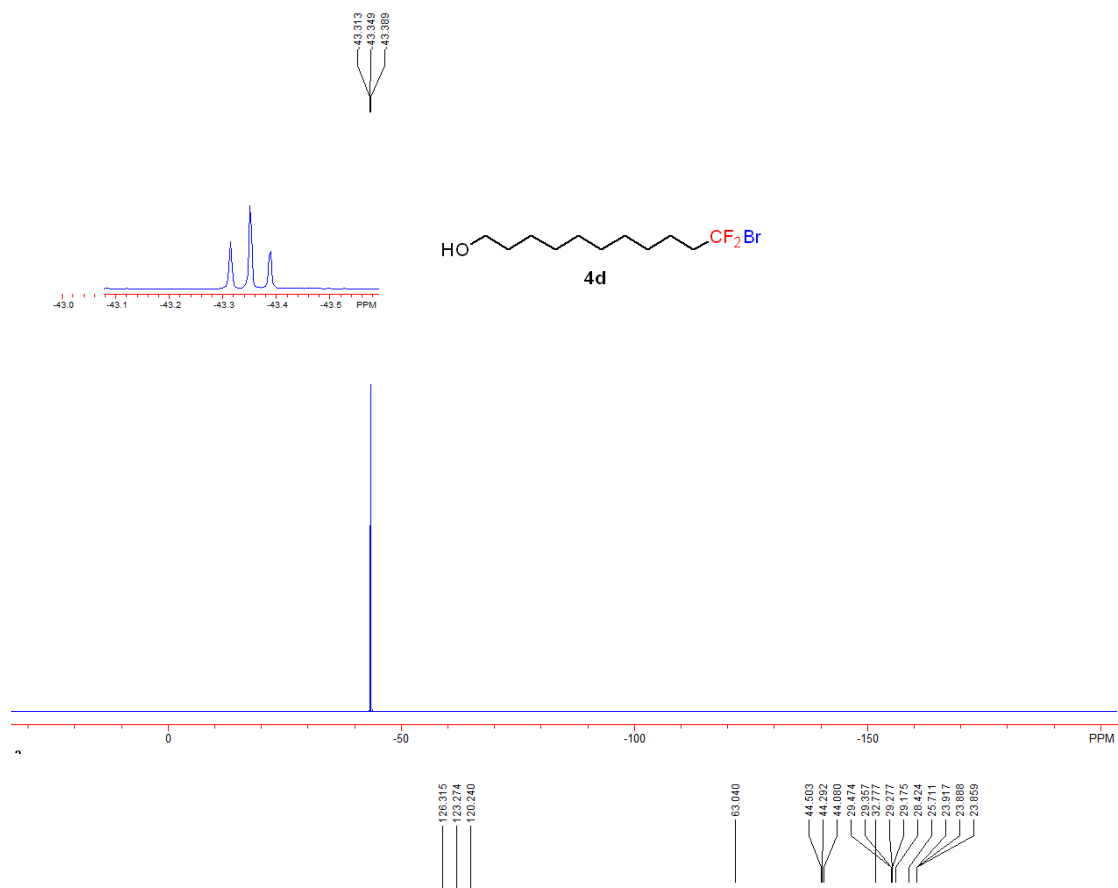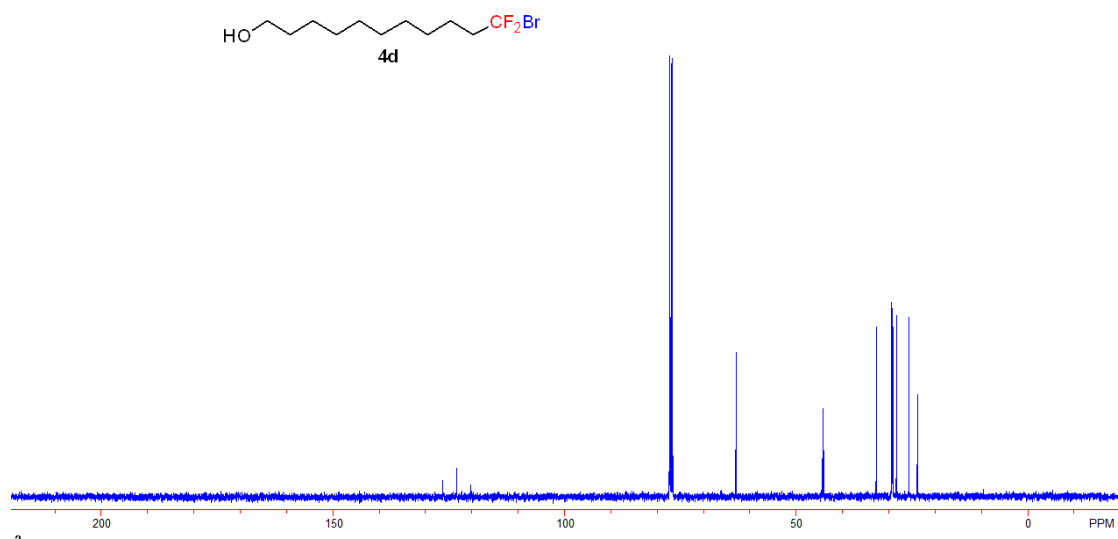

4e

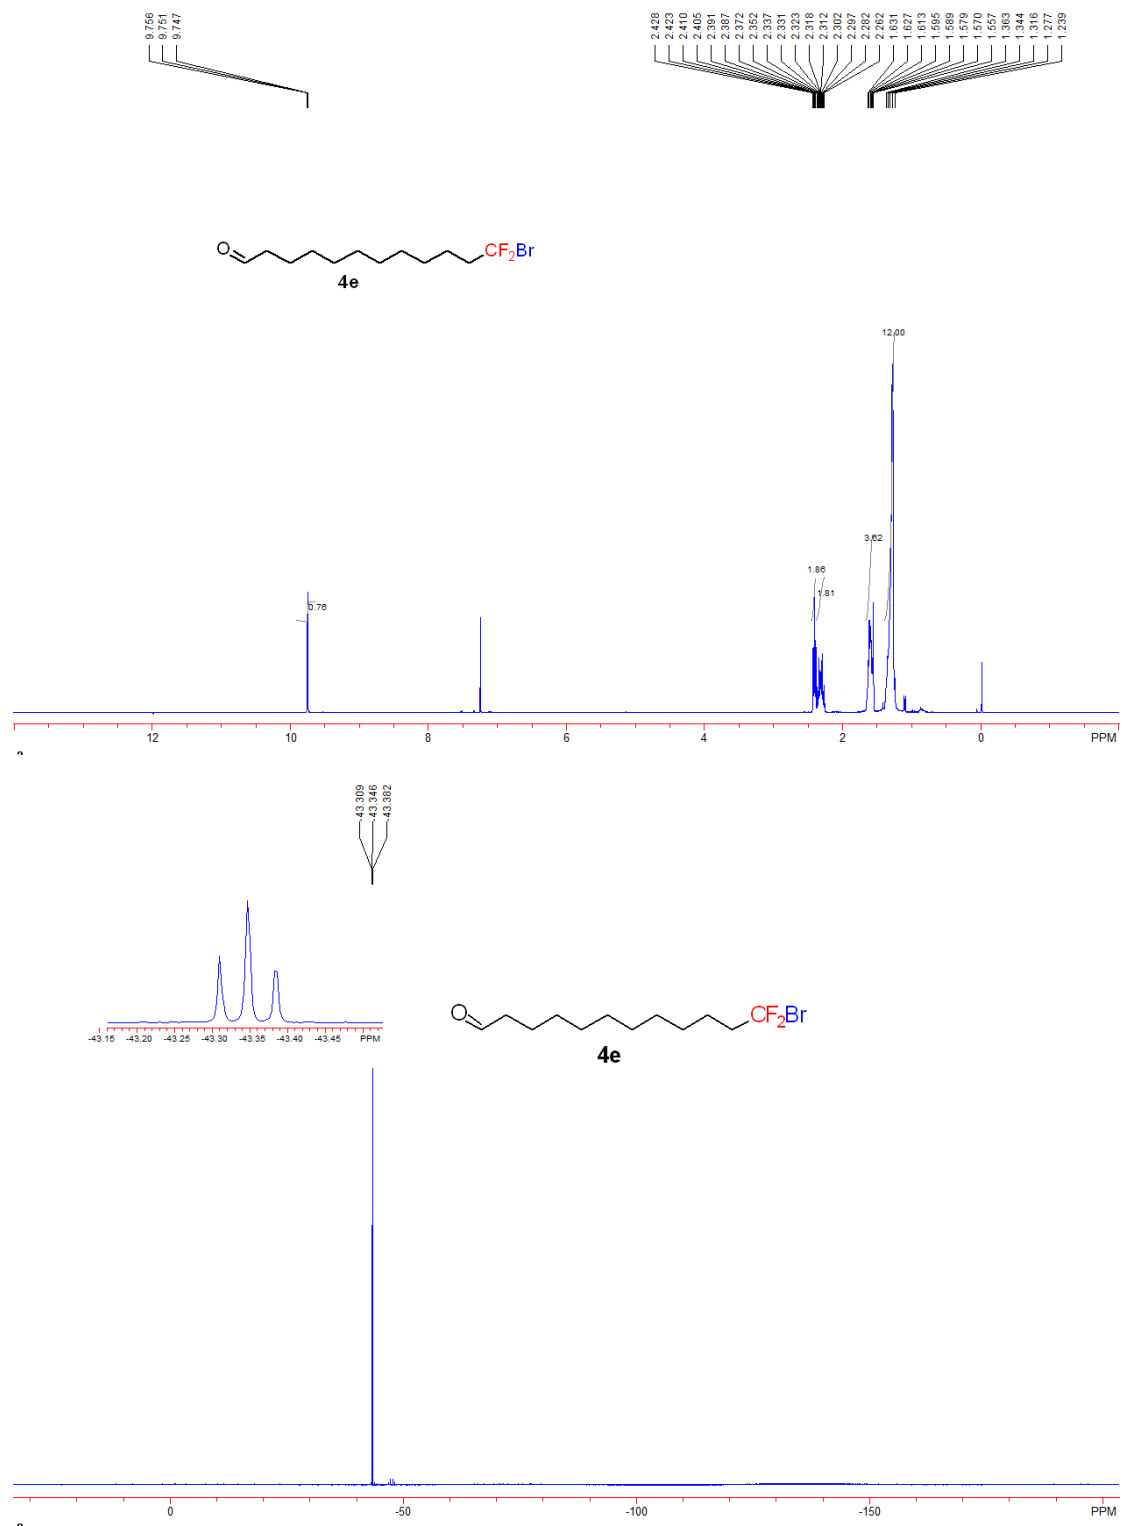

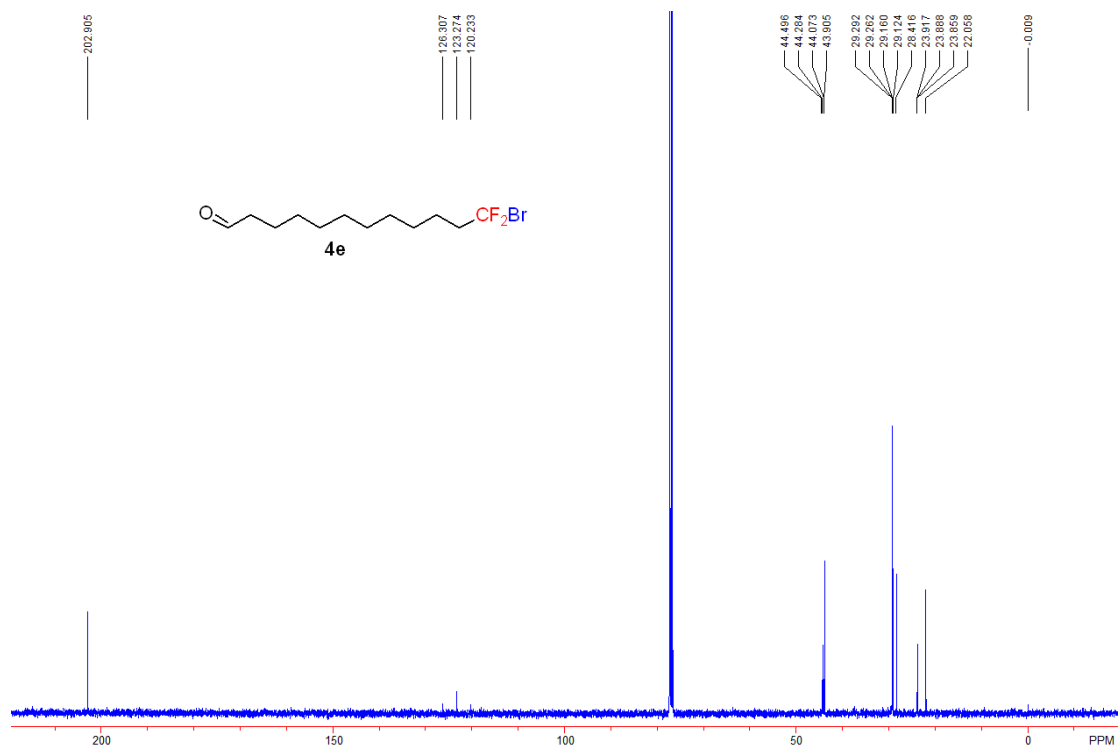

**4f**

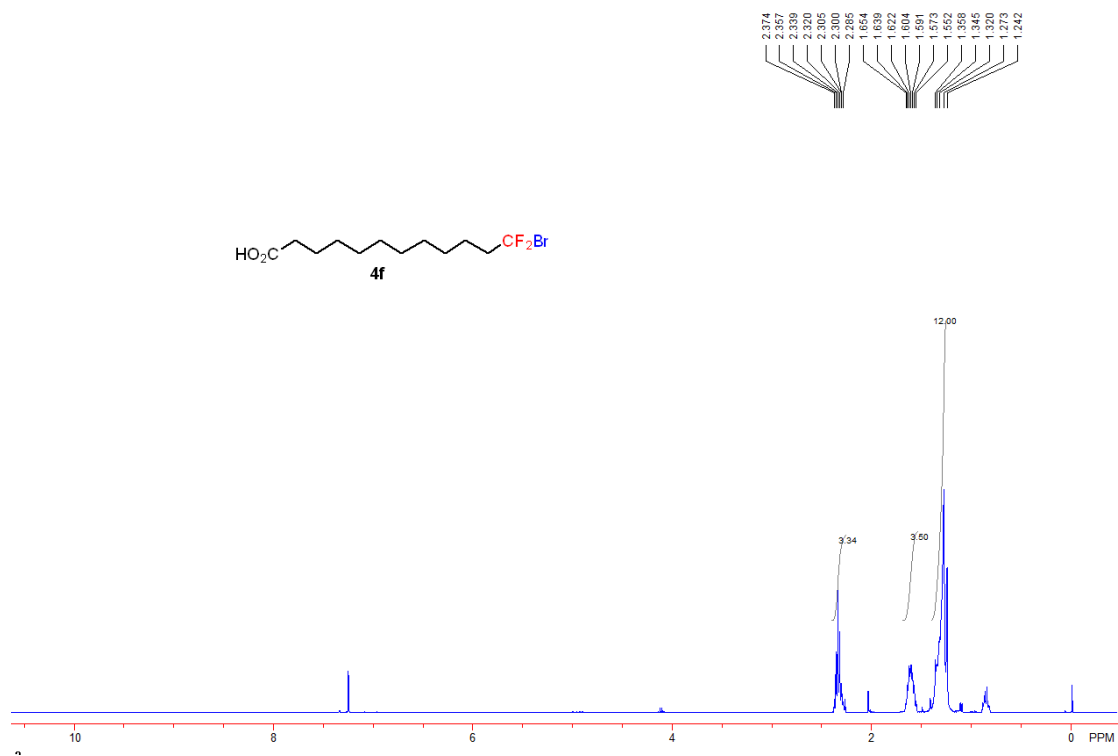

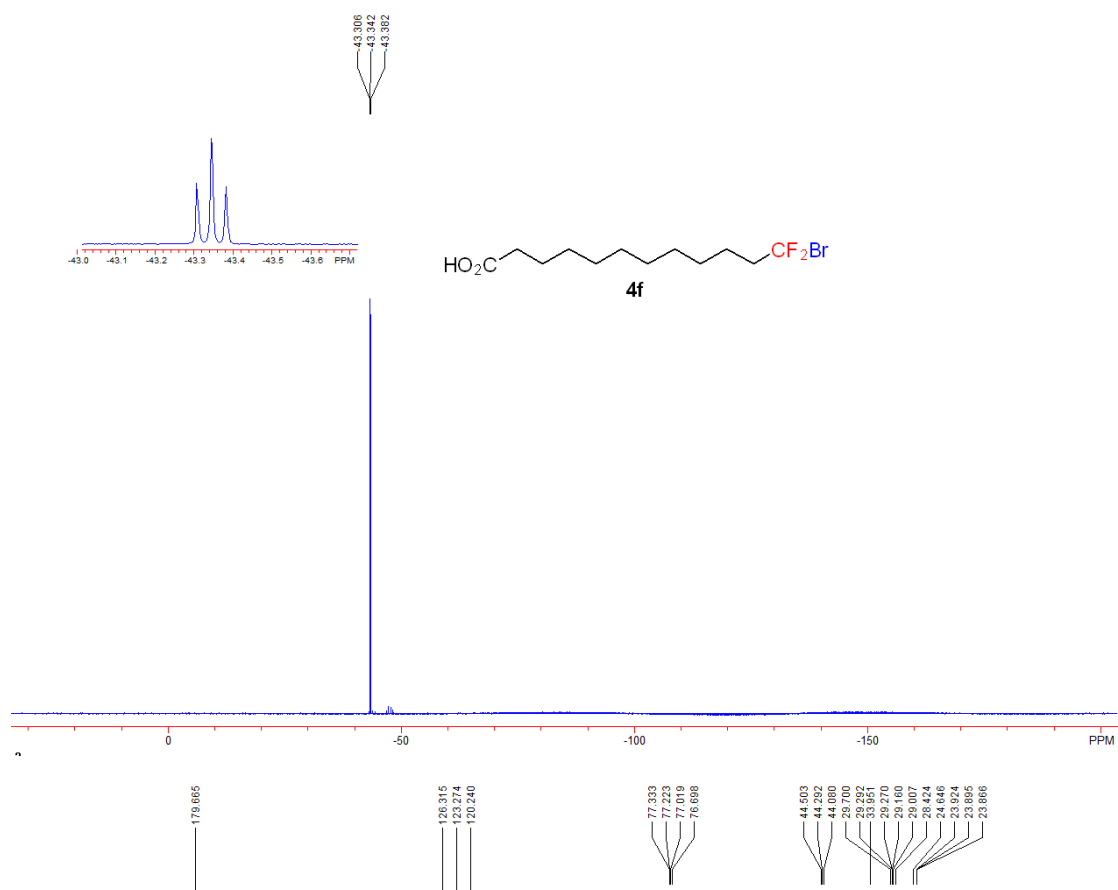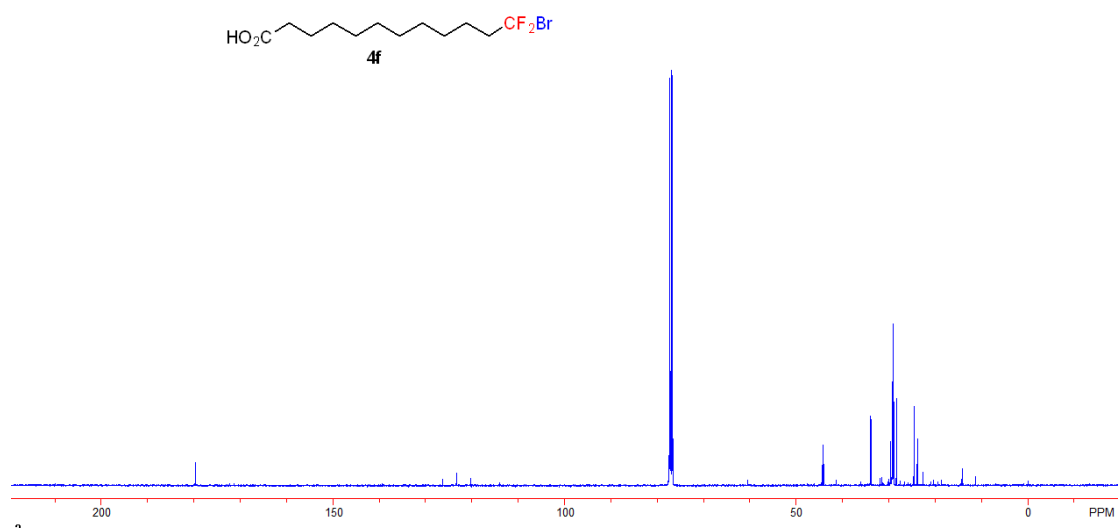

4g

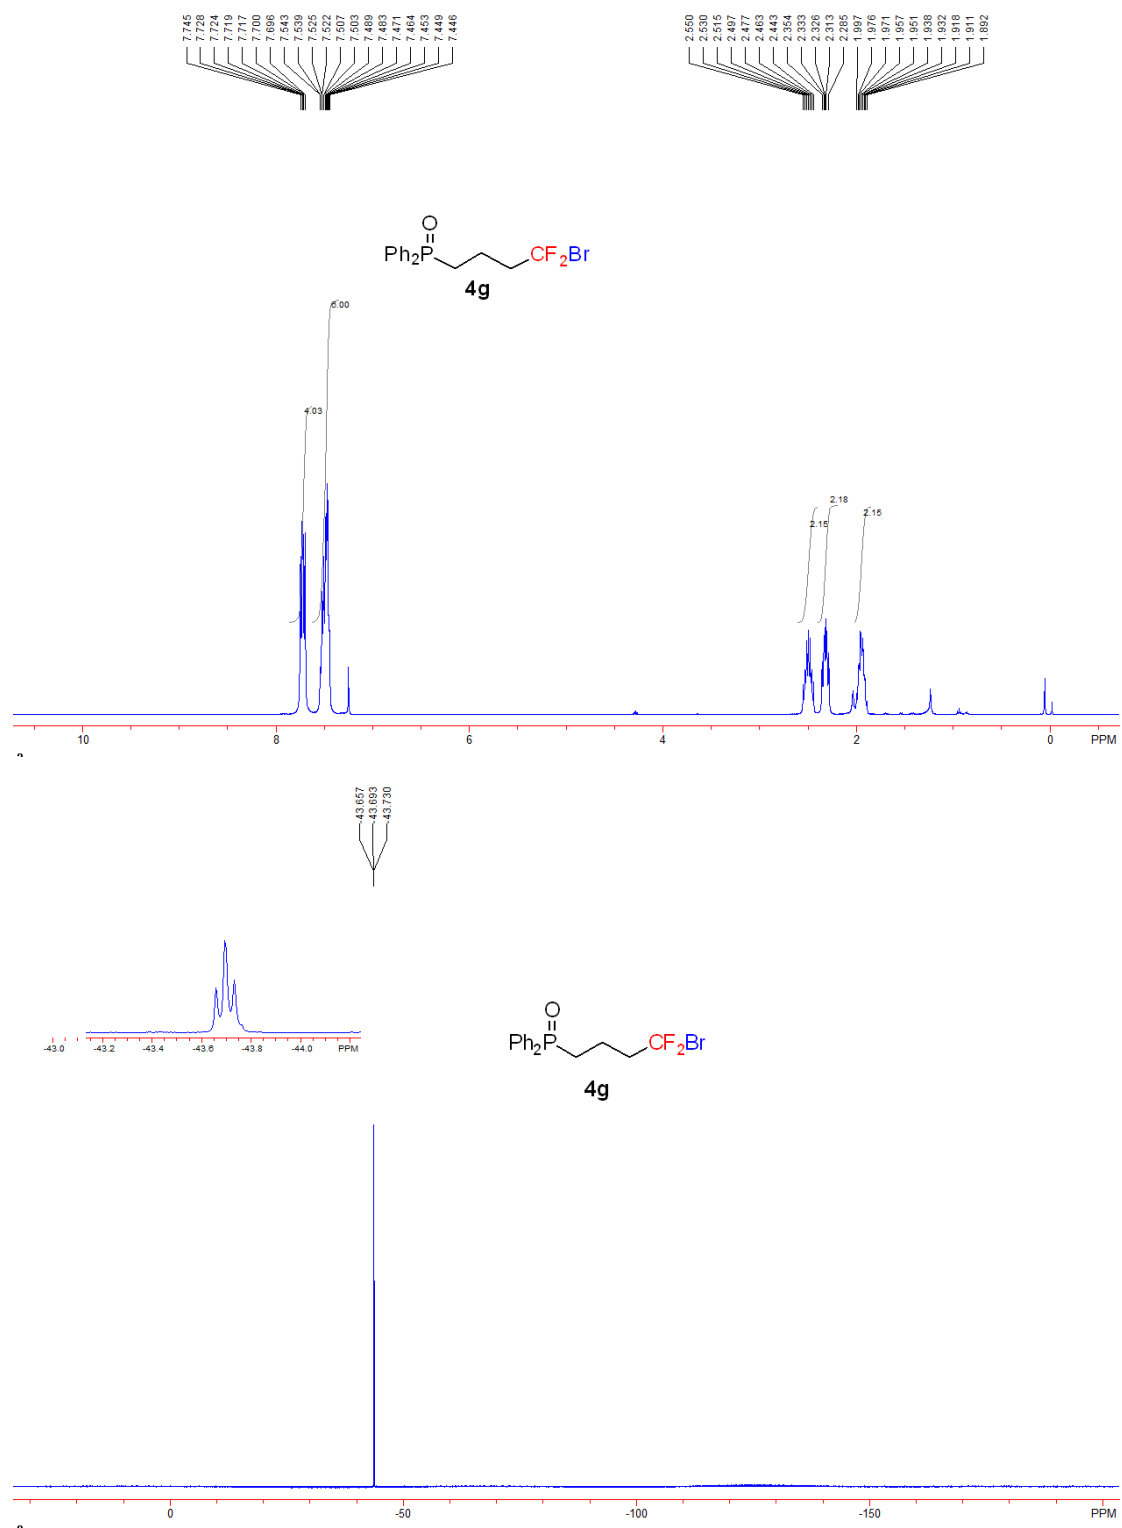

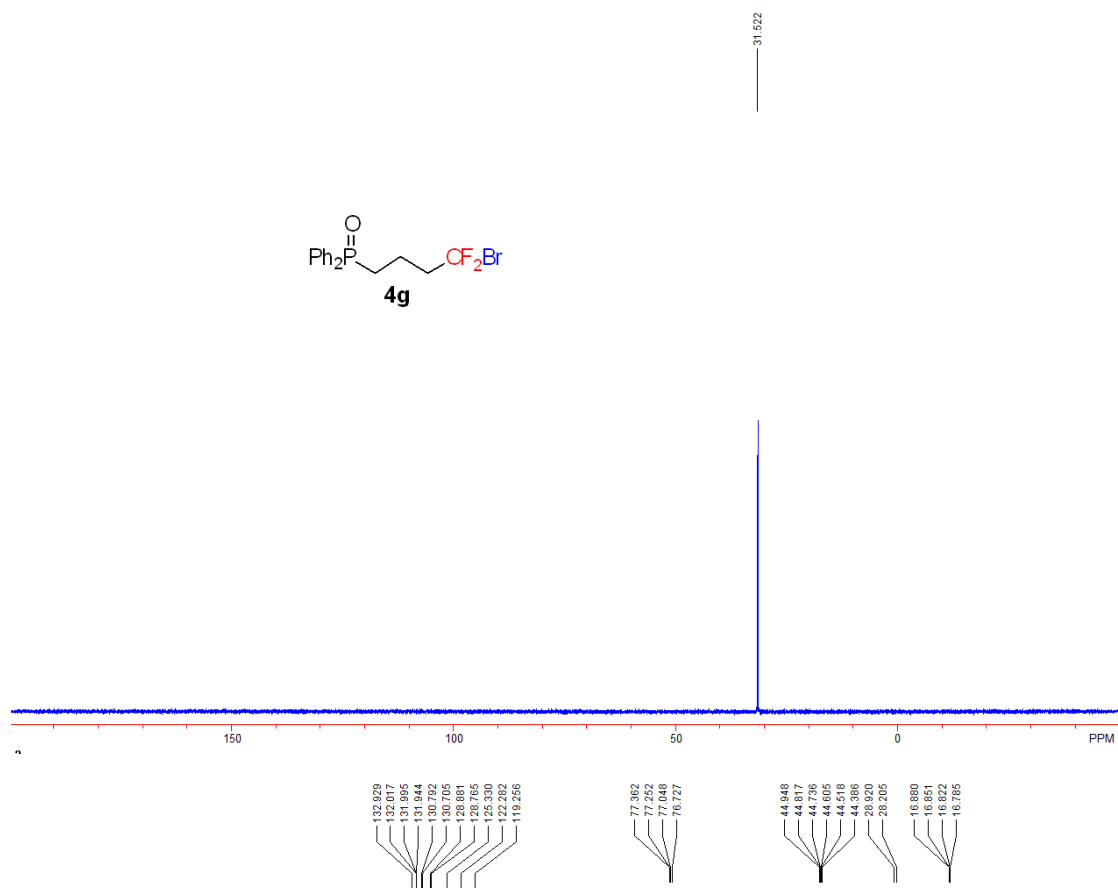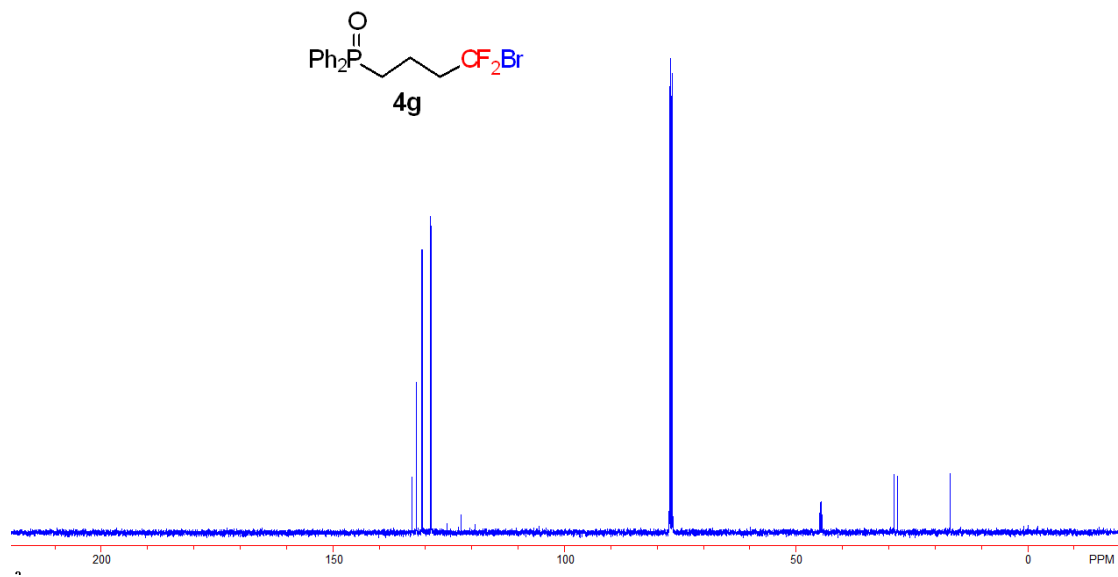

4h

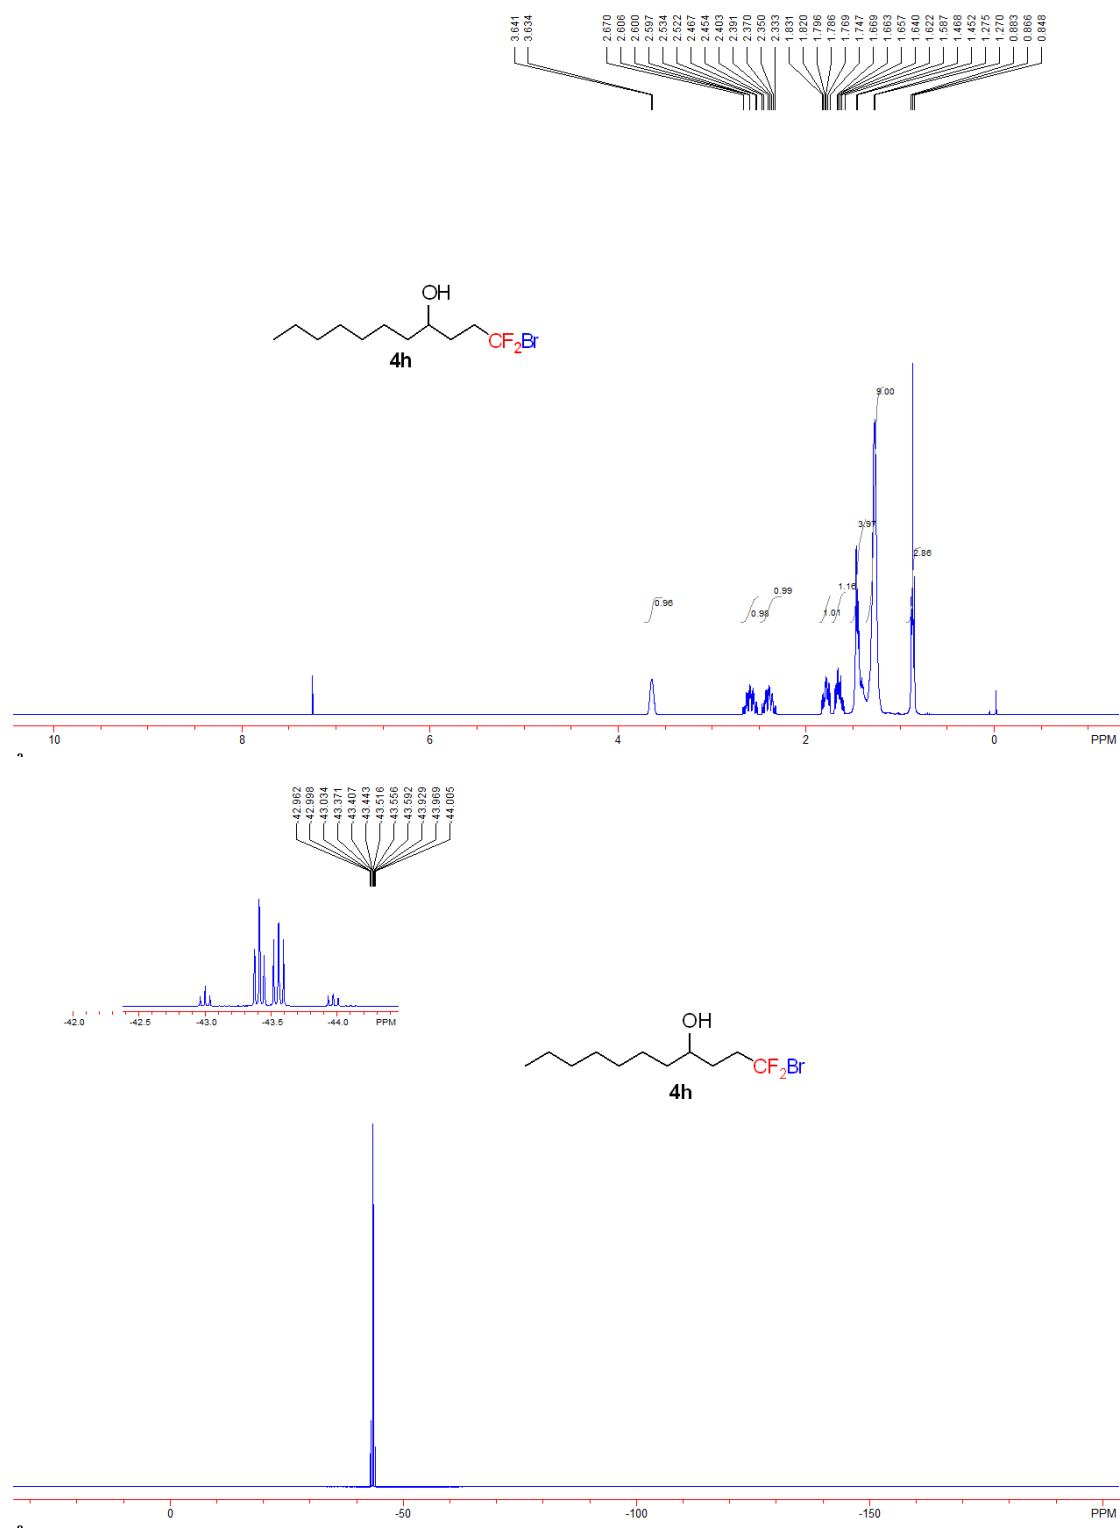



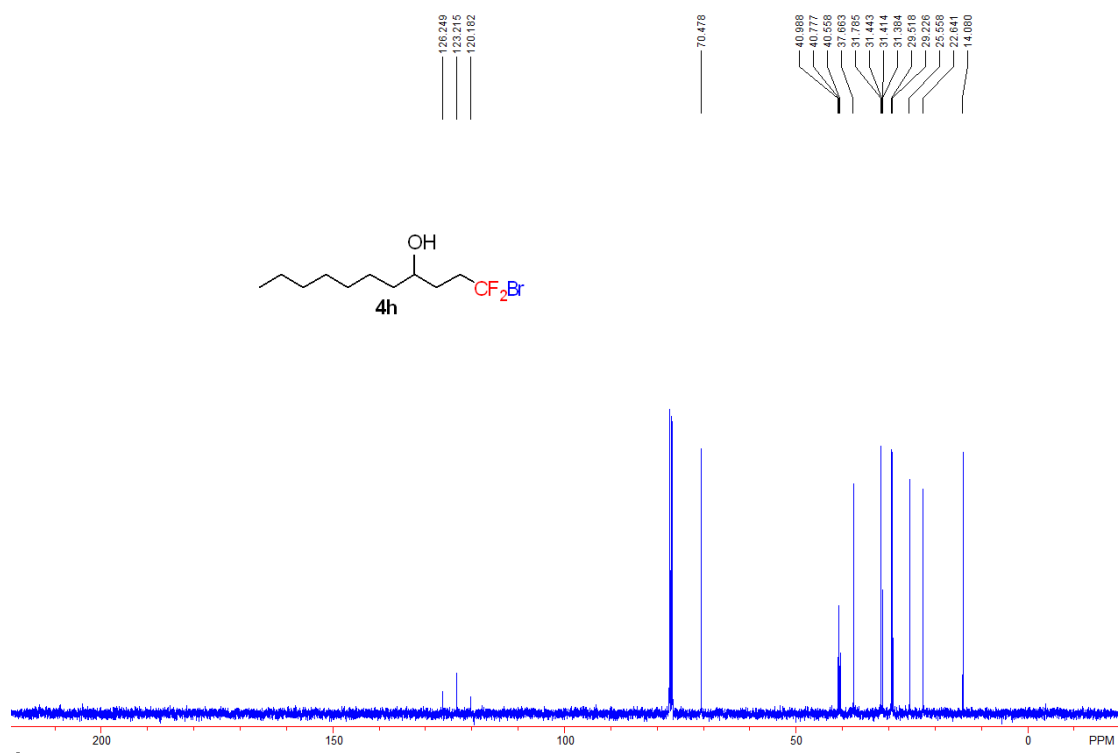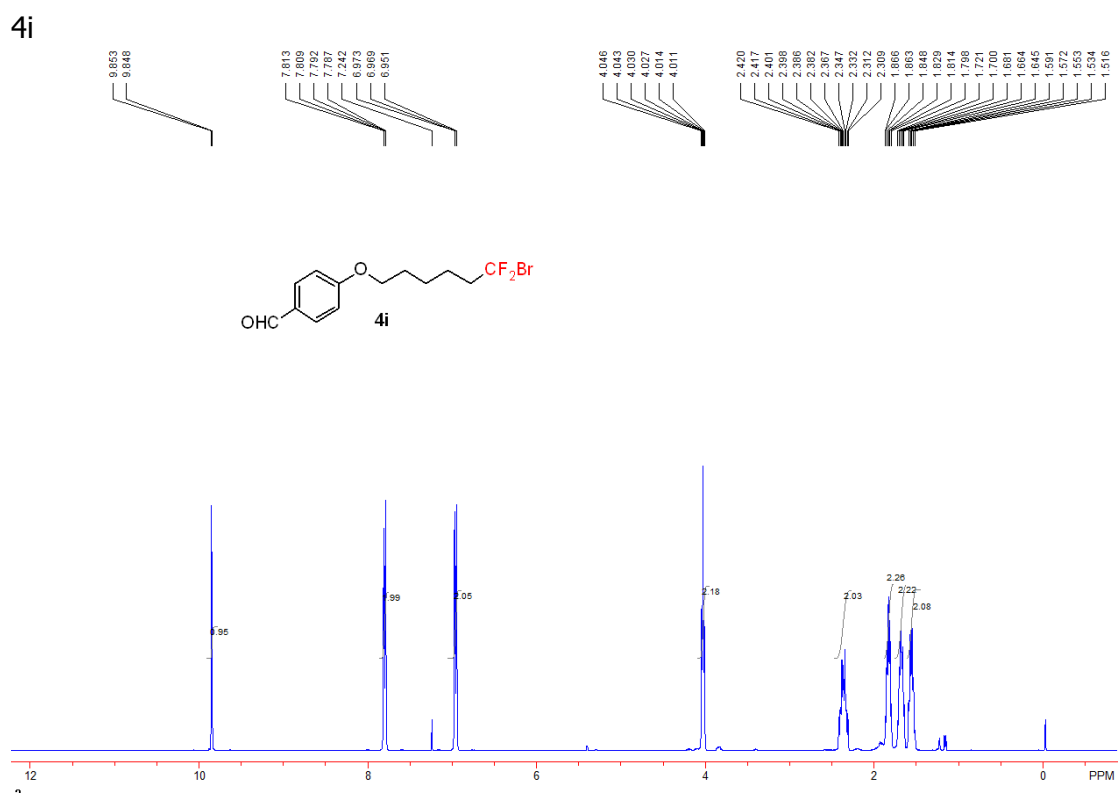

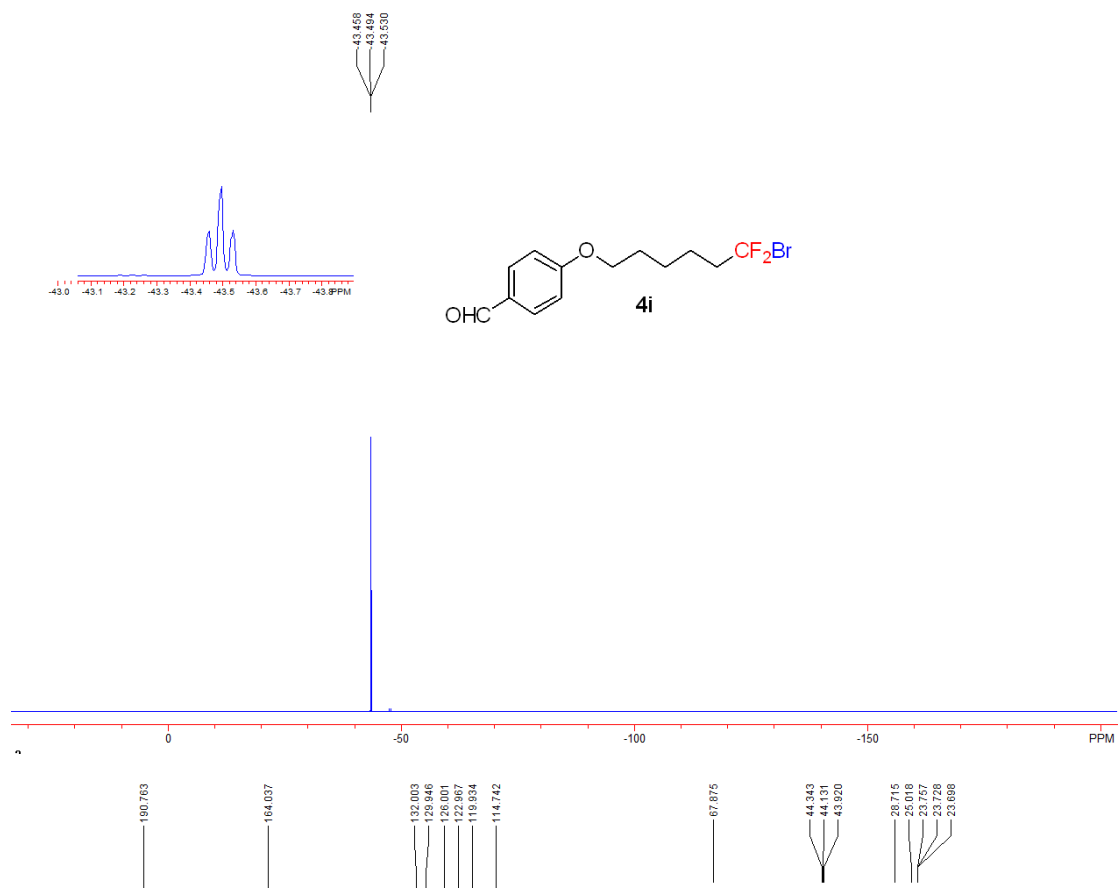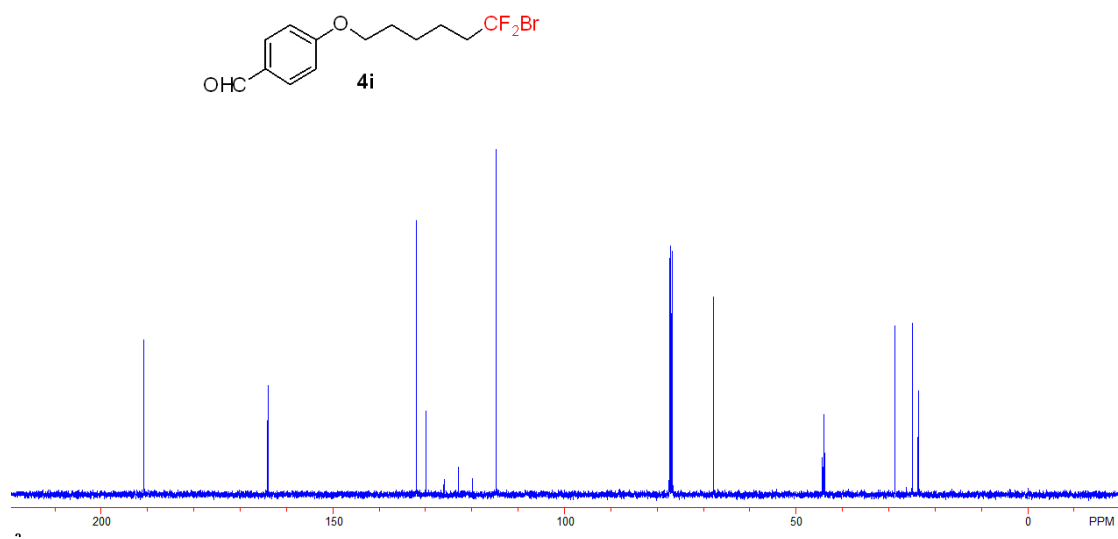

4j

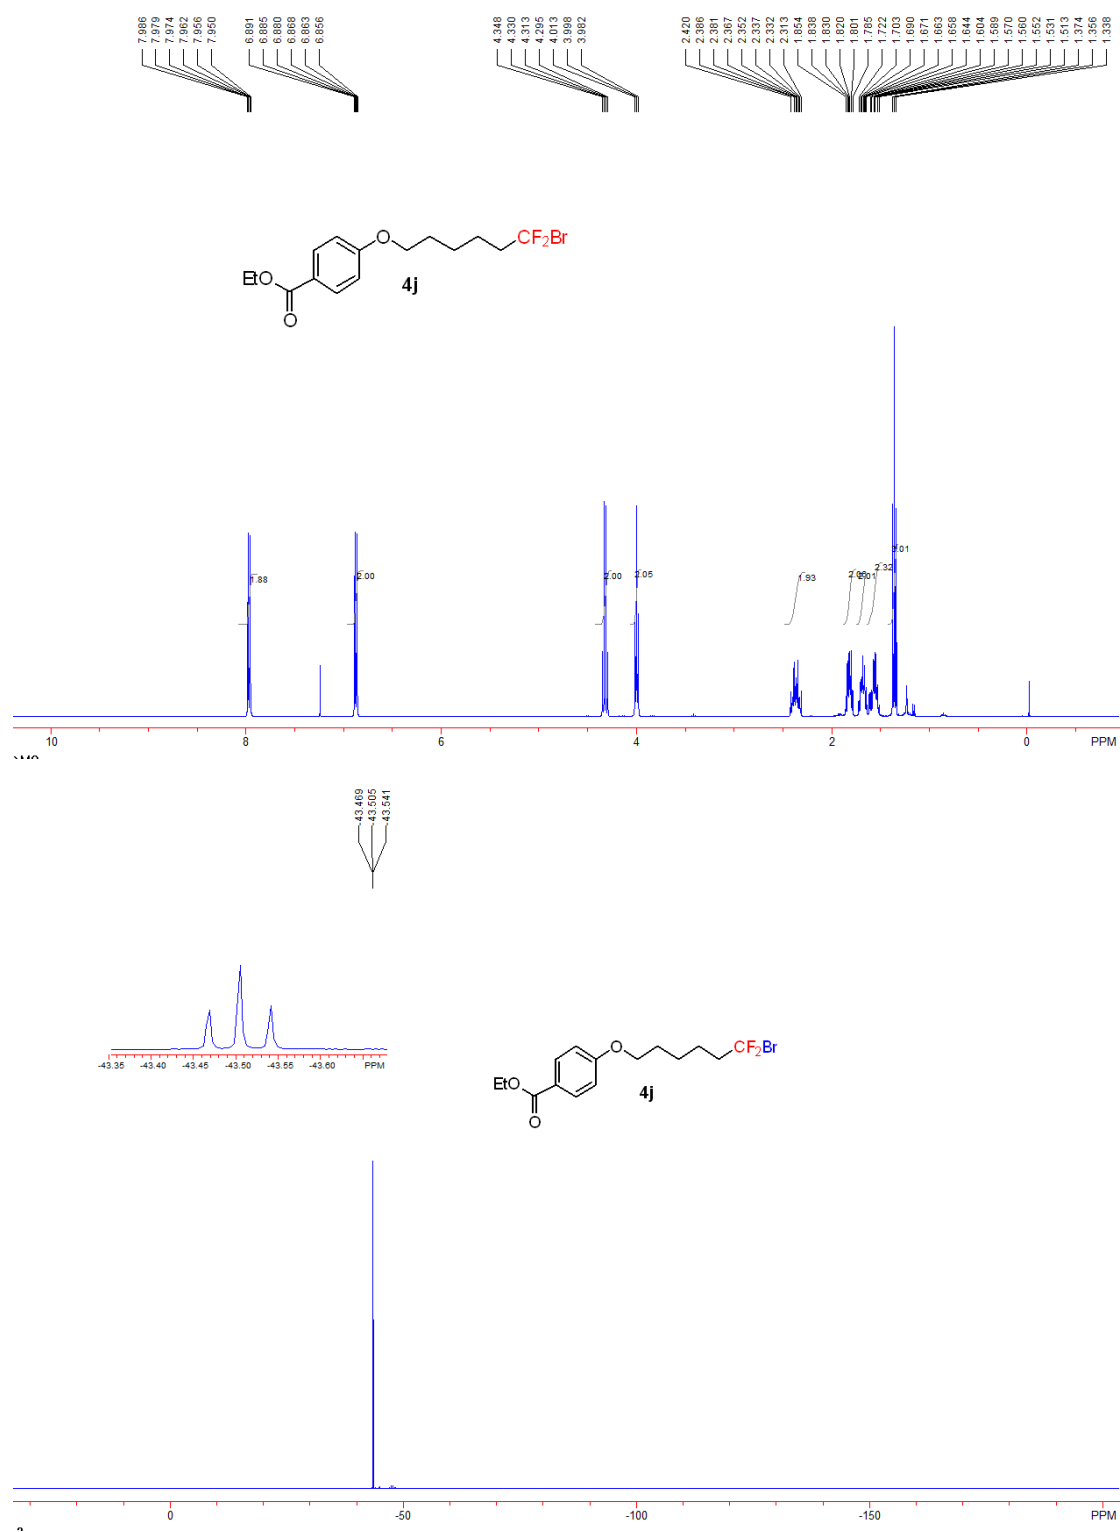

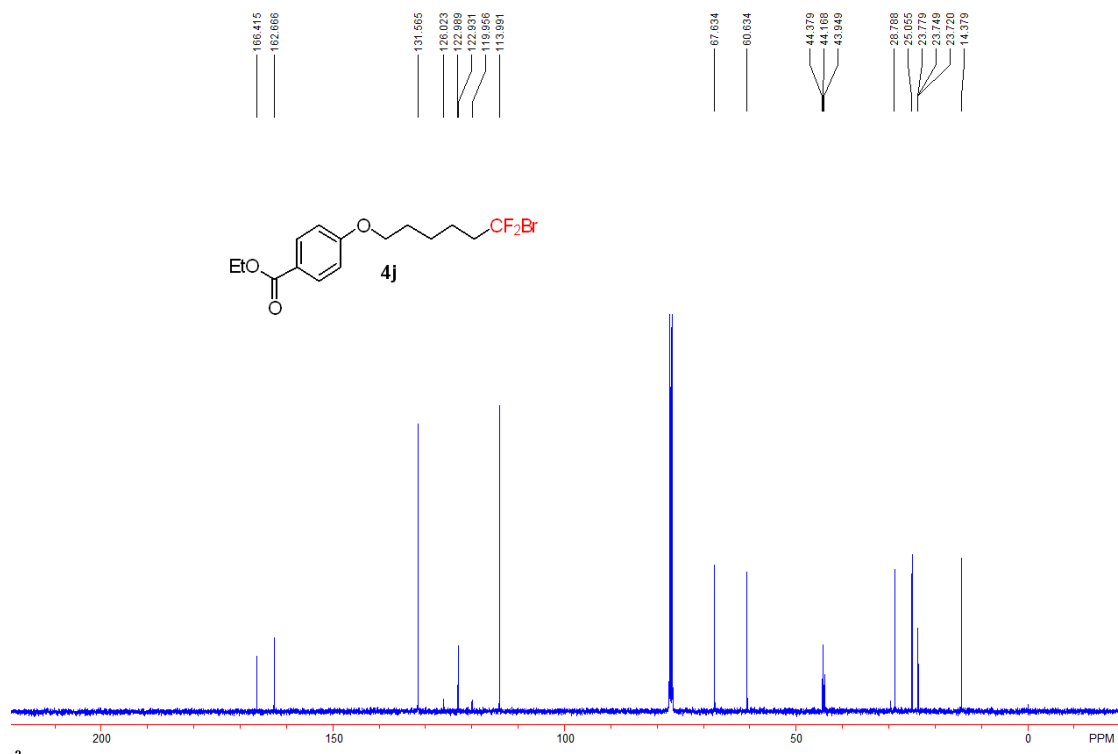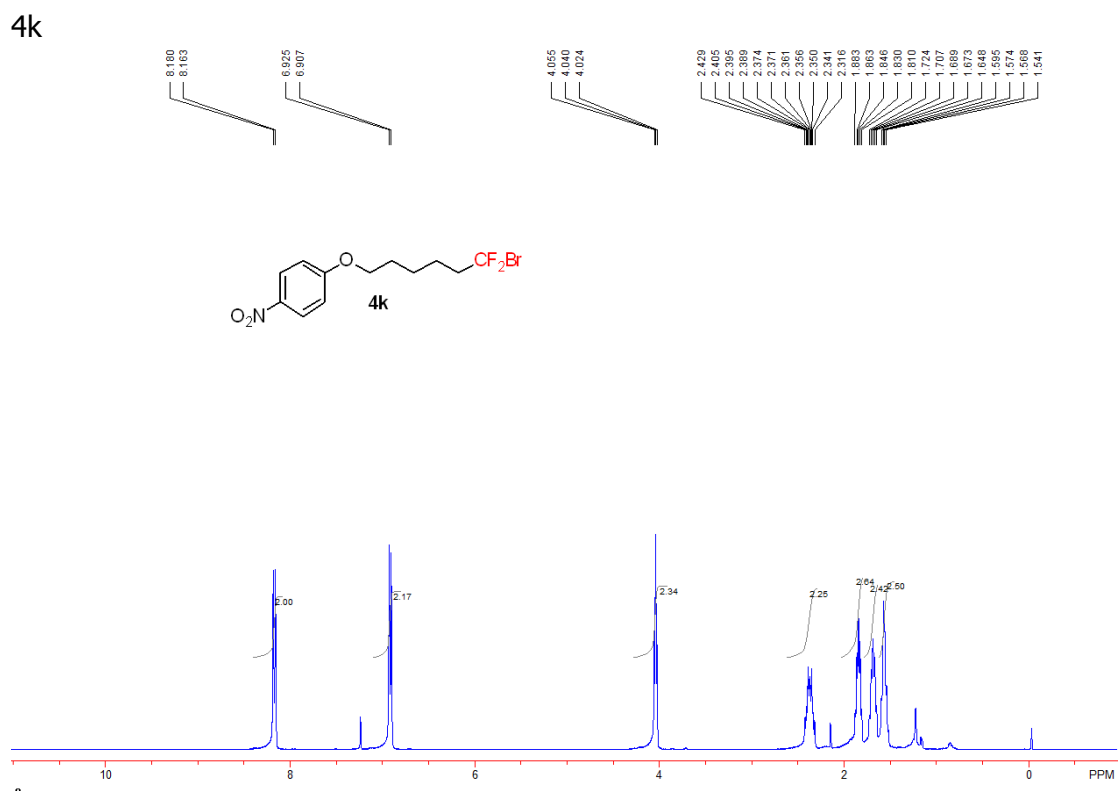

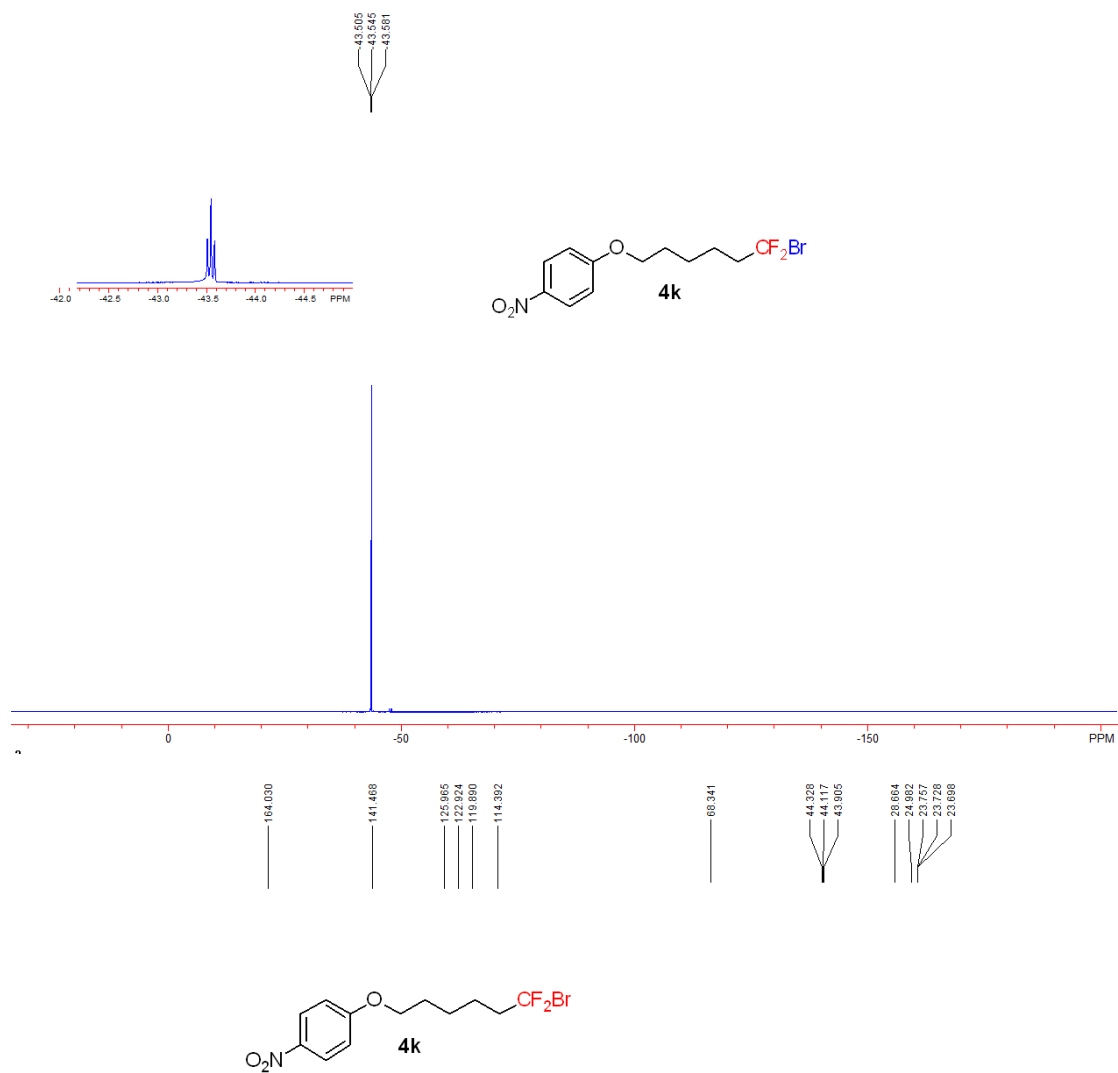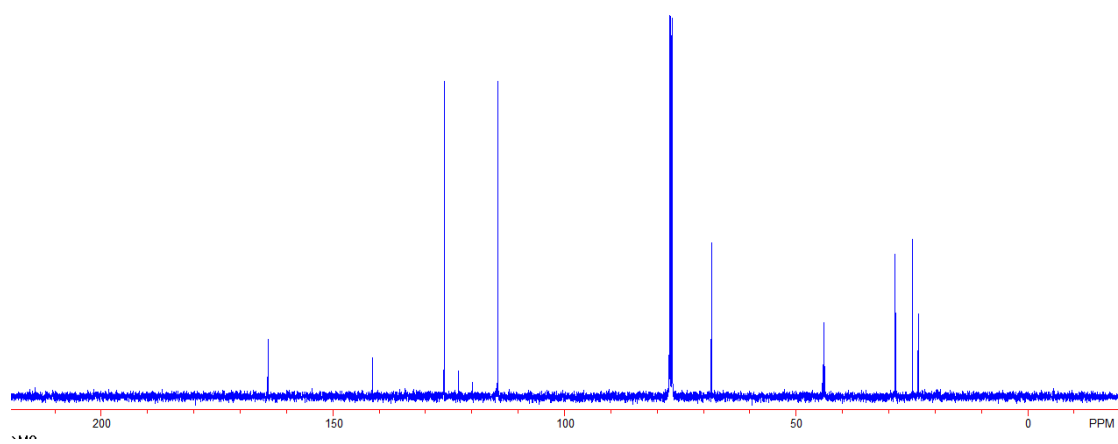

4l

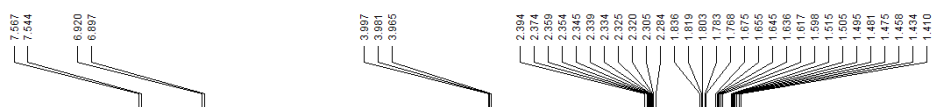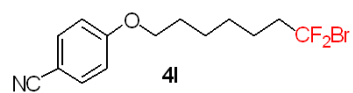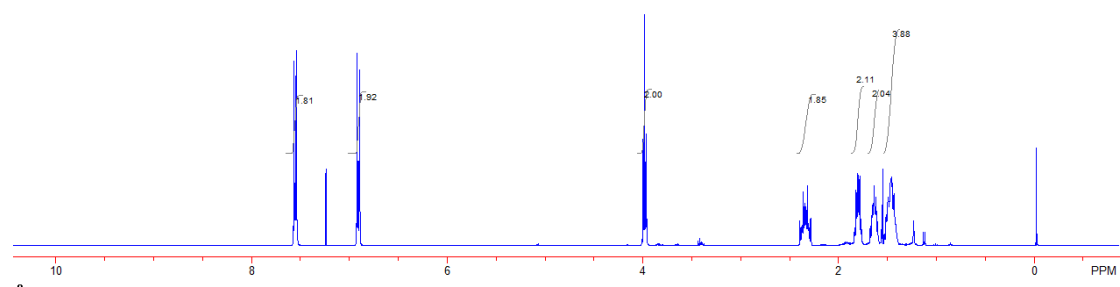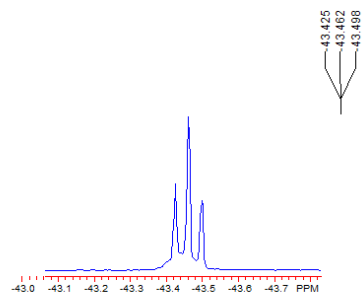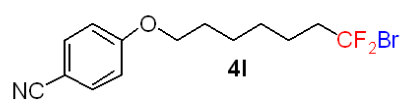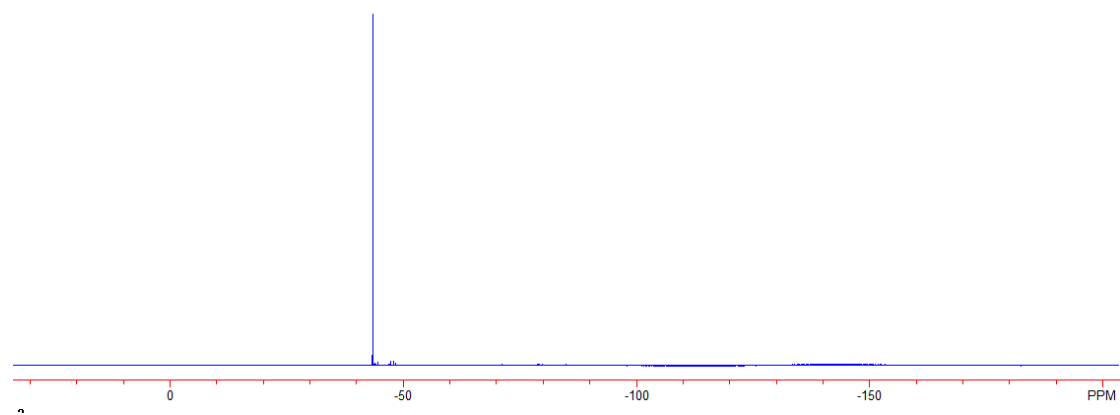

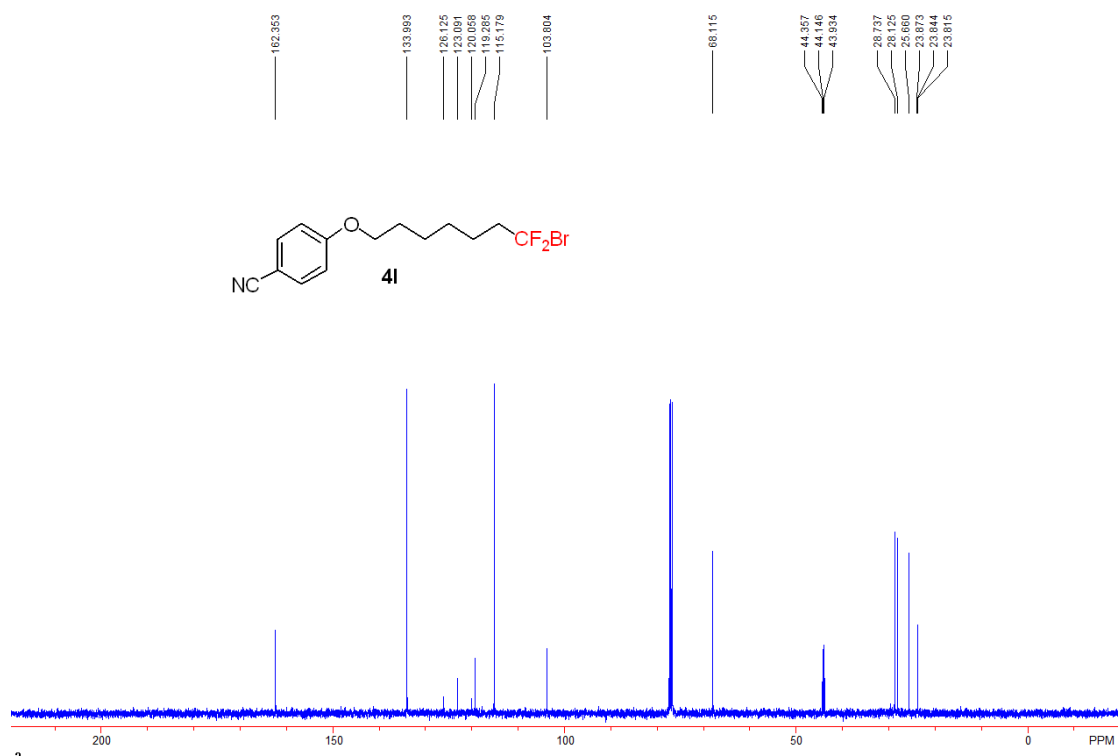

**4m**

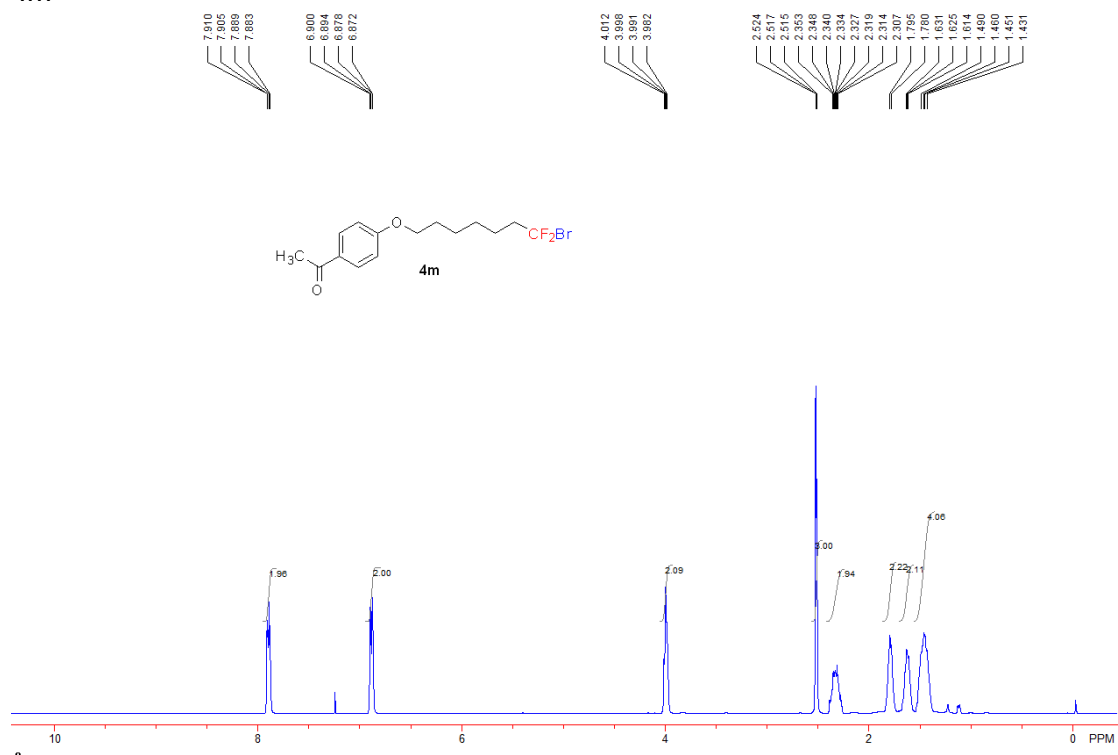

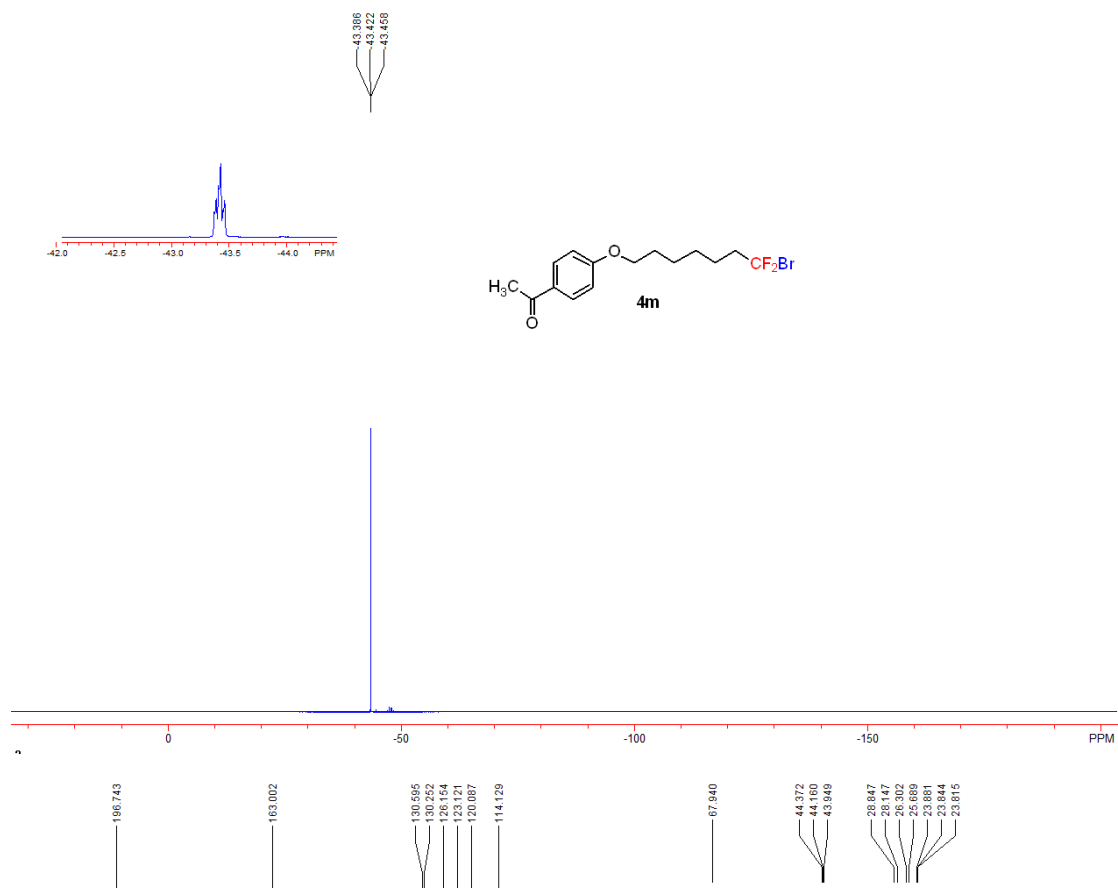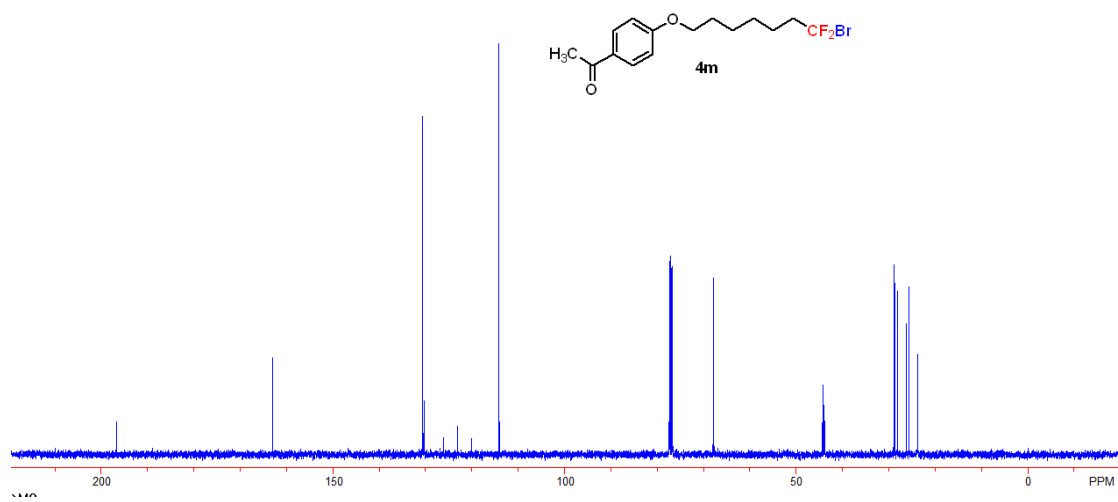

4n



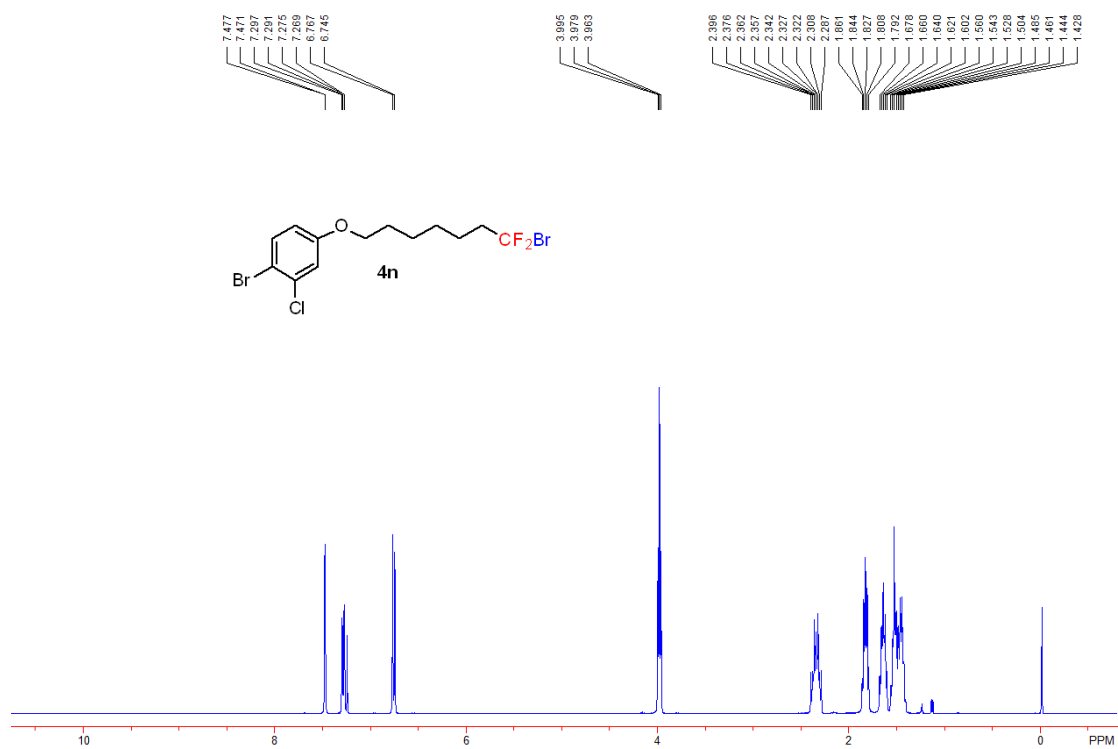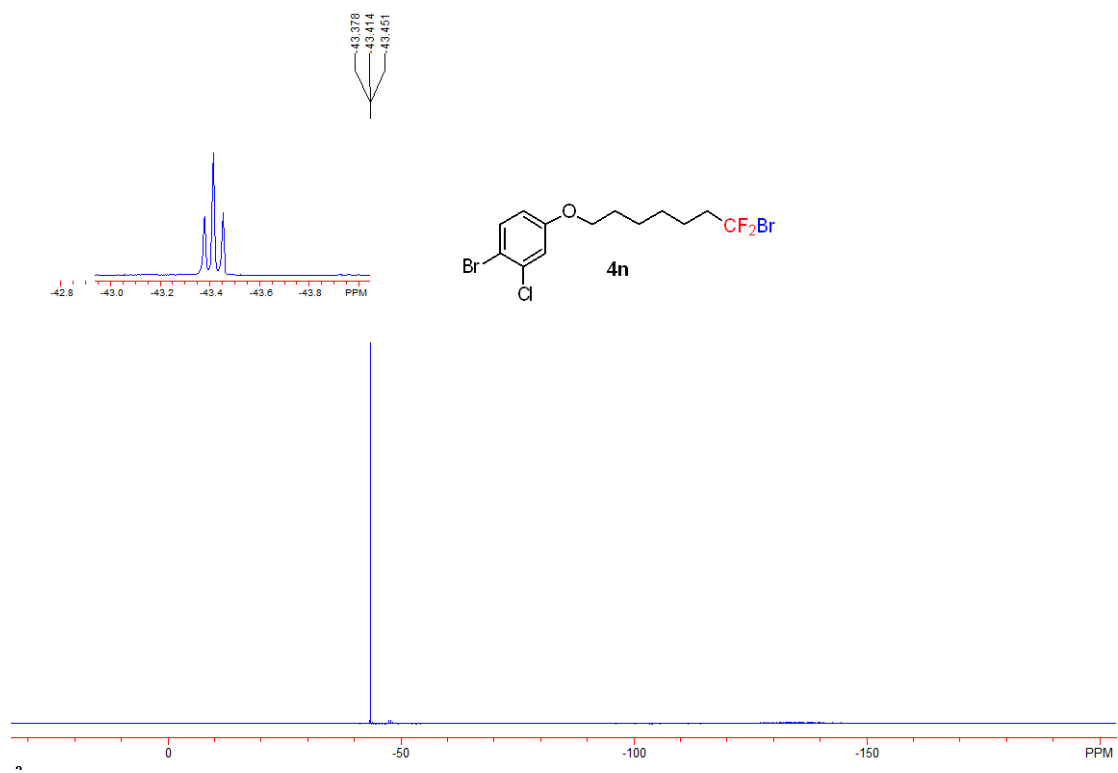

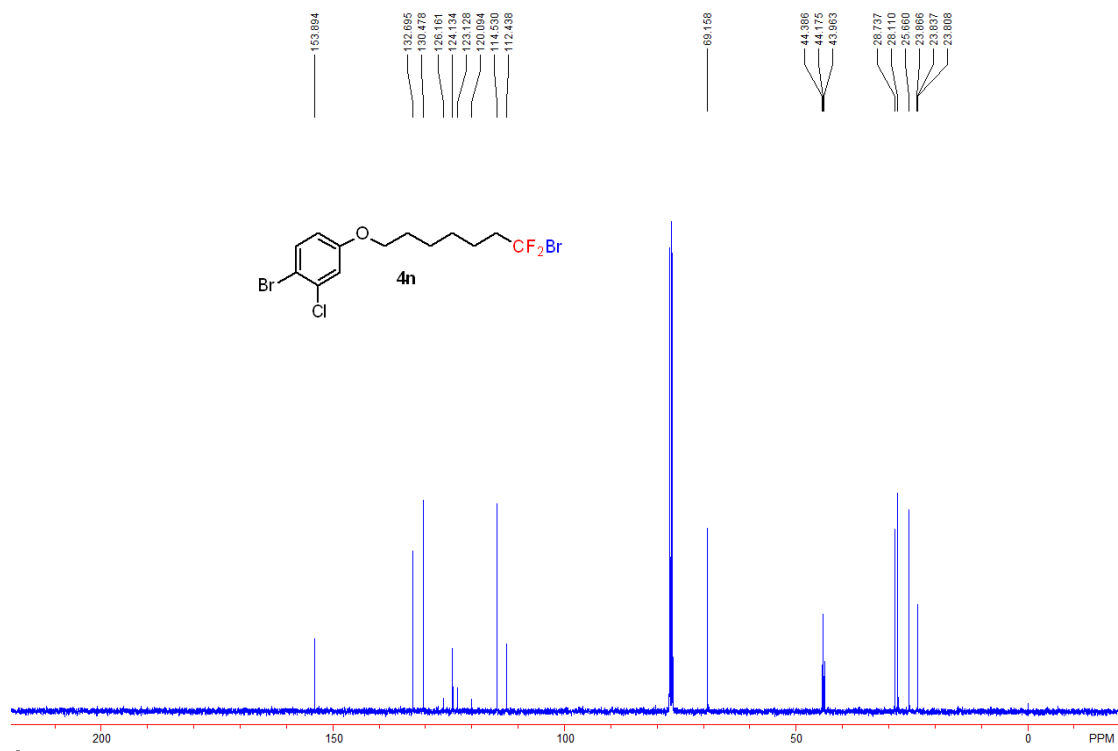

4o

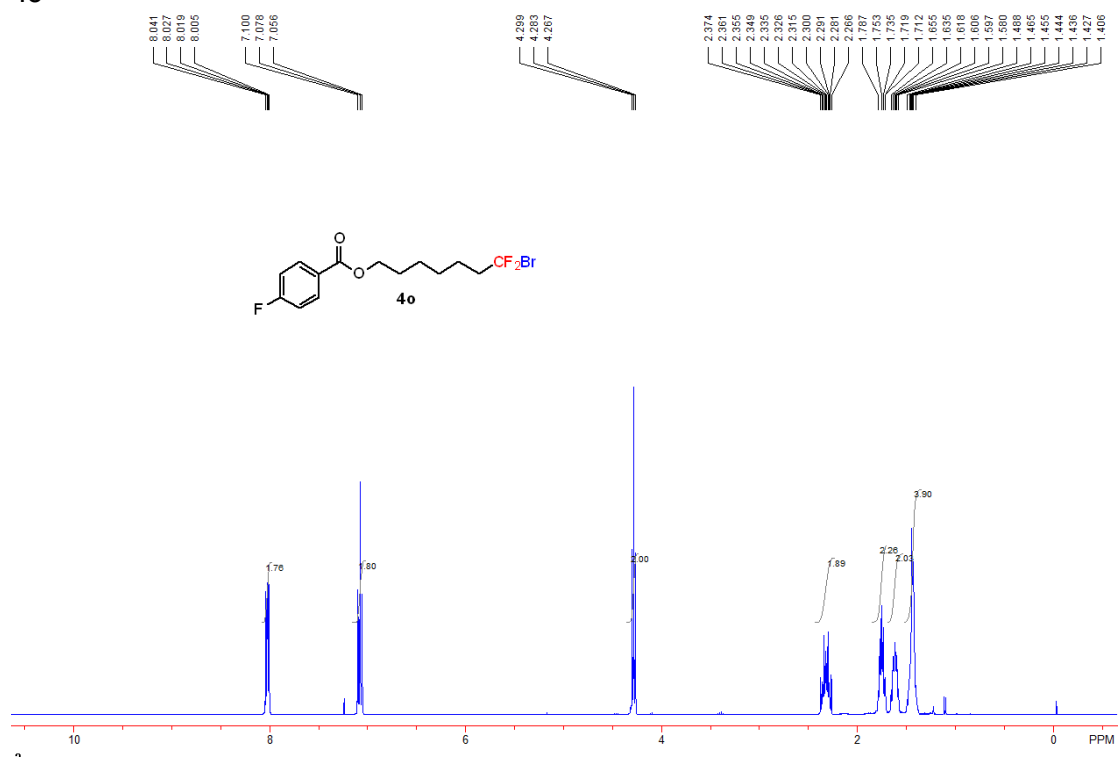

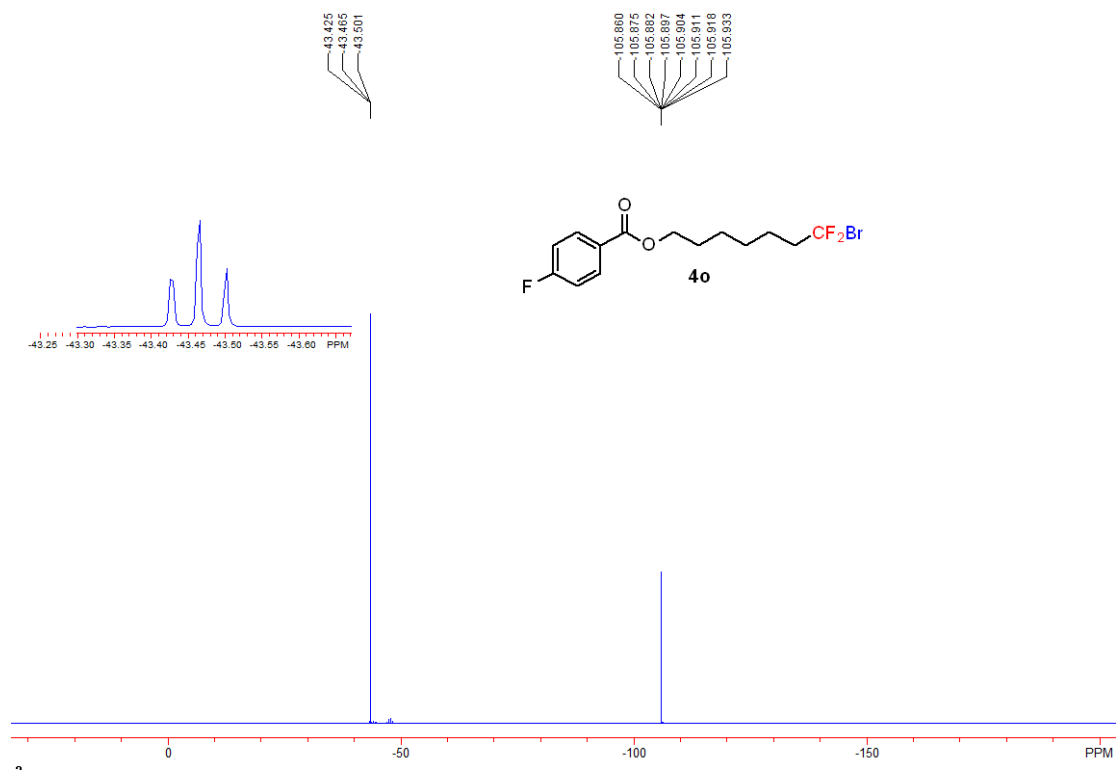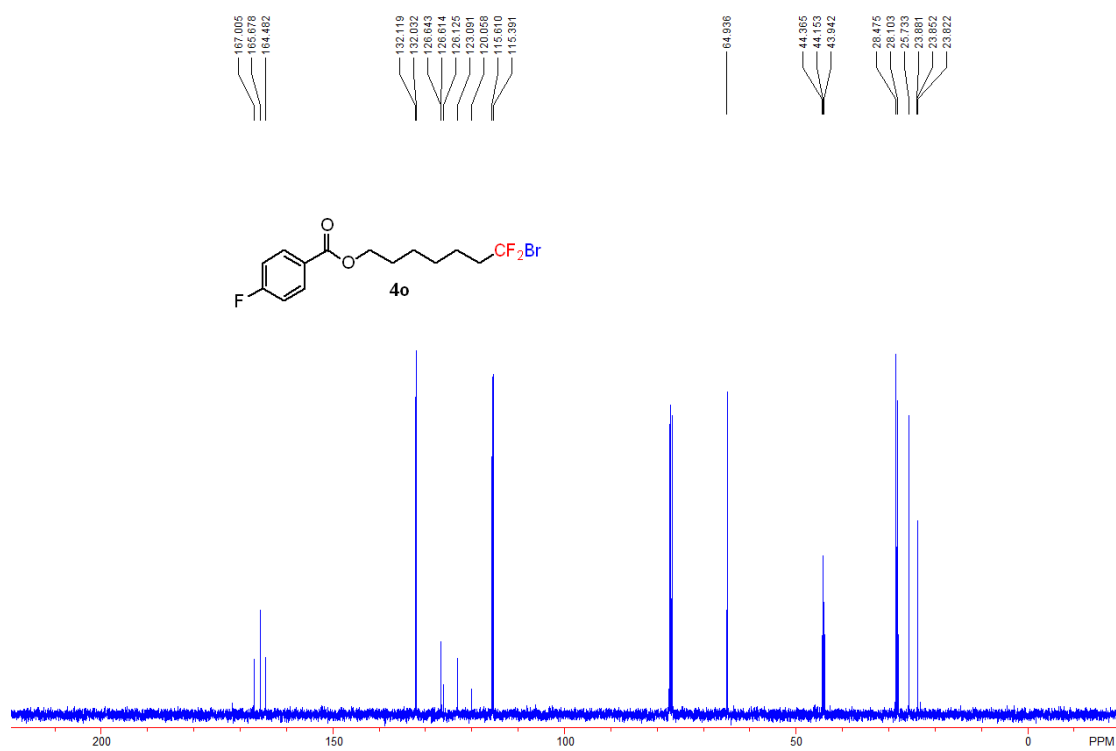

4p

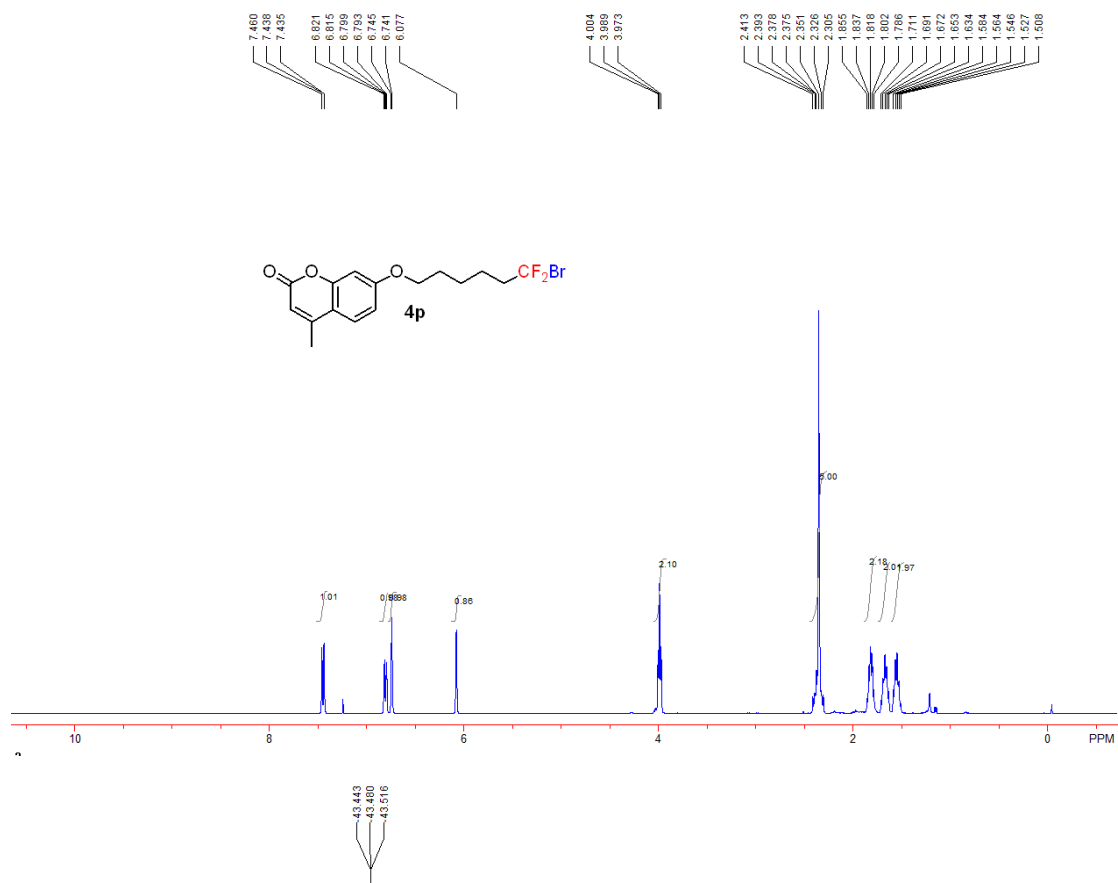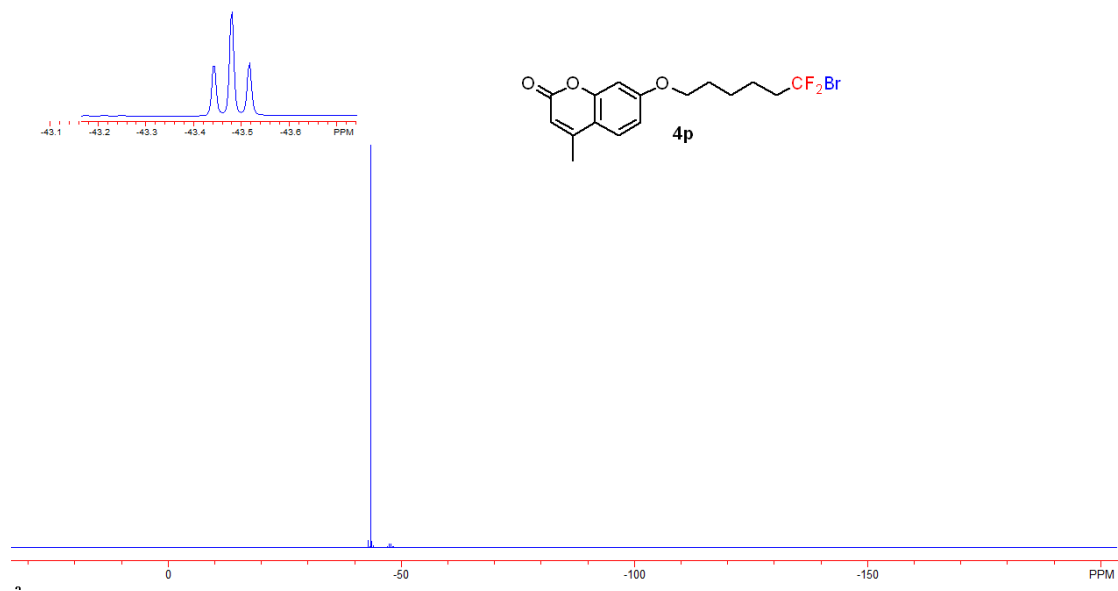

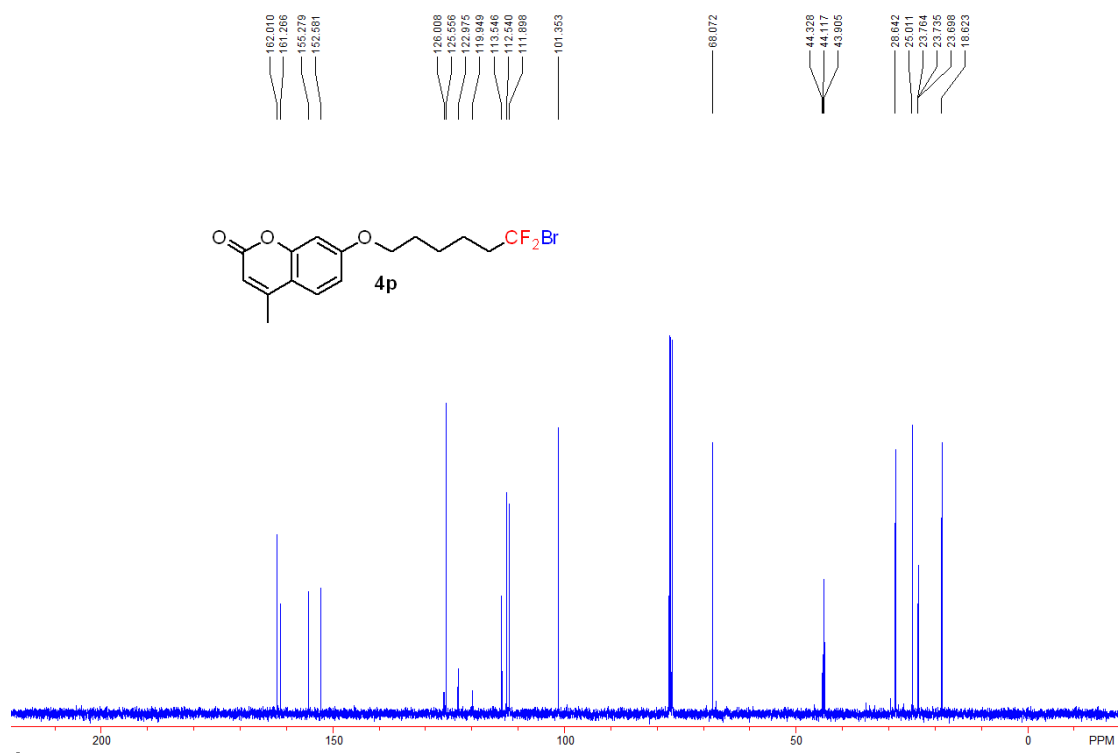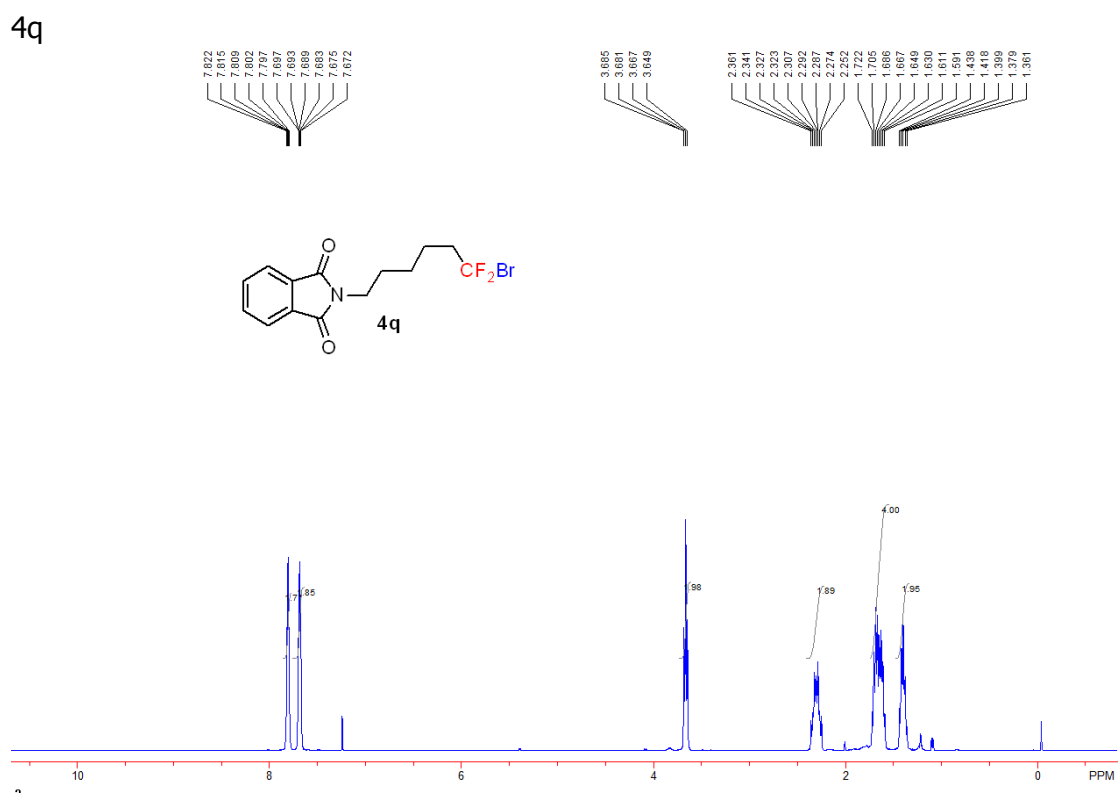

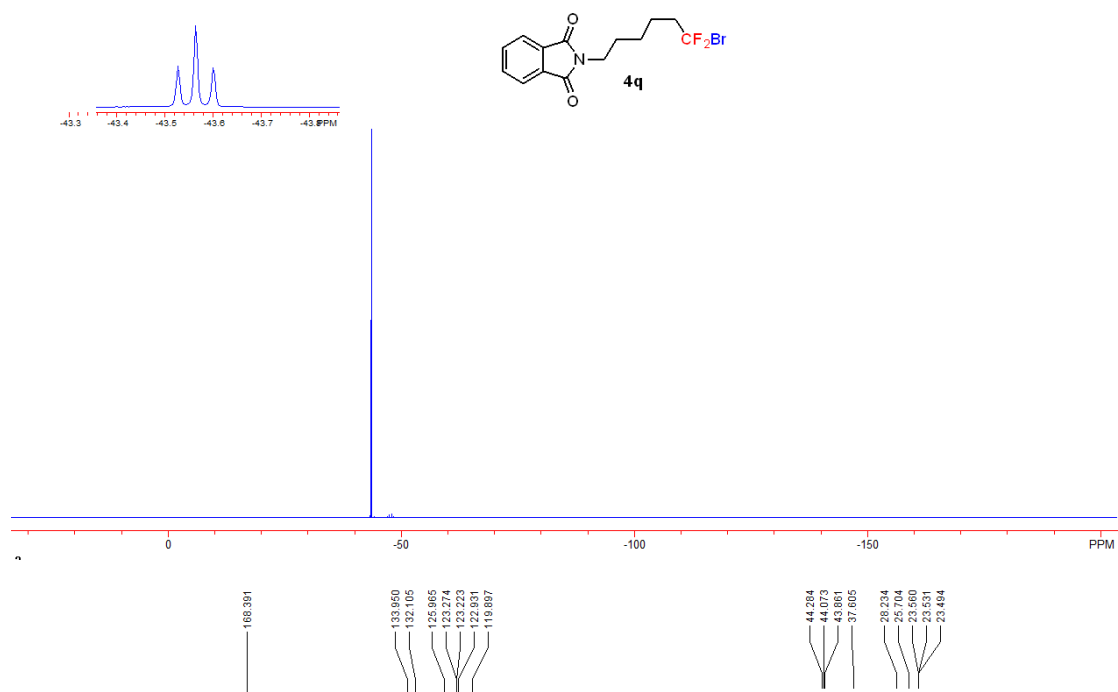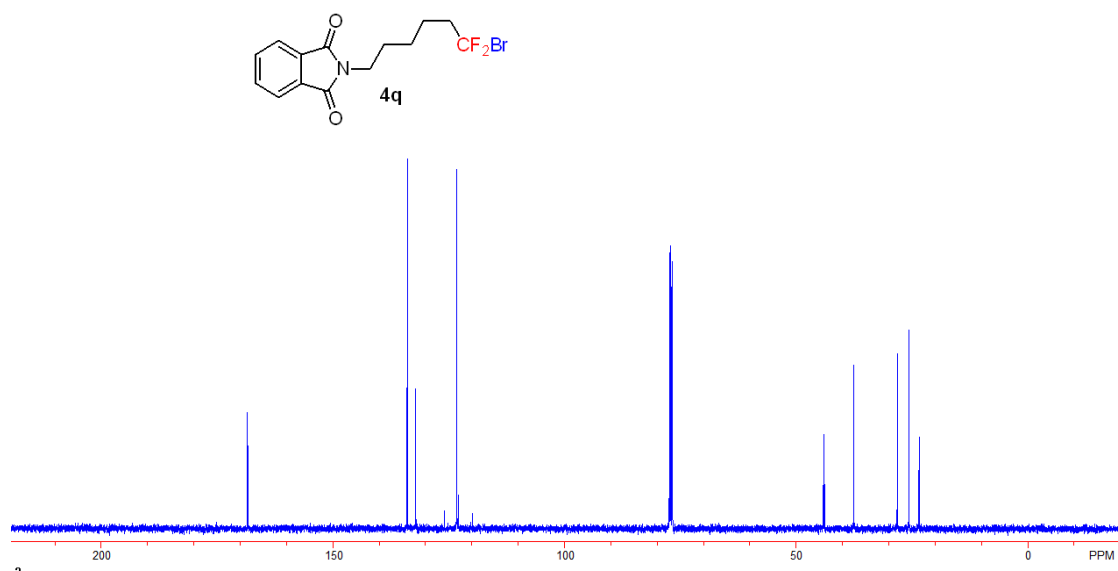

4r

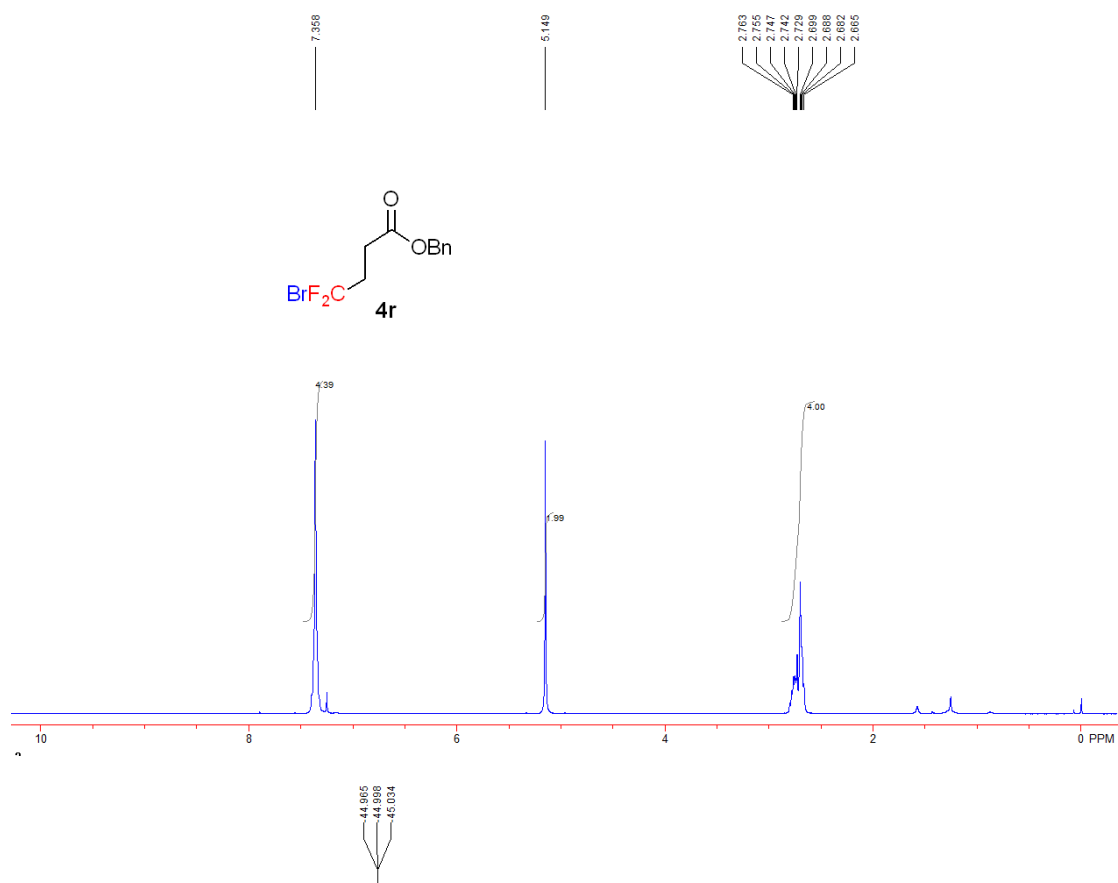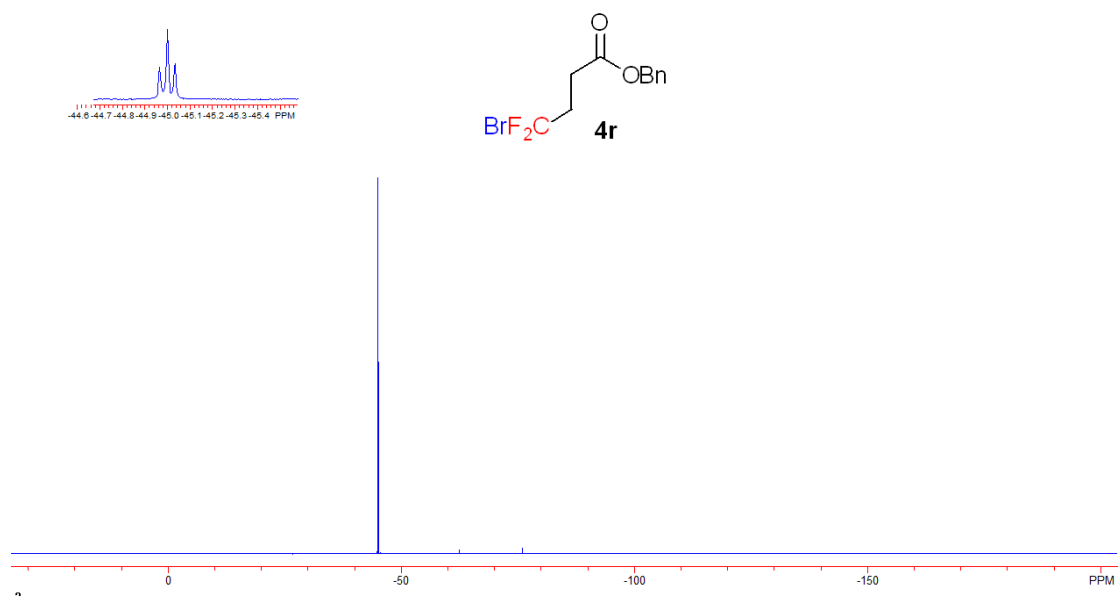

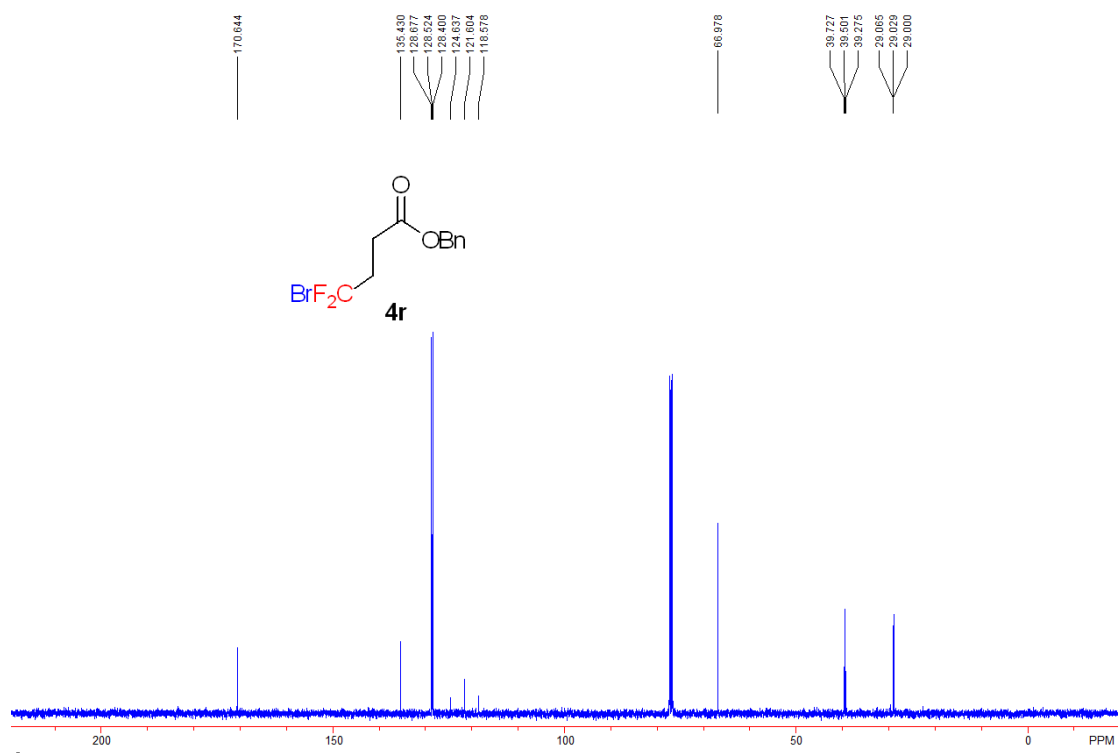

**4s**

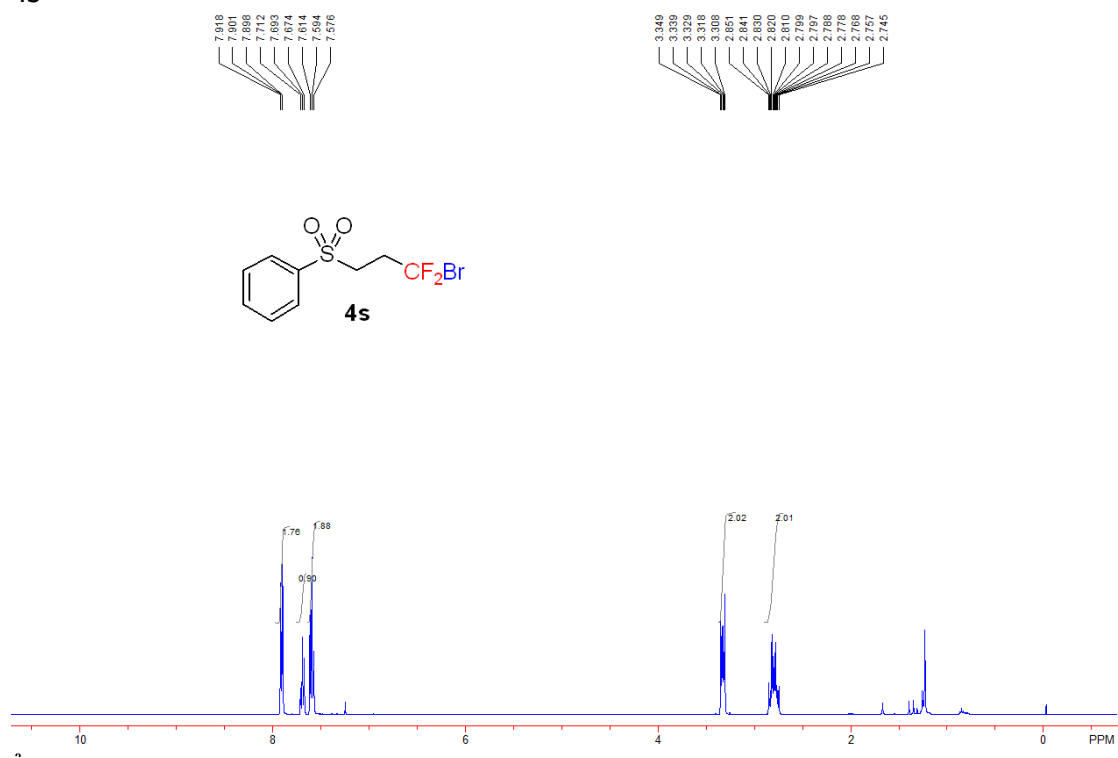



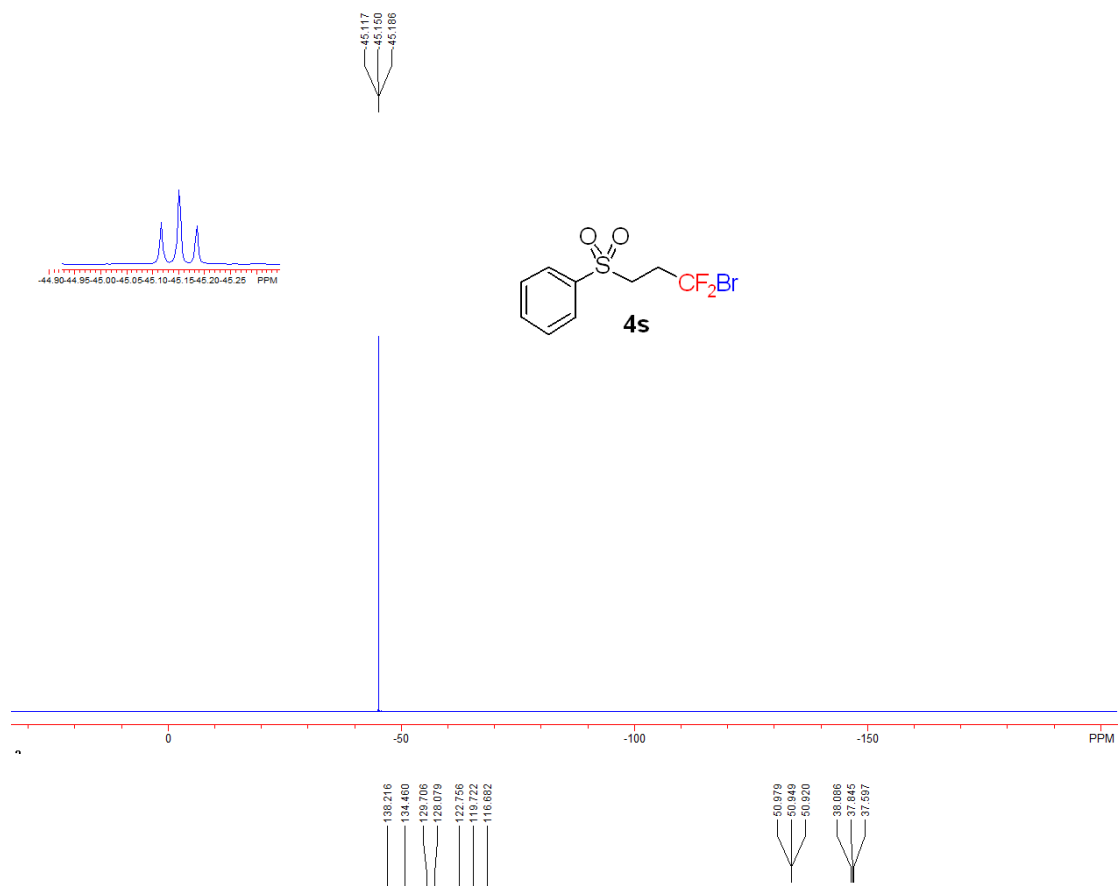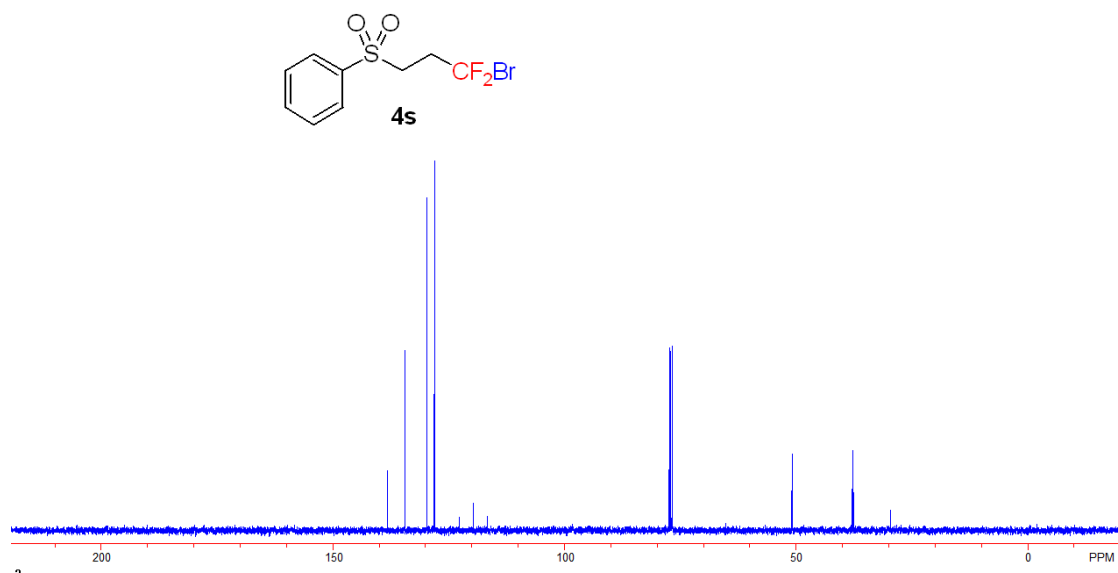

4t

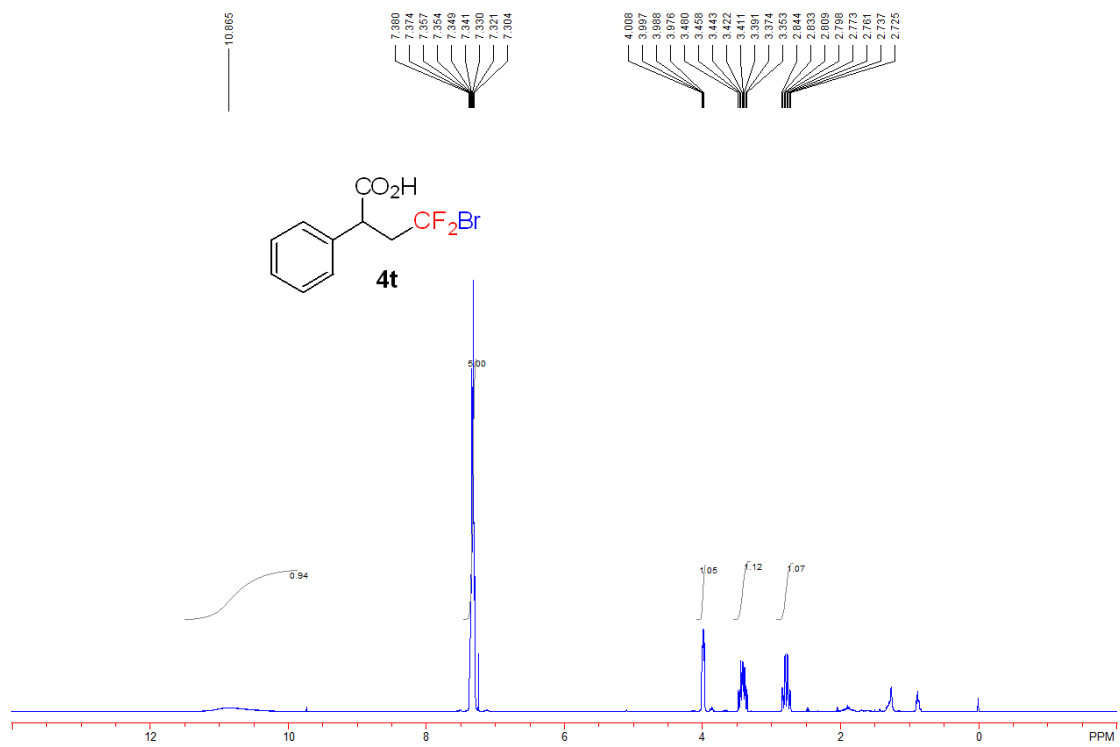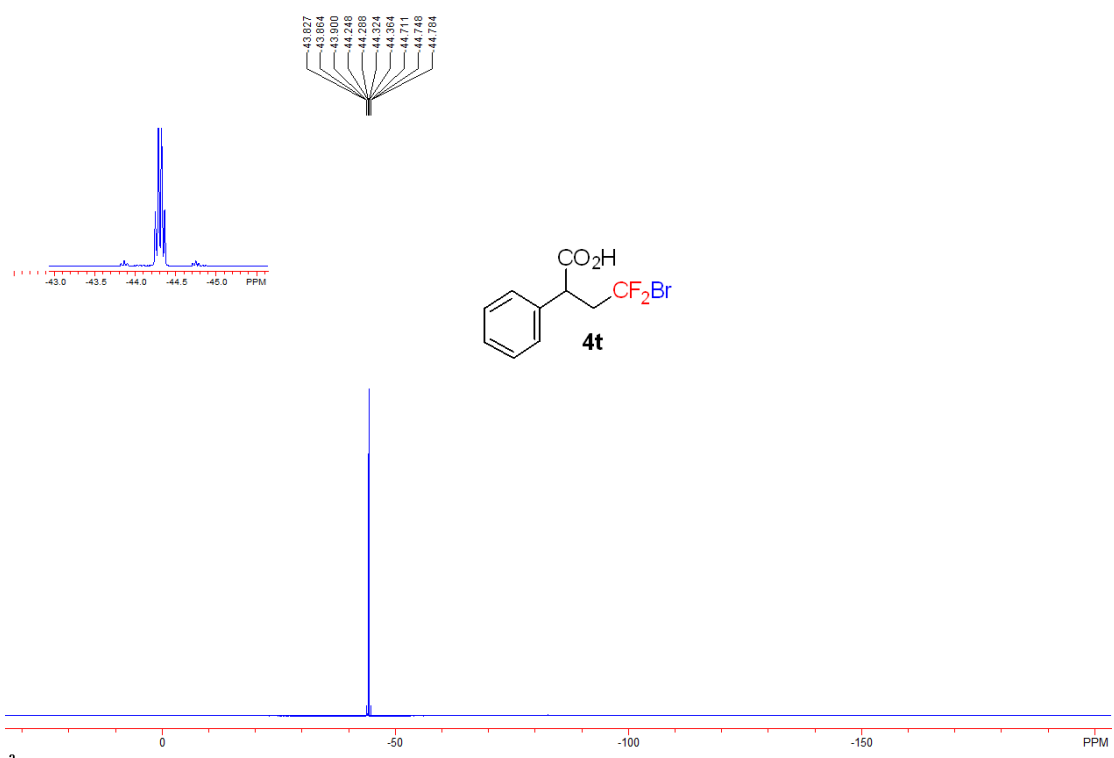

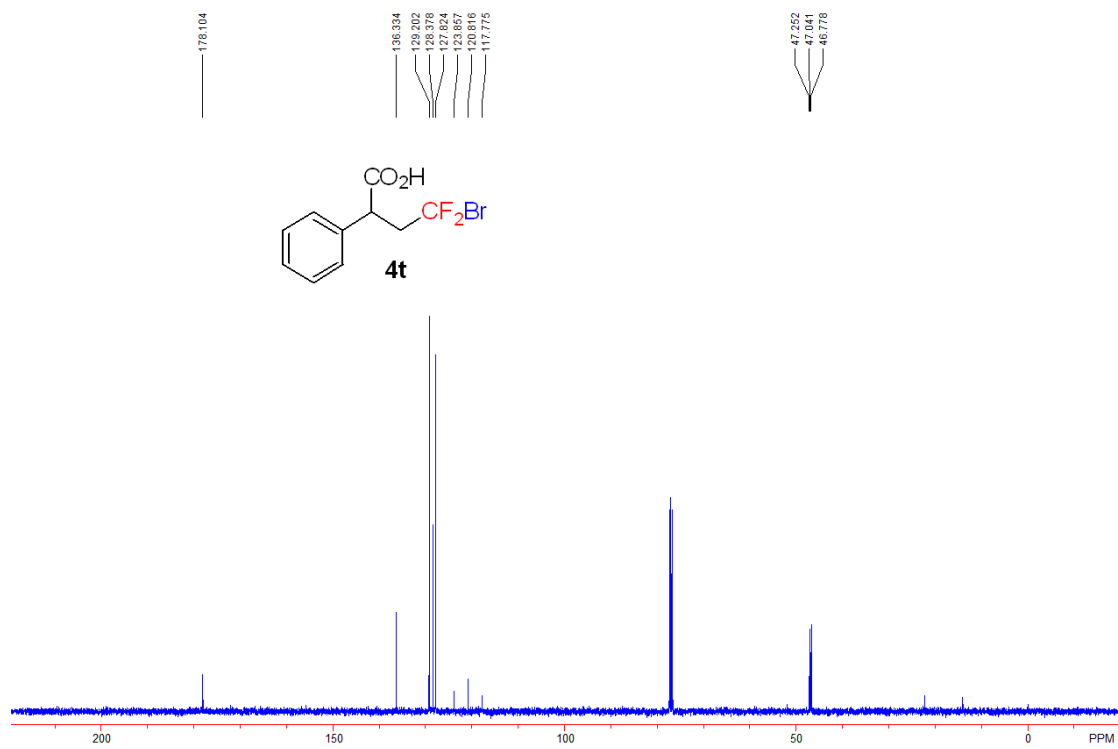

**4u**

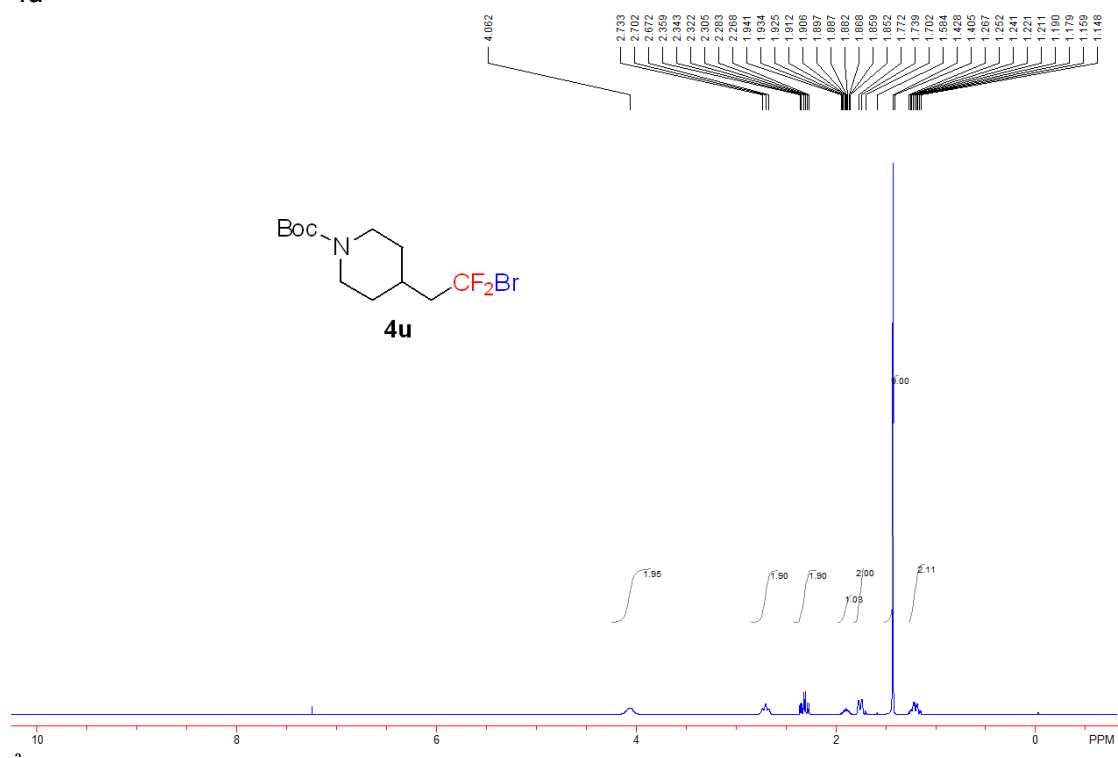

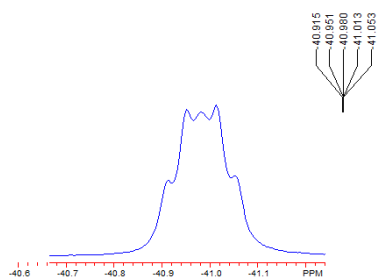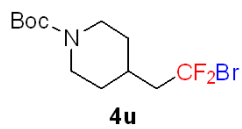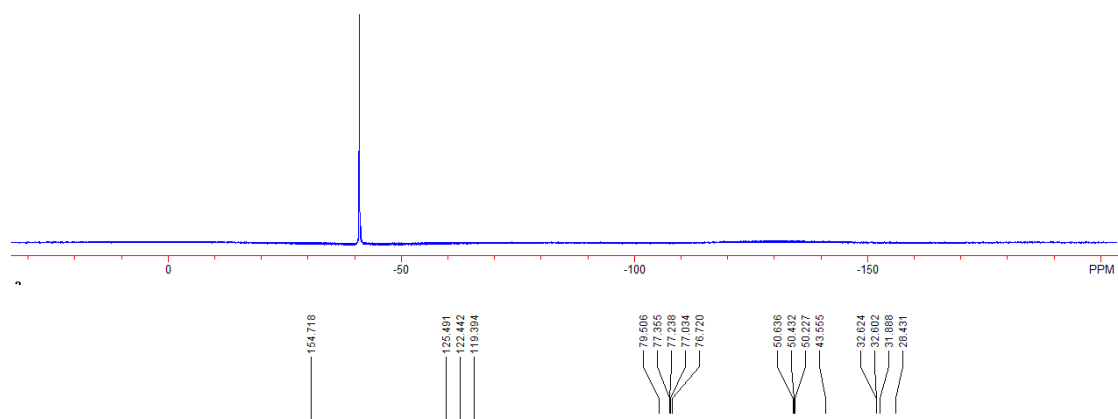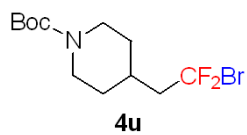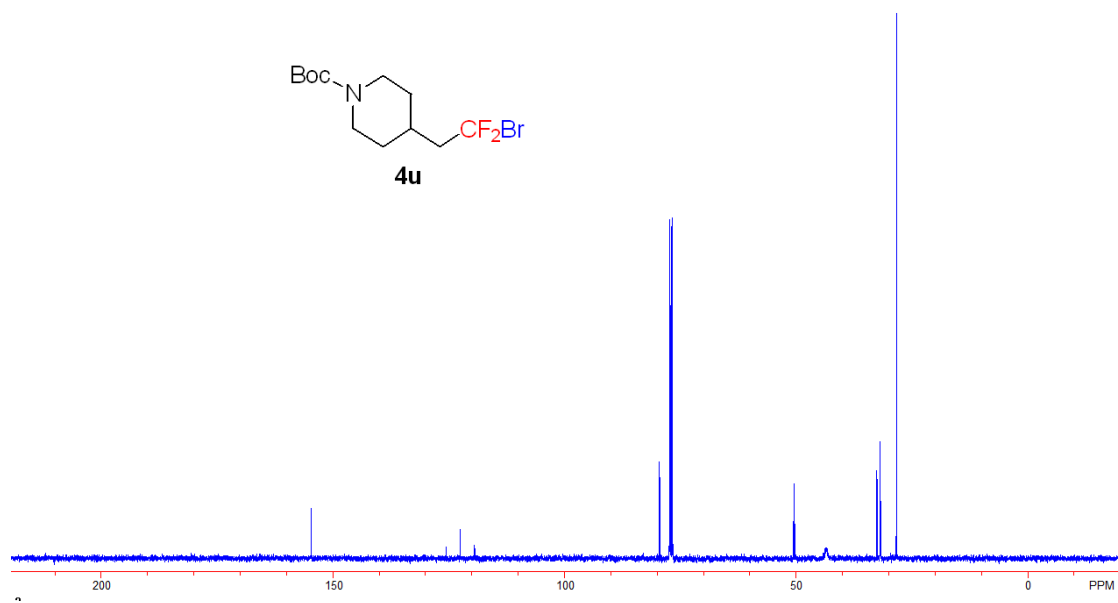

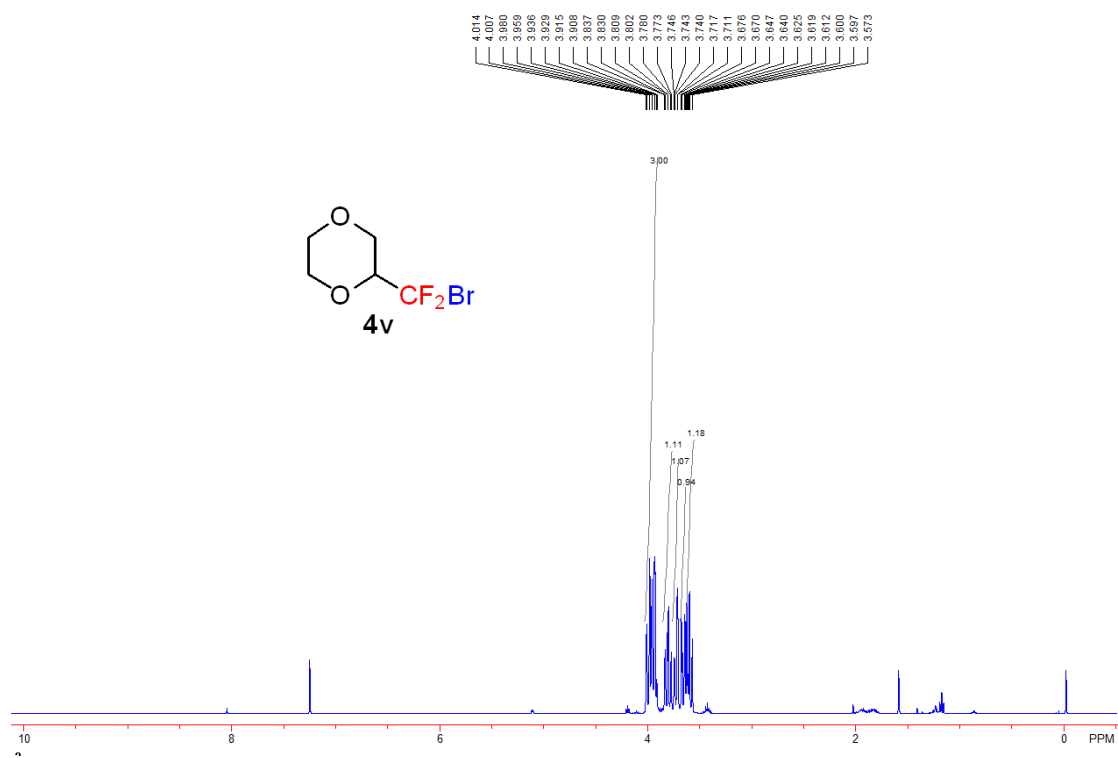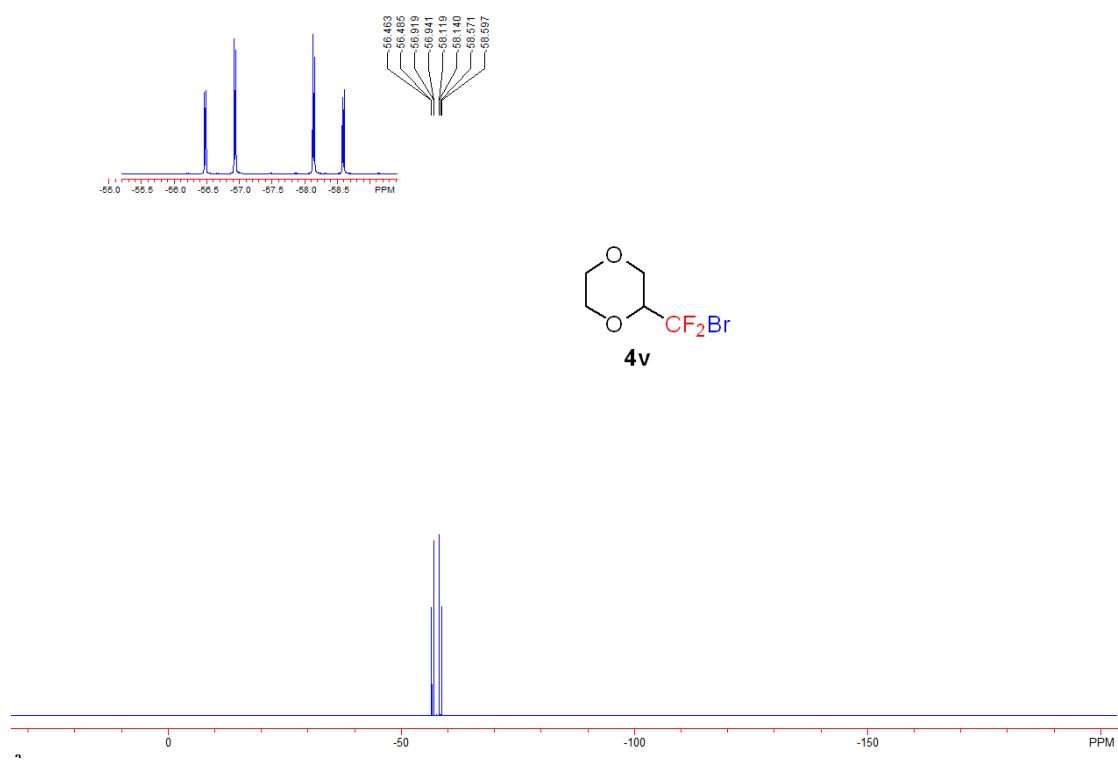

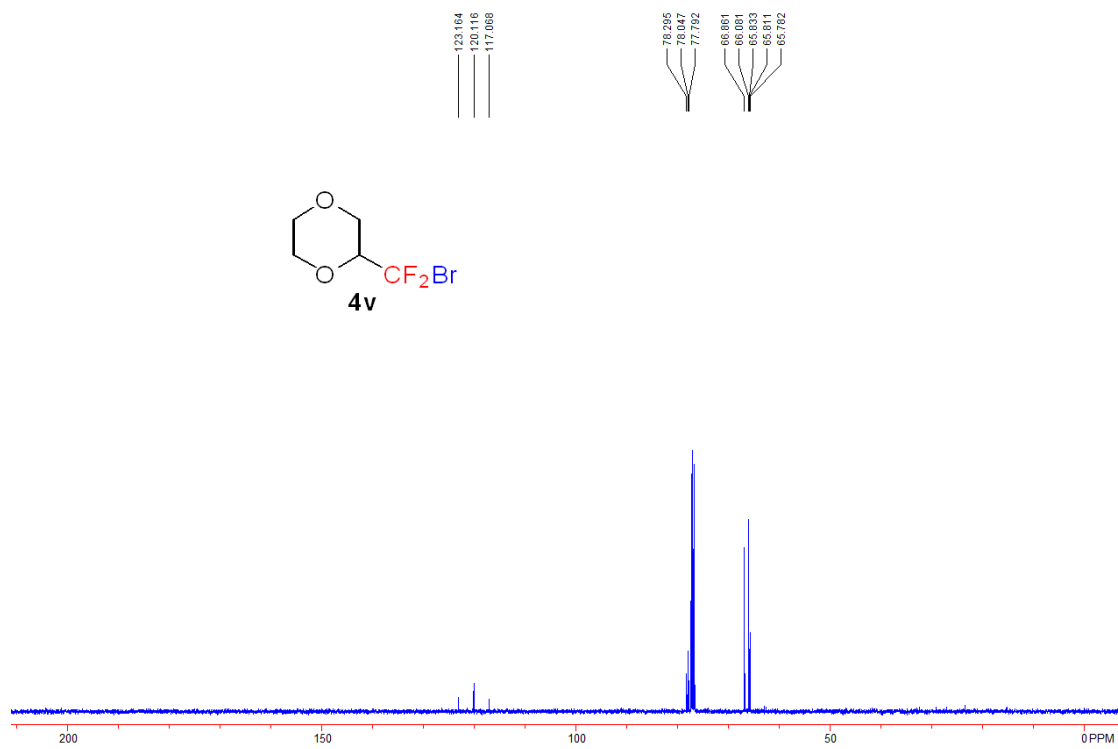

**4w**

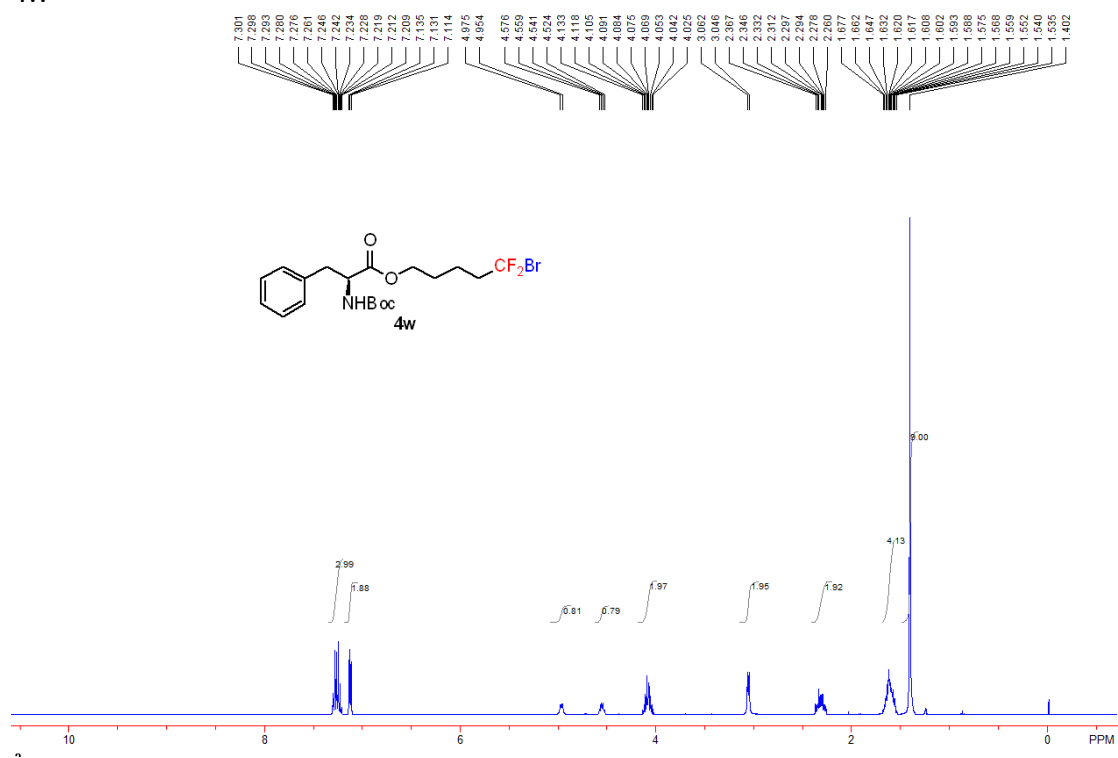

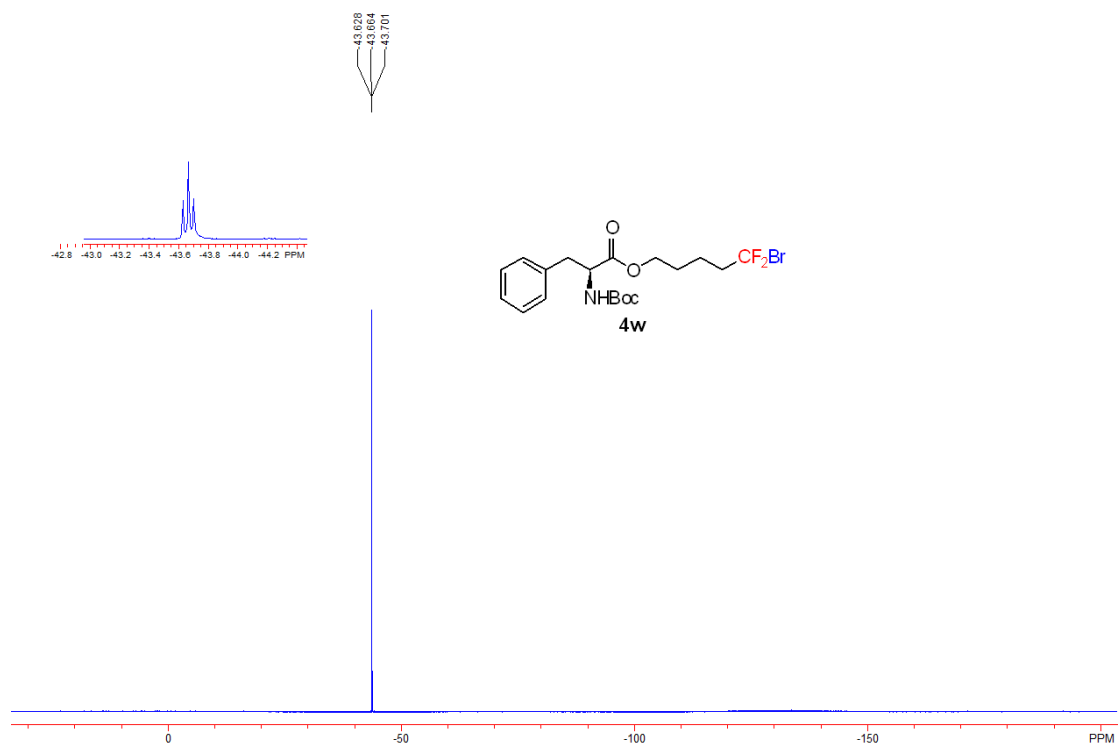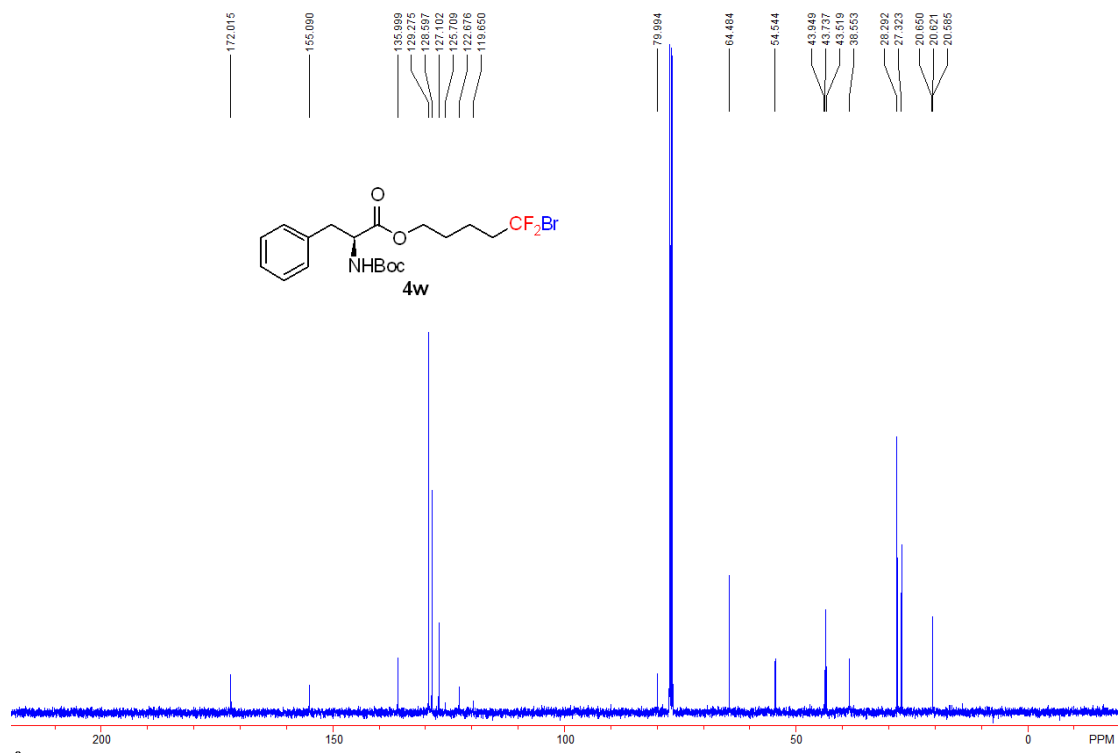

4x

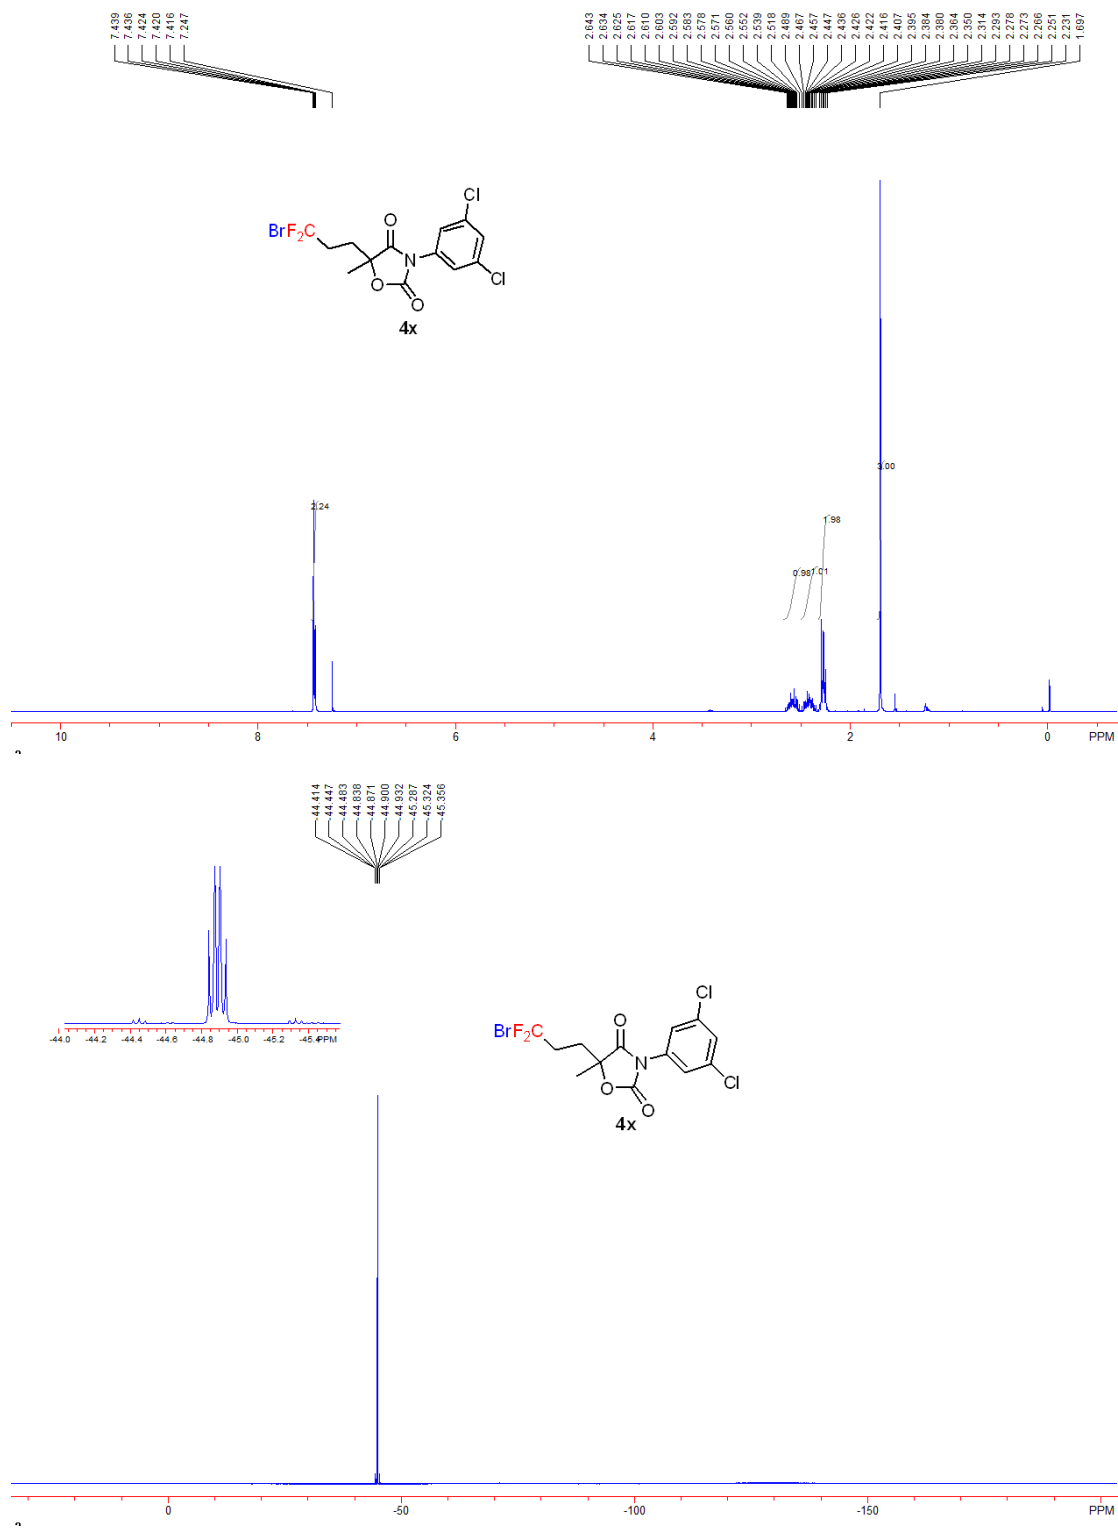



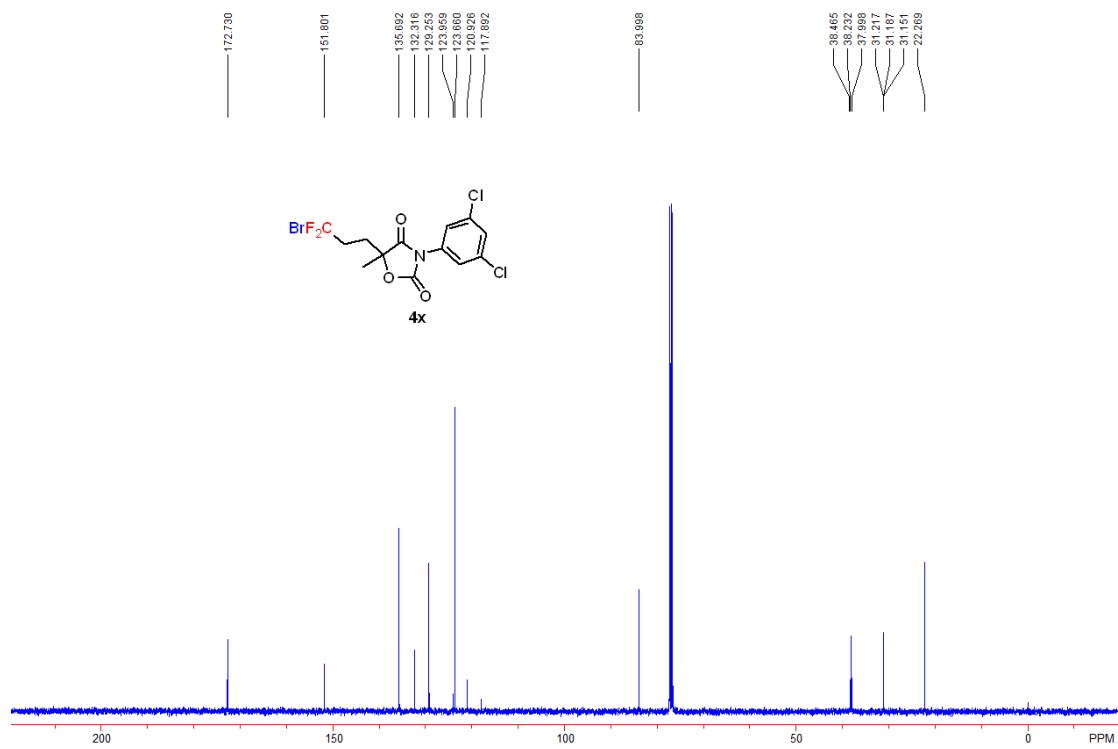

**4y**

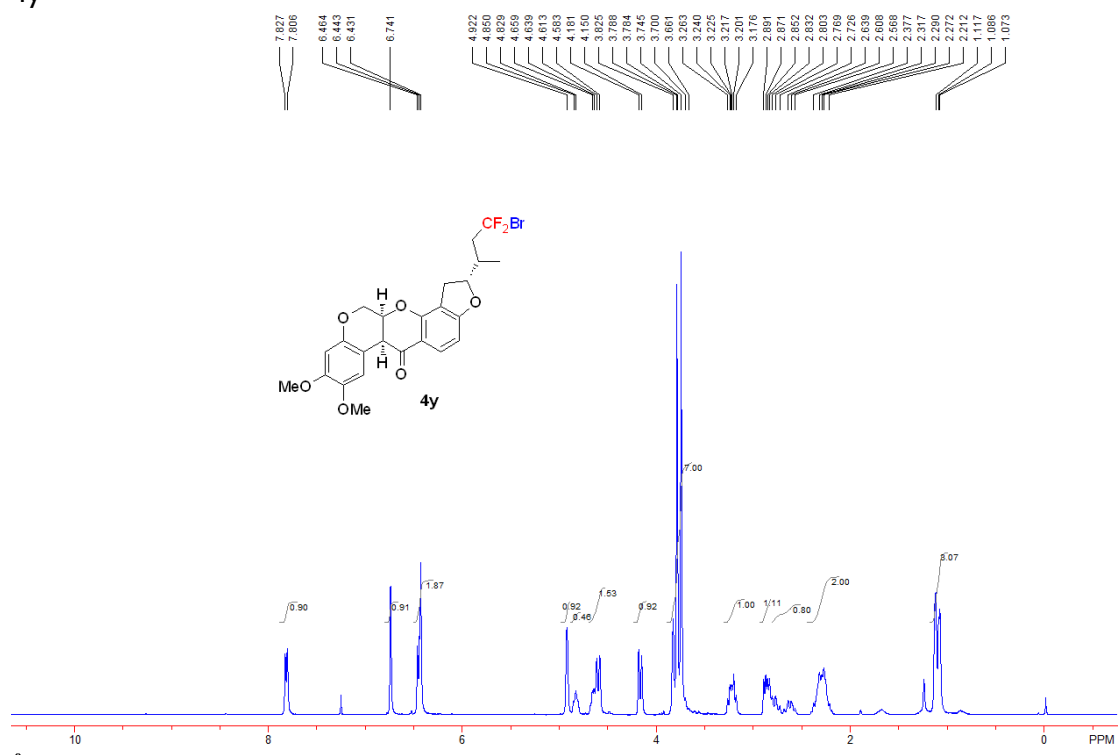

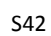

7a

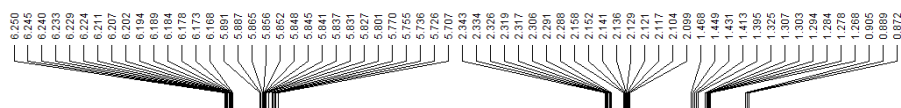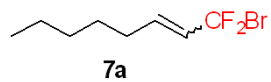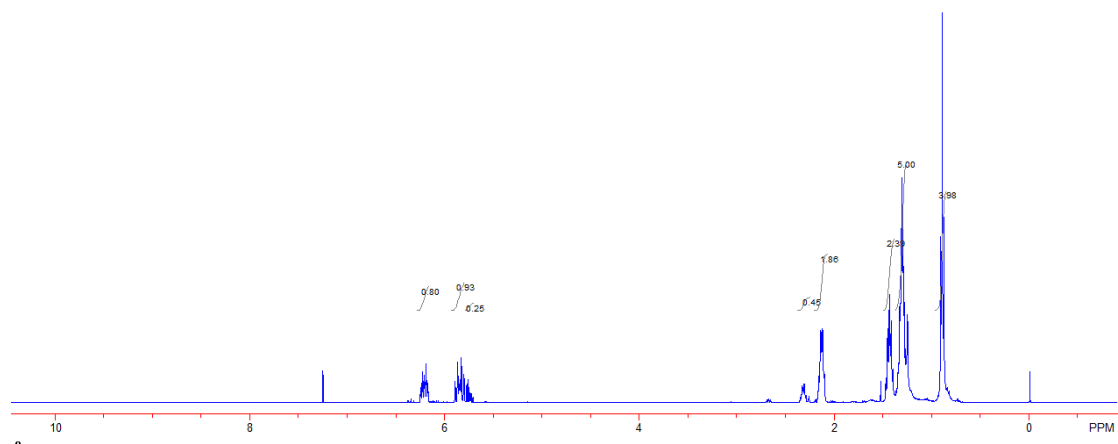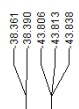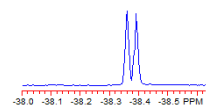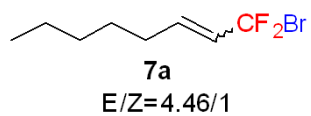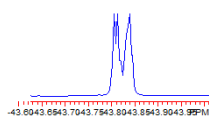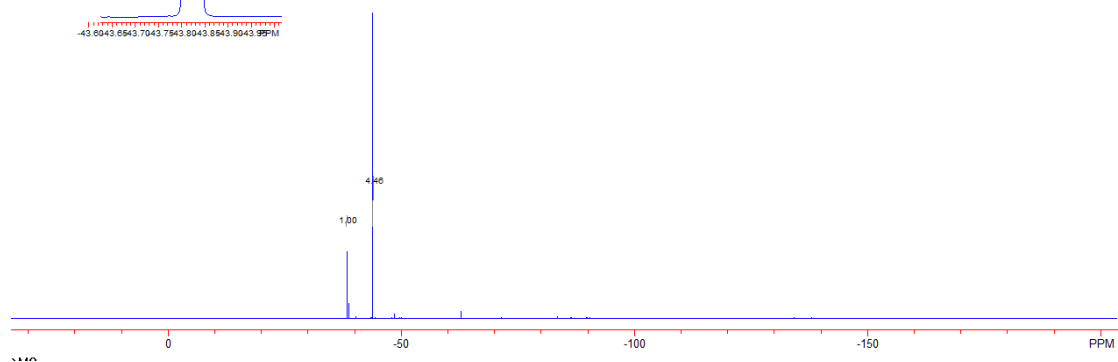

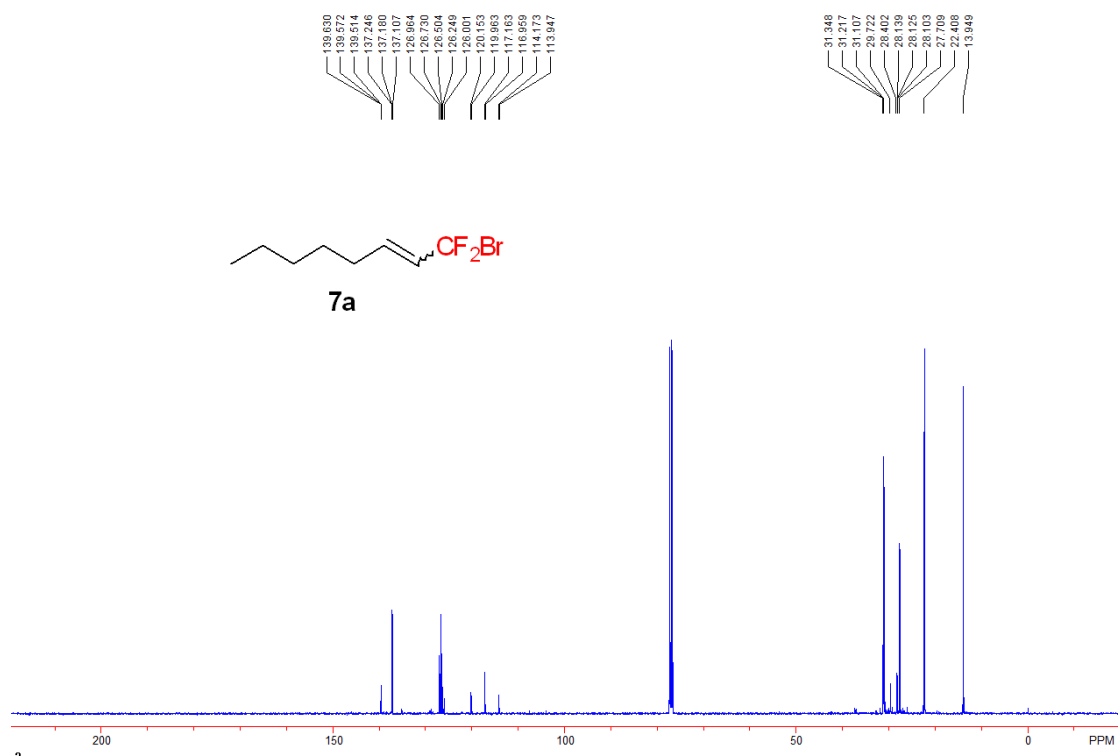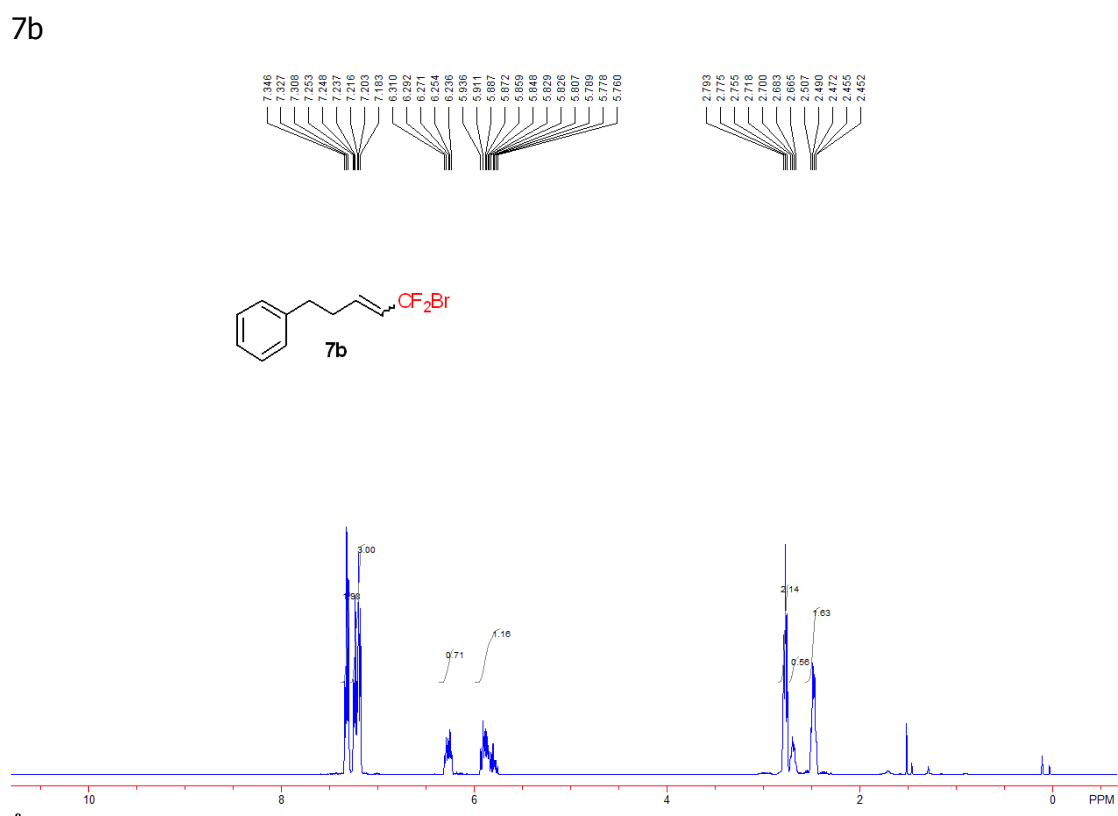

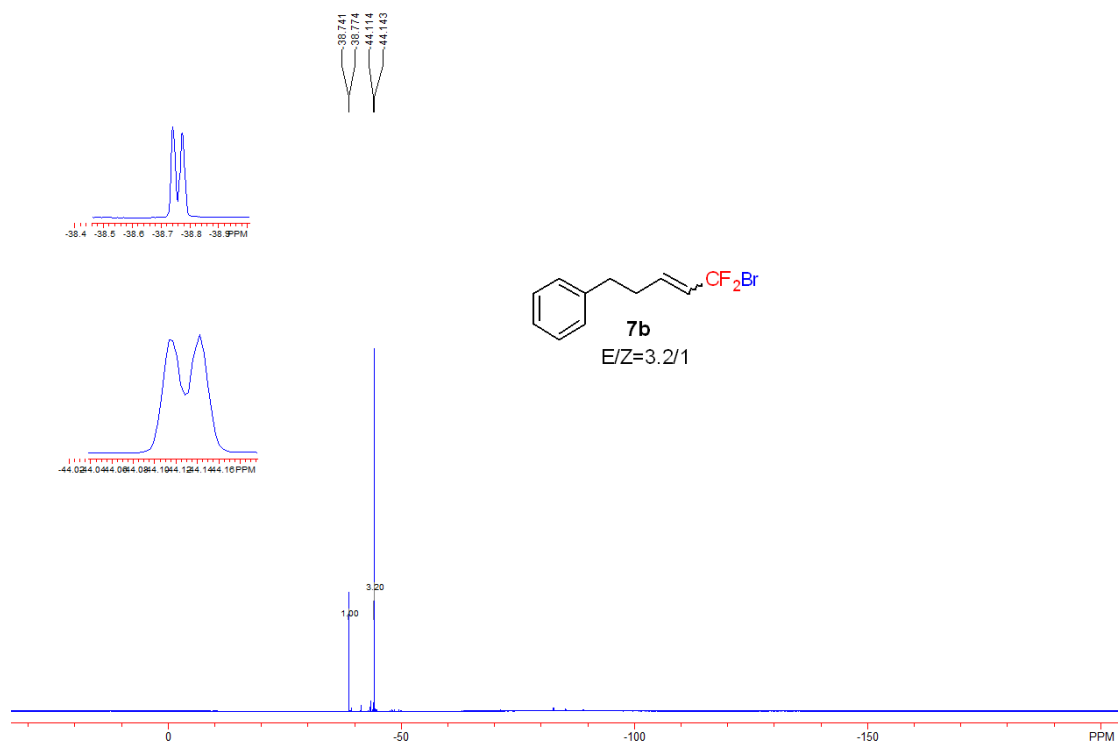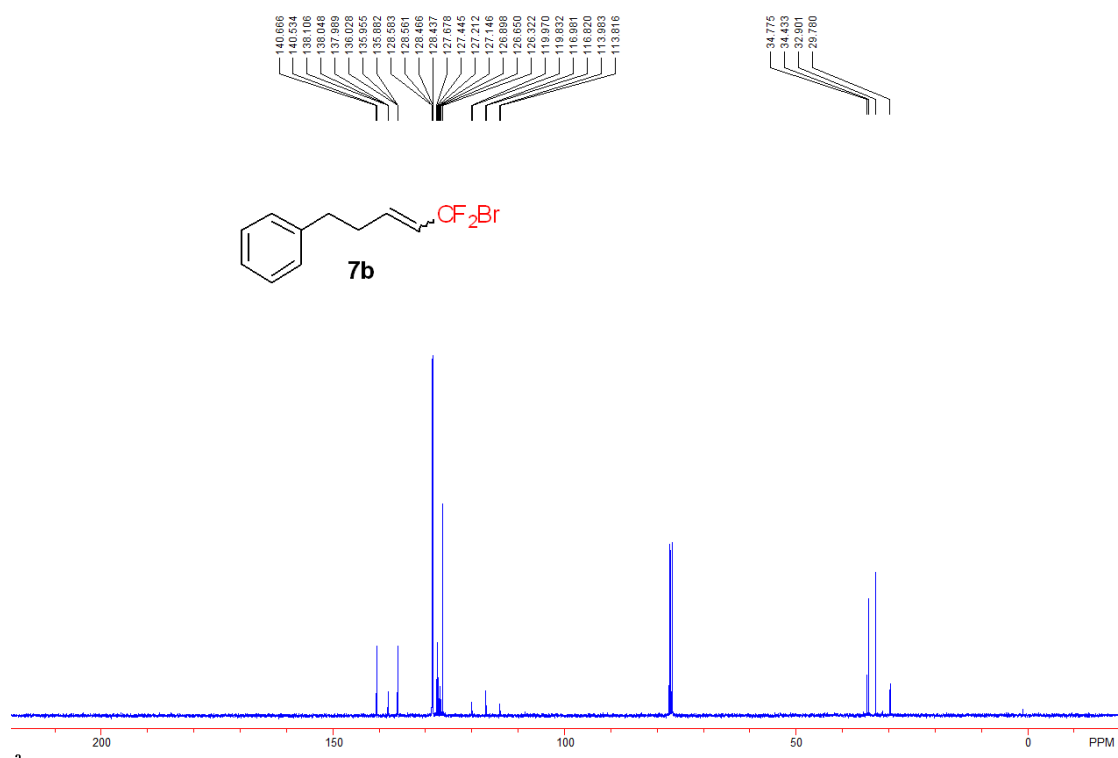

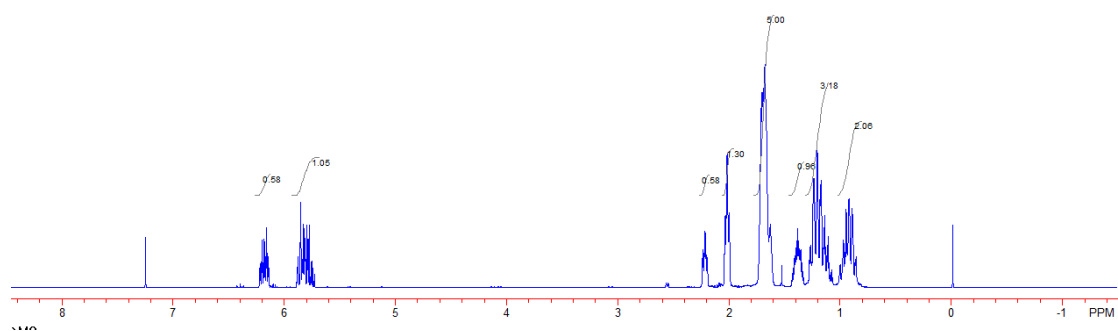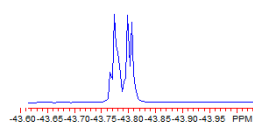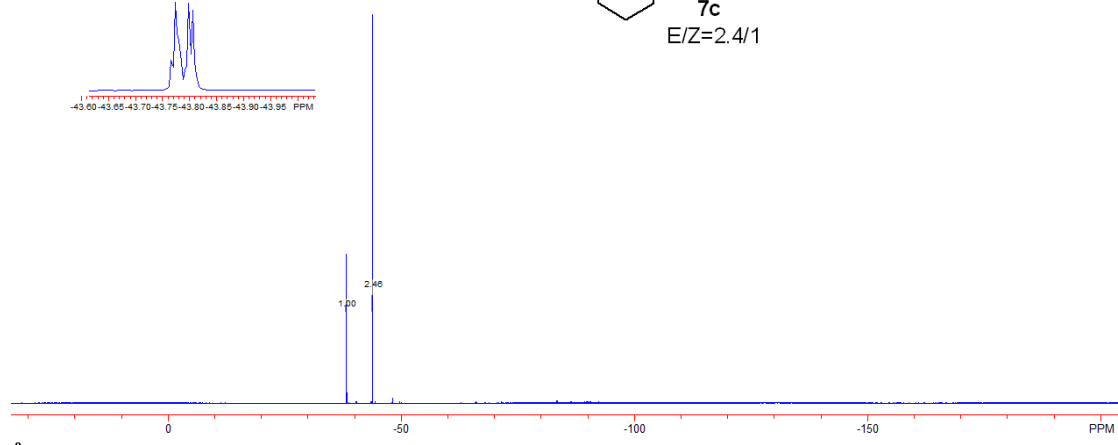

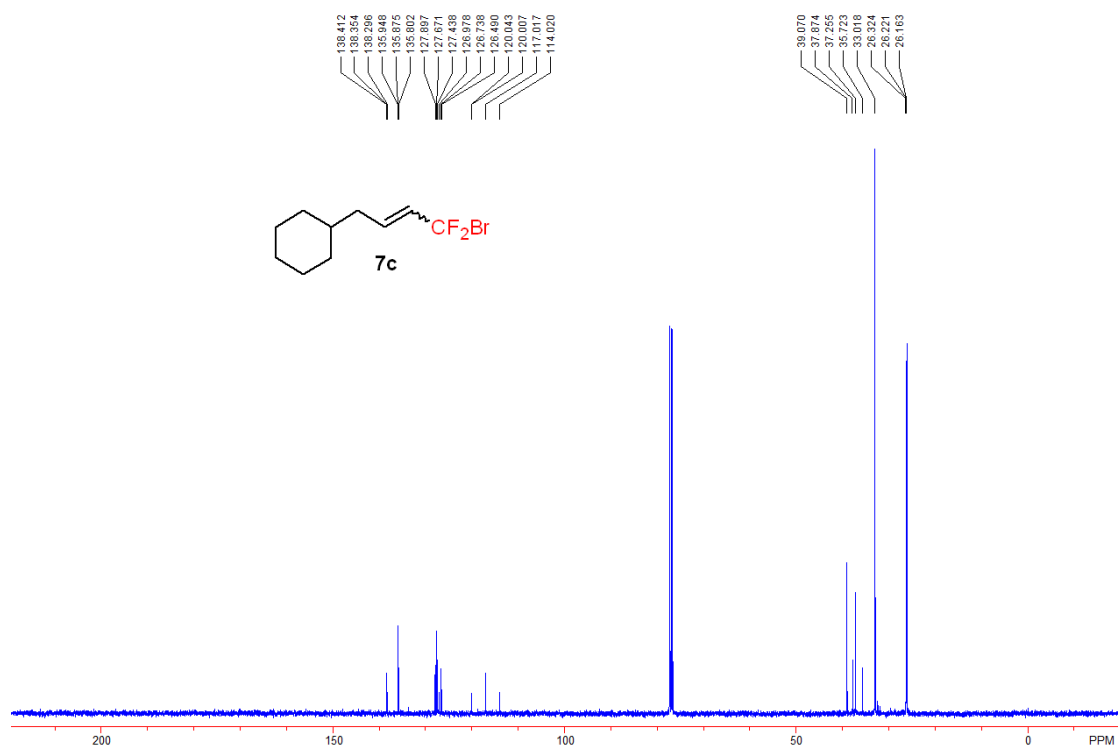

7d

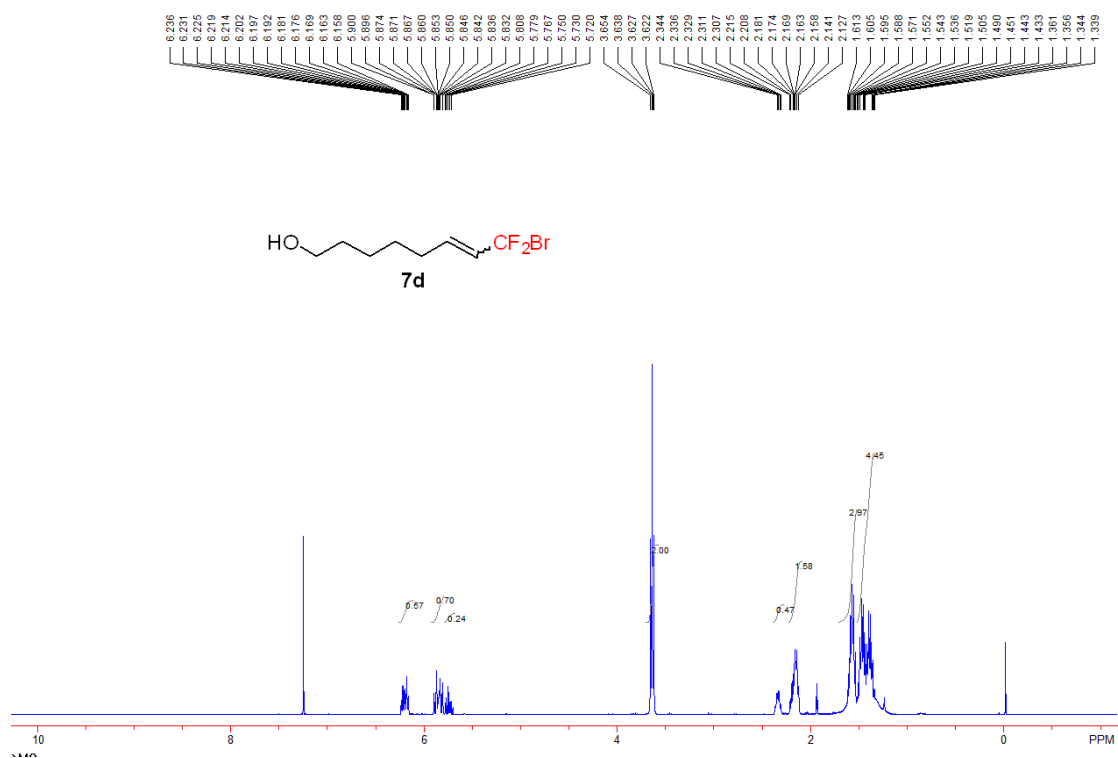

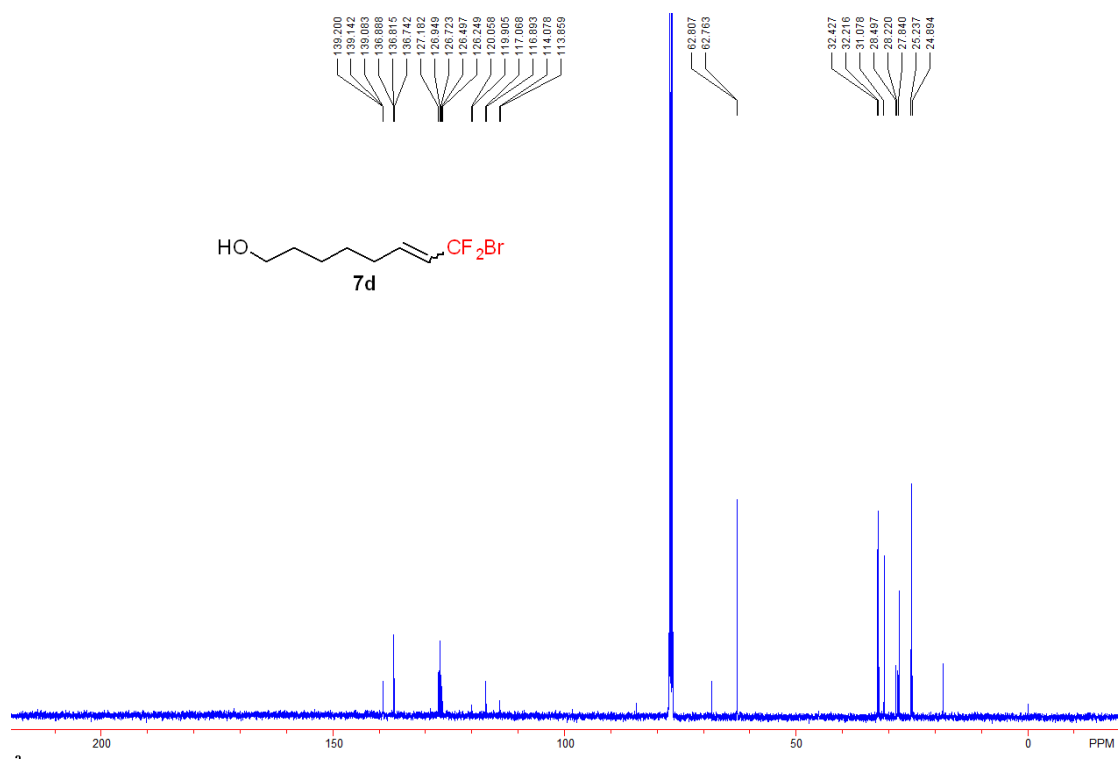



8

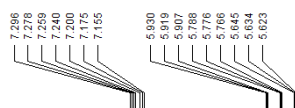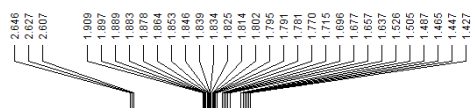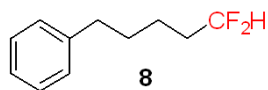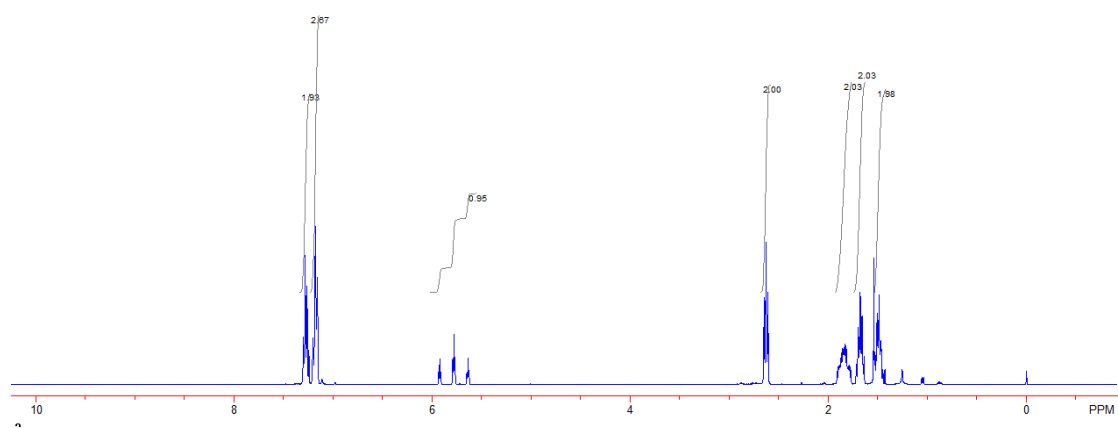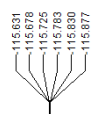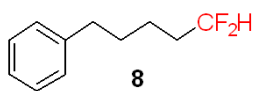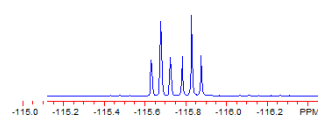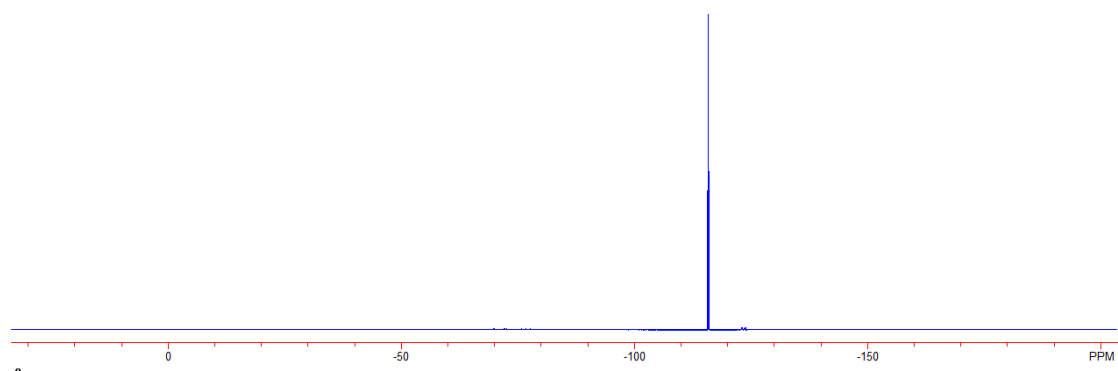

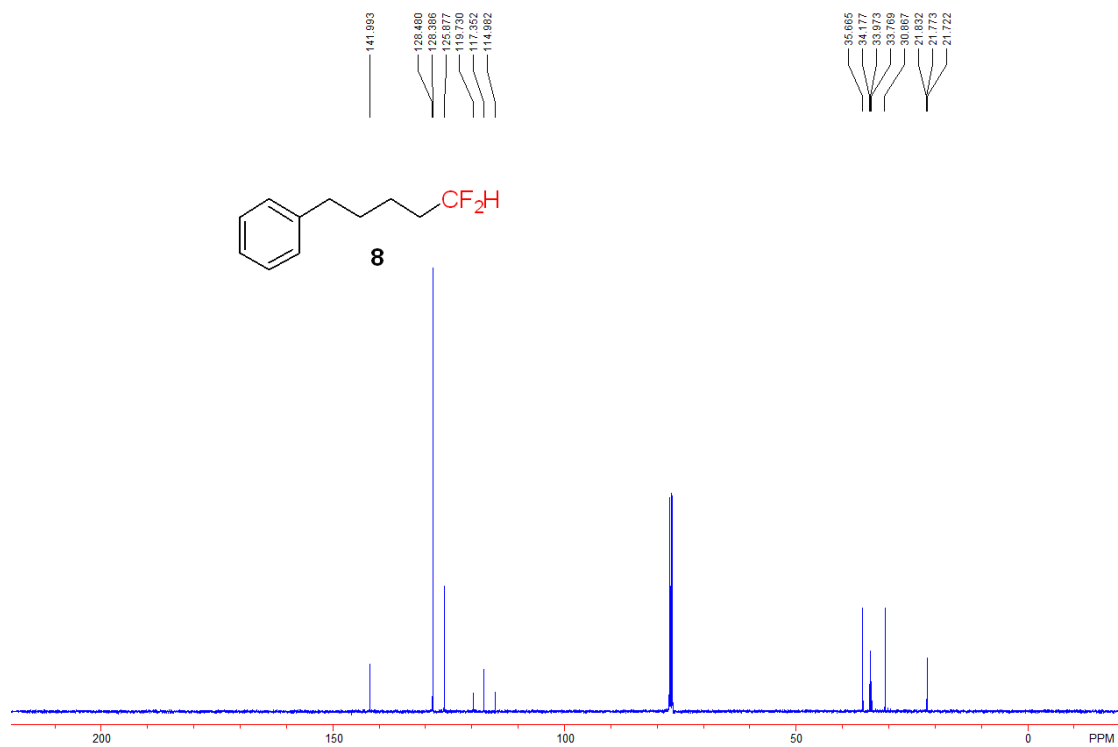

9

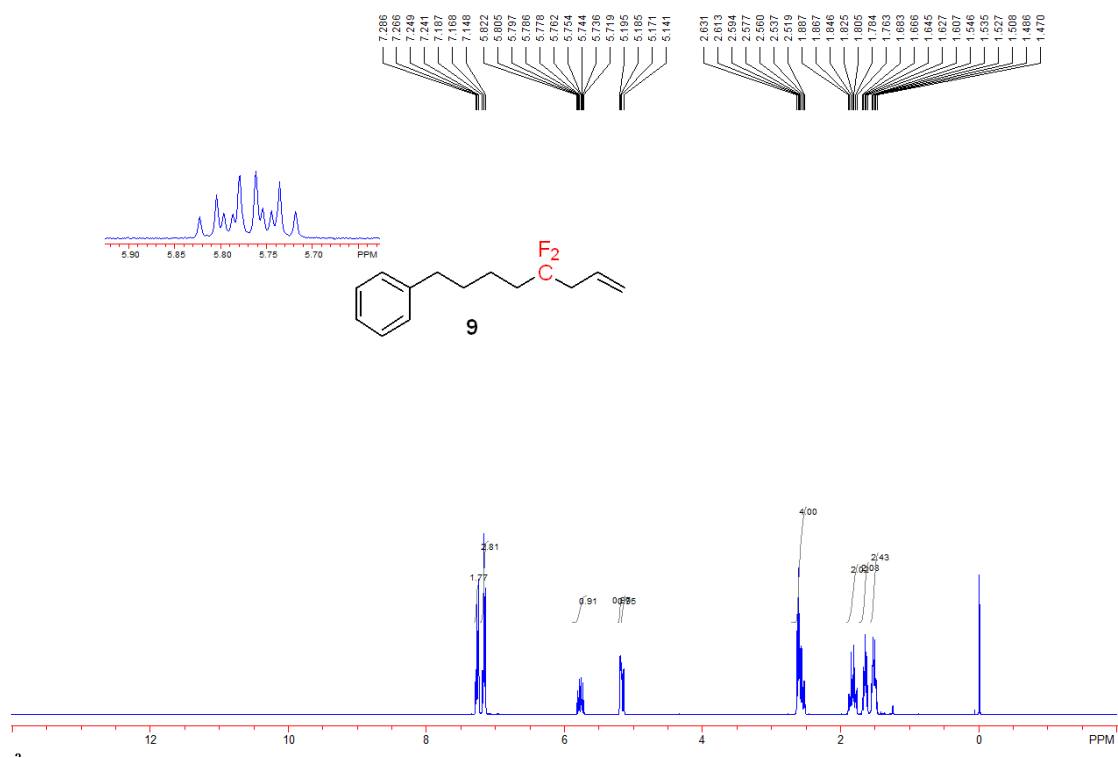

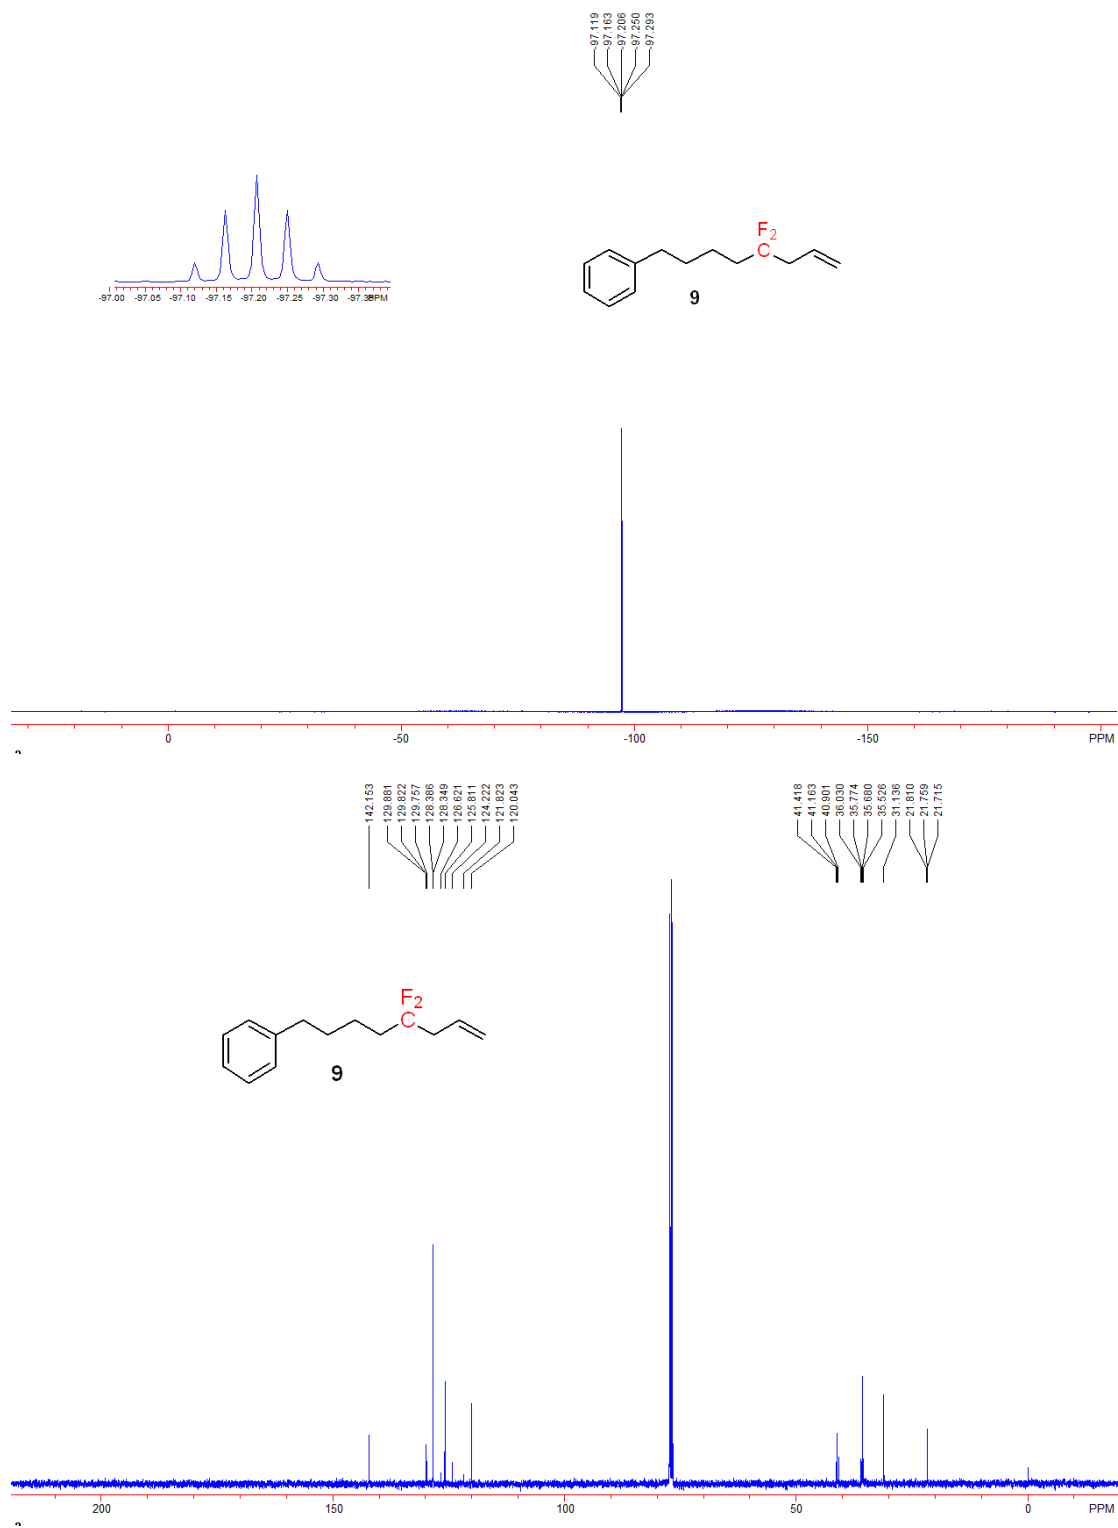

10

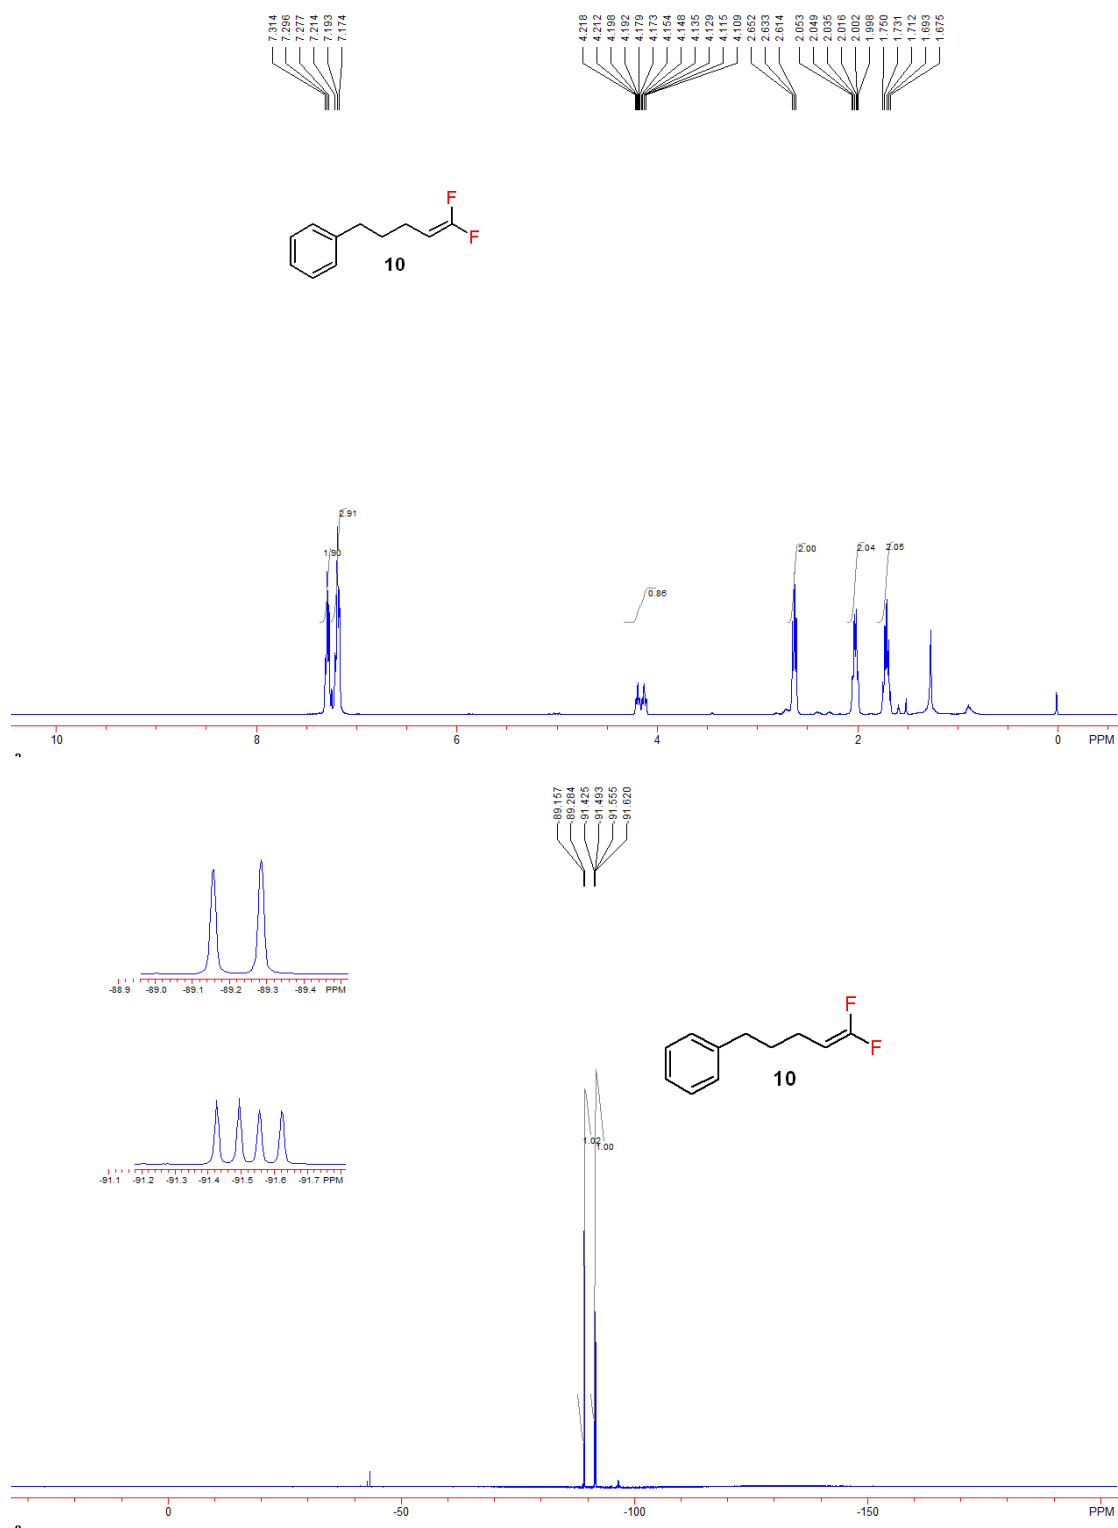

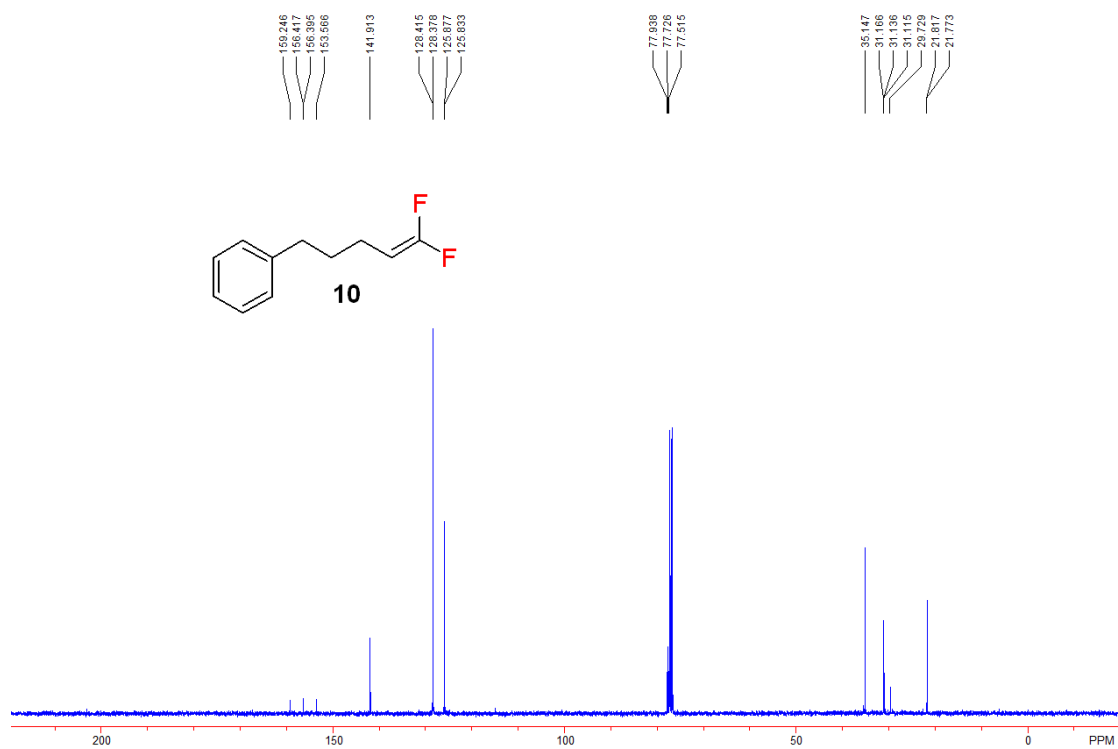

11

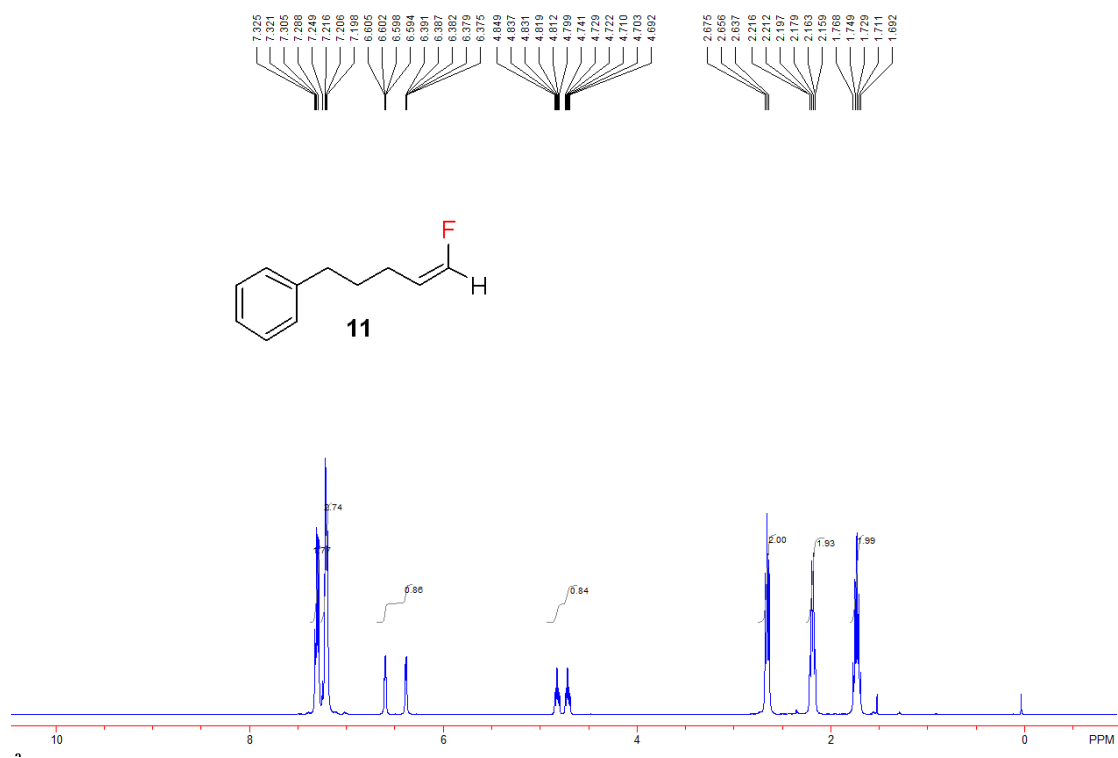

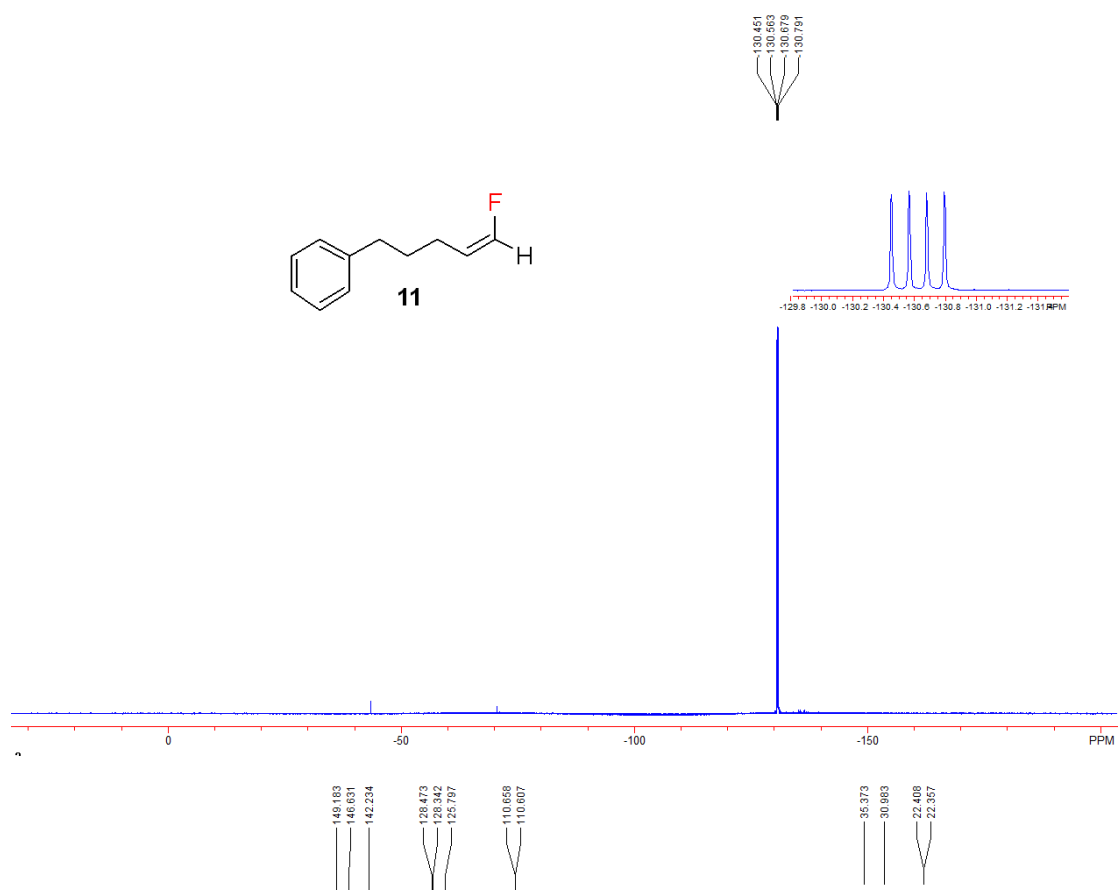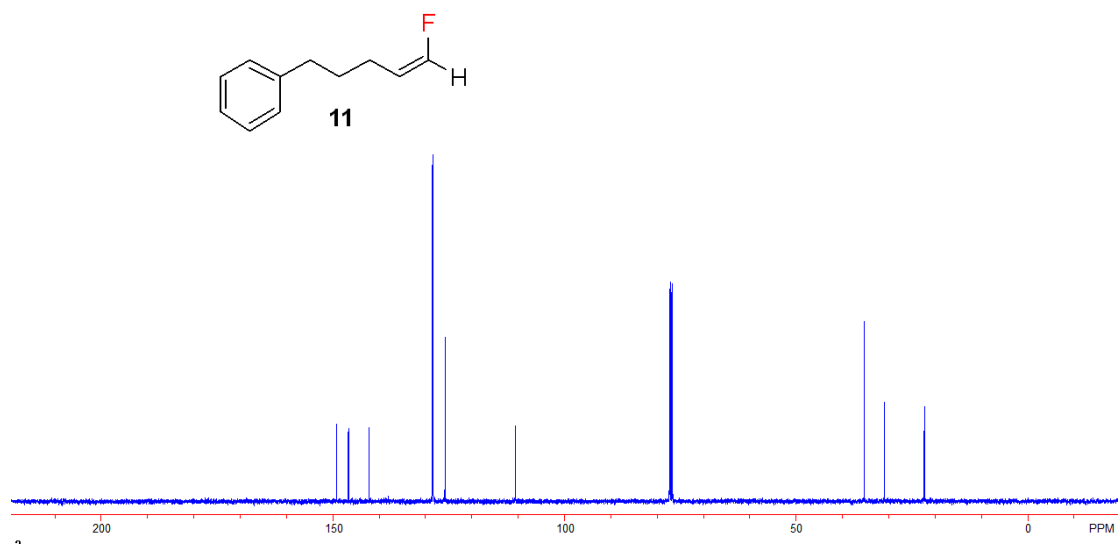

12

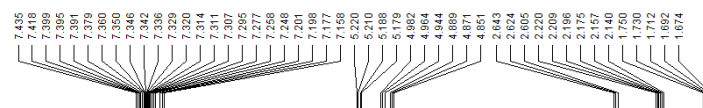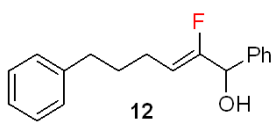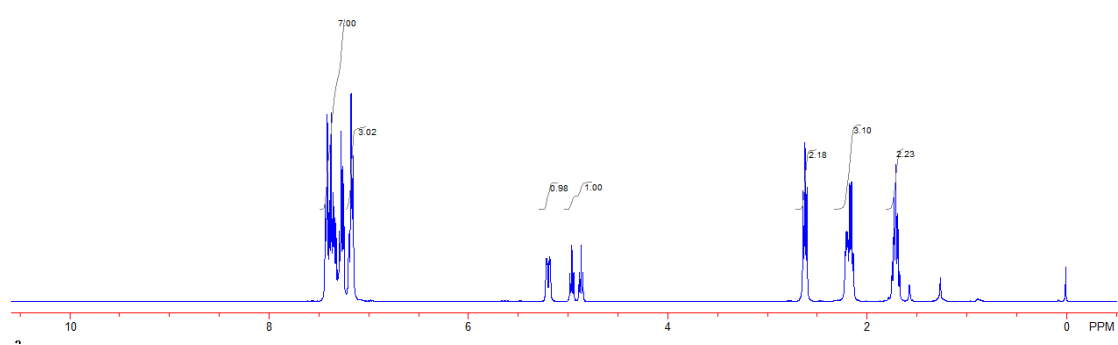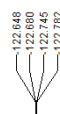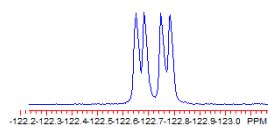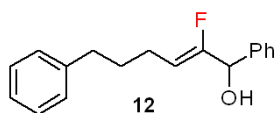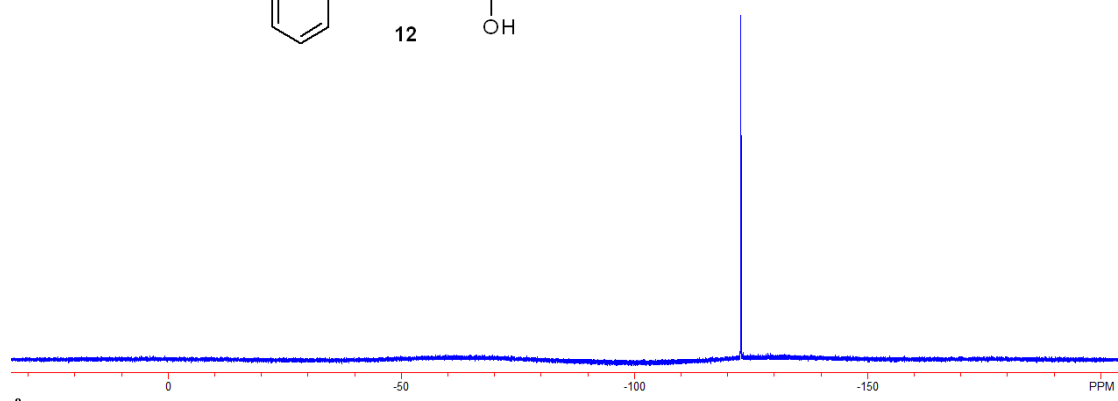

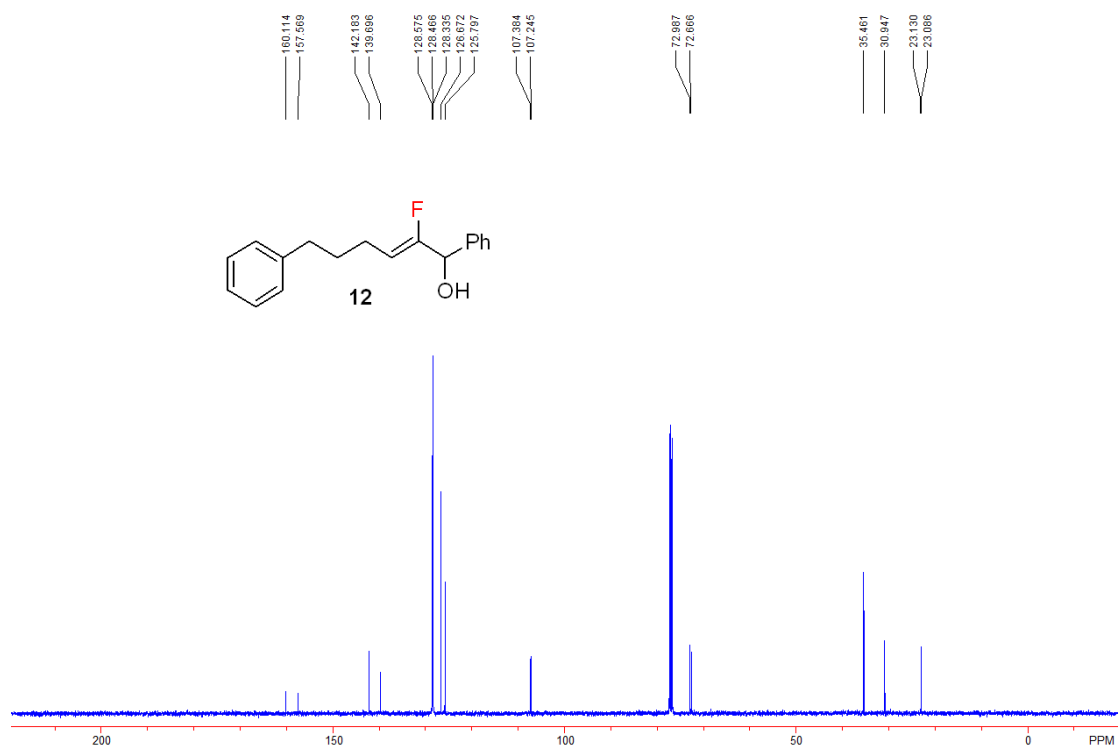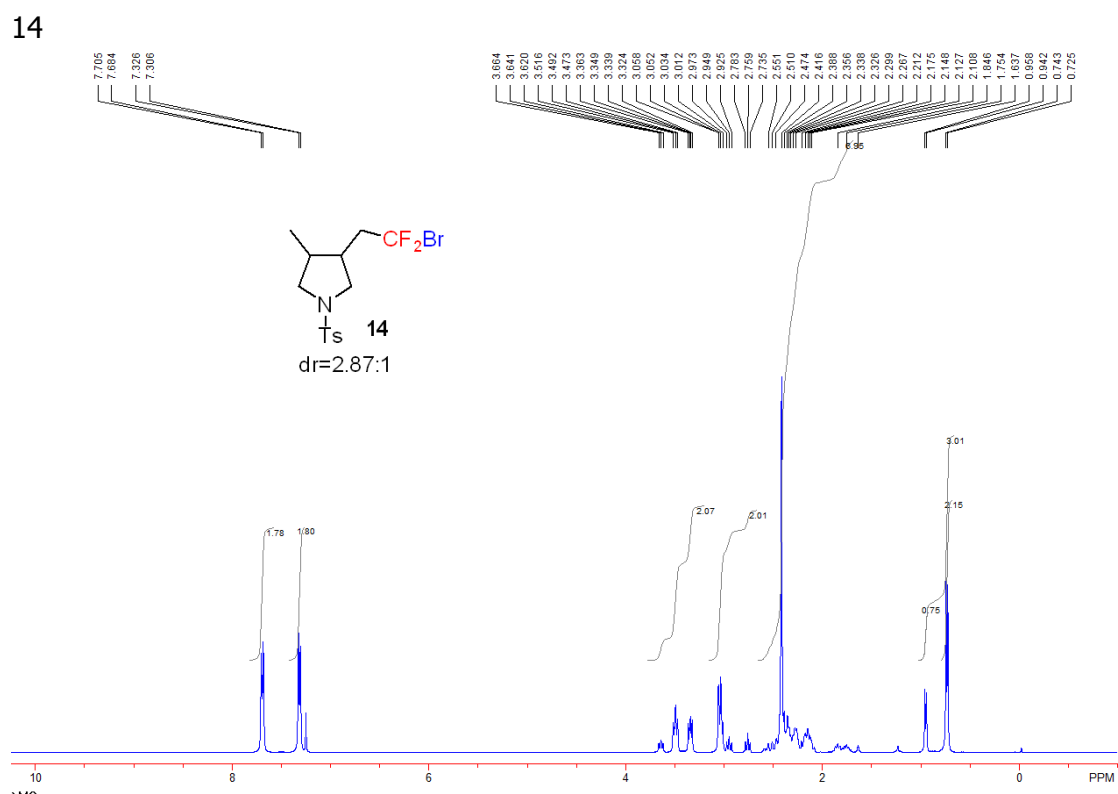



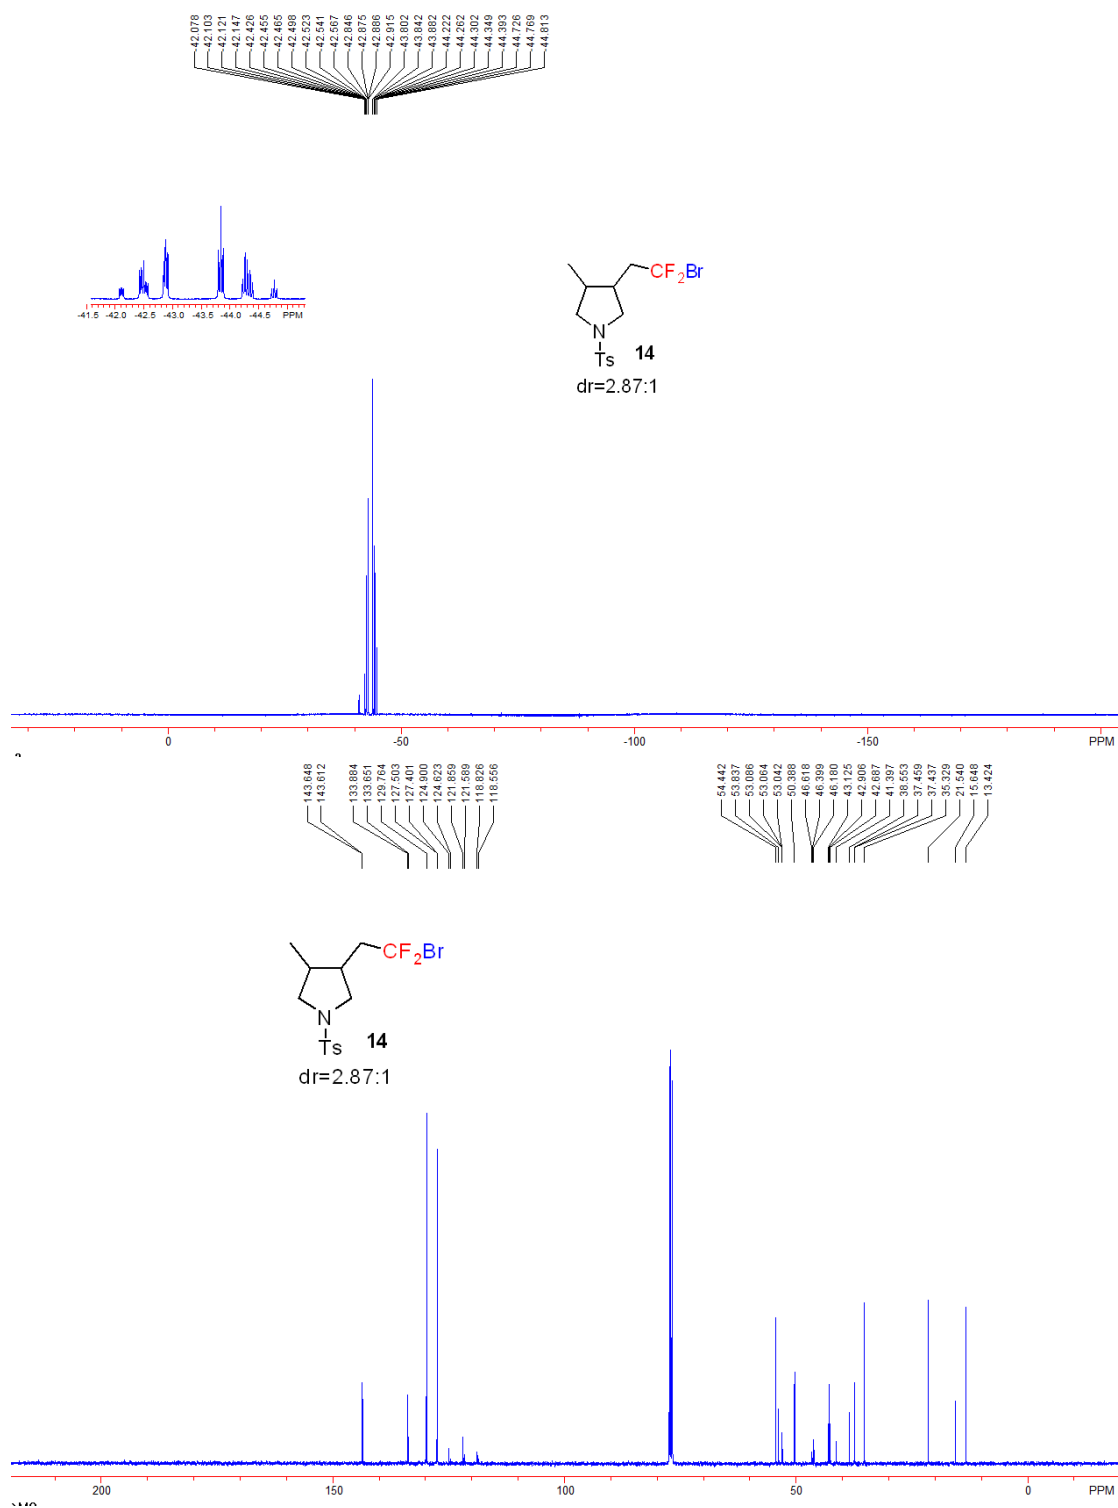

[D]4s

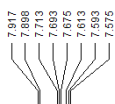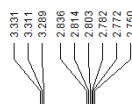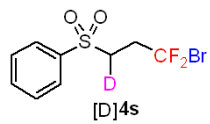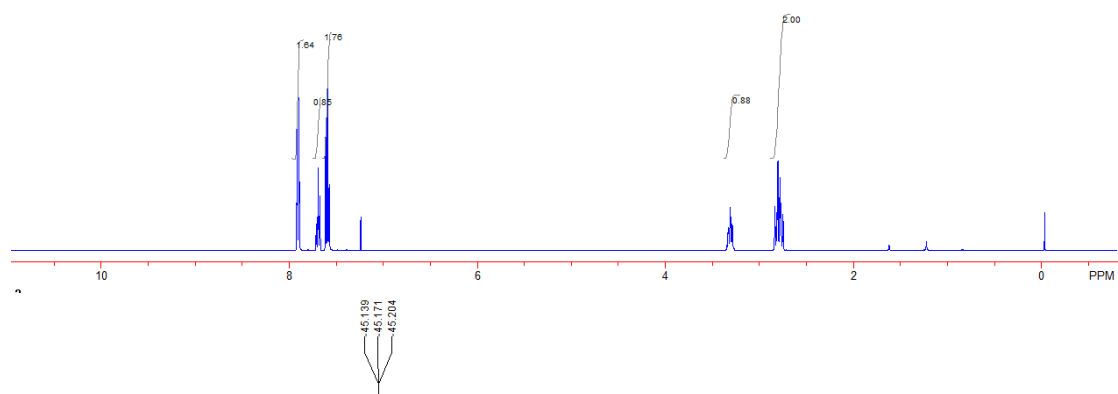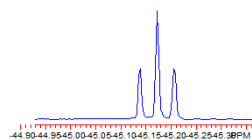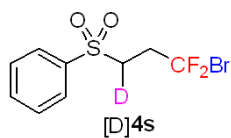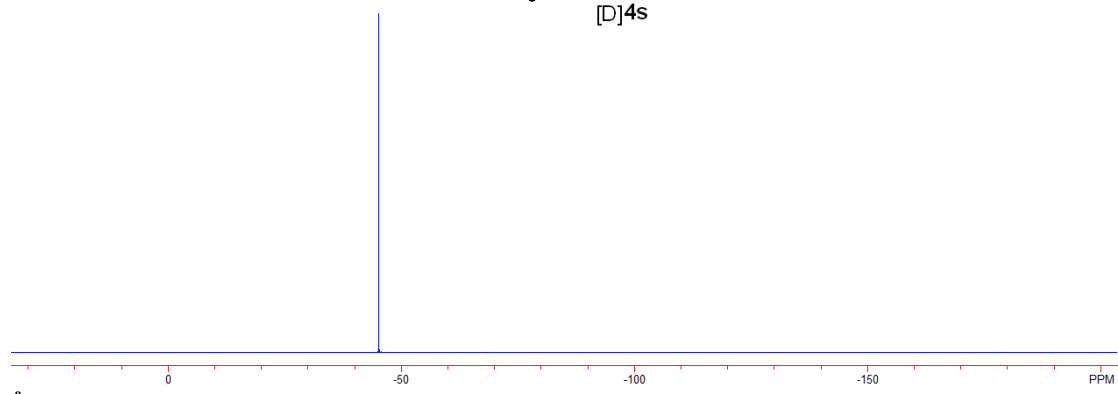

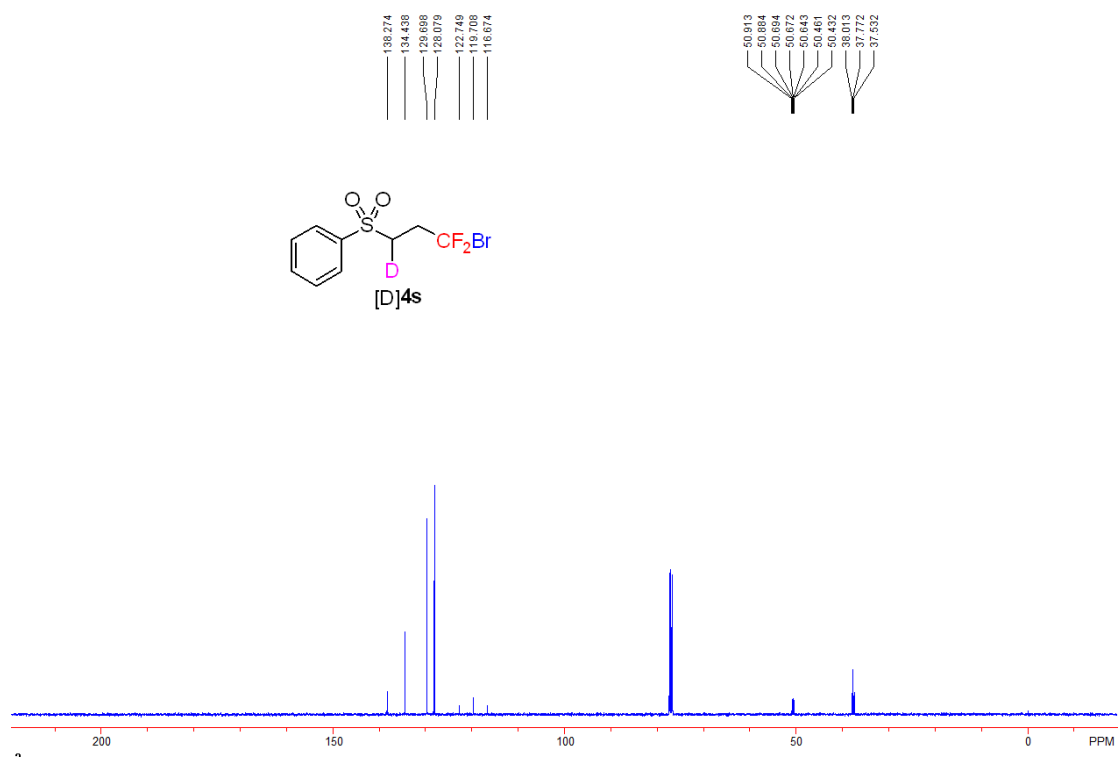

Supplement: c5ob01302j1.pdf [file c5ob01302j1.pdf]
